# Supplementary material for: Truce–Smiles rearrangement of substituted phenyl ethers
Source: Royal Society of Chemistry journal article supplement (doi:10.1039/c5ob00812c), 2015-01-01

## Truce-Smiles rearrangement of substituted phenyl ethers

Joel R. Kosowan, Zemane W'Giorgis, Ravneet Grewal, Tabitha E. Wood\*

*Department of Chemistry, The University of Winnipeg, 515 Portage Avenue, Winnipeg, Manitoba, Canada, R3B 2E9*

### Supporting Information

| <b>Item</b>                                                      | <b>Page</b> |
|------------------------------------------------------------------|-------------|
| <sup>1</sup> H NMR spectra of <b>1a</b> .....                    | S5          |
| <sup>13</sup> C{ <sup>1</sup> H} NMR spectra of <b>1a</b> .....  | S7          |
| <sup>1</sup> H NMR spectrum of <b>1b</b> .....                   | S9          |
| <sup>13</sup> C{ <sup>1</sup> H} NMR spectrum of <b>1b</b> ..... | S10         |
| <sup>1</sup> H NMR spectrum of <b>1c</b> .....                   | S11         |
| <sup>13</sup> C{ <sup>1</sup> H} NMR spectrum of <b>1c</b> ..... | S12         |
| <sup>1</sup> H NMR spectrum of <b>1d</b> .....                   | S13         |
| <sup>13</sup> C{ <sup>1</sup> H} NMR spectrum of <b>1d</b> ..... | S14         |
| <sup>1</sup> H NMR spectrum of <b>1e</b> .....                   | S15         |
| <sup>13</sup> C{ <sup>1</sup> H} NMR spectrum of <b>1e</b> ..... | S16         |
| <sup>1</sup> H NMR spectrum of <b>1f</b> .....                   | S17         |
| <sup>13</sup> C{ <sup>1</sup> H} NMR spectrum of <b>1f</b> ..... | S18         |
| <sup>1</sup> H NMR spectrum of <b>1g</b> .....                   | S19         |
| <sup>13</sup> C{ <sup>1</sup> H} NMR spectrum of <b>1g</b> ..... | S20         |
| <sup>1</sup> H NMR spectrum of <b>1h</b> .....                   | S21         |
| <sup>13</sup> C{ <sup>1</sup> H} NMR spectrum of <b>1h</b> ..... | S22         |
| <sup>1</sup> H NMR spectrum of <b>1i</b> .....                   | S23         |
| <sup>13</sup> C{ <sup>1</sup> H} NMR spectrum of <b>1i</b> ..... | S24         |

|                                                                                                   |     |
|---------------------------------------------------------------------------------------------------|-----|
| $^1\text{H}$ NMR spectrum of <b>1j</b> .....                                                      | S25 |
| $^{13}\text{C}\{^1\text{H}\}$ NMR spectrum of <b>1j</b> .....                                     | S26 |
| $^1\text{H}$ NMR spectrum of <b>1k</b> .....                                                      | S27 |
| $^{13}\text{C}\{^1\text{H}\}$ NMR spectrum of <b>1k</b> .....                                     | S28 |
| $^1\text{H}$ NMR spectrum of <b>1l</b> .....                                                      | S29 |
| $^{13}\text{C}\{^1\text{H}\}$ NMR spectrum of <b>1l</b> .....                                     | S30 |
| $^1\text{H}$ NMR spectrum of <b>1m</b> .....                                                      | S31 |
| $^{13}\text{C}\{^1\text{H}\}$ NMR spectrum of <b>1m</b> .....                                     | S32 |
| $^1\text{H}$ NMR spectrum of <b>1n</b> .....                                                      | S33 |
| $^{13}\text{C}\{^1\text{H}\}$ NMR spectrum of <b>1n</b> .....                                     | S34 |
| $^1\text{H}$ NMR spectrum of <b>1o</b> .....                                                      | S35 |
| $^{13}\text{C}\{^1\text{H}\}$ NMR spectrum of <b>1o</b> .....                                     | S36 |
| $^1\text{H}$ NMR spectrum of <b>1p</b> .....                                                      | S37 |
| $^{13}\text{C}\{^1\text{H}\}$ and $^{13}\text{C}\{^{19}\text{F}\}$ NMR spectra of <b>1p</b> ..... | S38 |
| $^1\text{H}$ NMR spectrum of <b>1q</b> .....                                                      | S39 |
| $^{13}\text{C}\{^1\text{H}\}$ NMR spectrum of <b>1q</b> .....                                     | S40 |
| $^1\text{H}$ NMR spectrum of <b>1r</b> .....                                                      | S41 |
| $^{13}\text{C}\{^1\text{H}\}$ NMR spectrum of <b>1r</b> .....                                     | S42 |
| $^1\text{H}$ NMR spectrum of <b>1s</b> .....                                                      | S43 |
| $^{13}\text{C}\{^1\text{H}\}$ NMR spectrum of <b>1s</b> .....                                     | S44 |
| $^1\text{H}$ NMR spectrum of <b>1t</b> .....                                                      | S45 |
| $^{13}\text{C}\{^1\text{H}\}$ NMR spectrum of <b>1t</b> .....                                     | S46 |
| $^1\text{H}$ NMR spectrum of <b>1u</b> .....                                                      | S47 |
| $^{13}\text{C}\{^1\text{H}\}$ NMR spectrum of <b>1u</b> .....                                     | S48 |
| $^1\text{H}$ NMR spectrum of <b>1v</b> .....                                                      | S49 |

|                                                               |     |
|---------------------------------------------------------------|-----|
| $^{13}\text{C}\{^1\text{H}\}$ NMR spectrum of <b>1v</b> ..... | S50 |
| $^1\text{H}$ NMR spectrum of <b>1w</b> .....                  | S51 |
| $^{13}\text{C}\{^1\text{H}\}$ NMR spectrum of <b>1w</b> ..... | S52 |
| $^1\text{H}$ NMR spectrum of <b>1x</b> .....                  | S53 |
| $^{13}\text{C}\{^1\text{H}\}$ NMR spectrum of <b>1x</b> ..... | S54 |
| $^1\text{H}$ NMR spectrum of <b>1y</b> .....                  | S55 |
| $^{13}\text{C}\{^1\text{H}\}$ NMR spectrum of <b>1y</b> ..... | S56 |
| $^1\text{H}$ NMR spectrum of <b>1z</b> .....                  | S57 |
| $^{13}\text{C}\{^1\text{H}\}$ NMR spectrum of <b>1z</b> ..... | S58 |
| $^1\text{H}$ NMR spectra of <b>2a</b> .....                   | S59 |
| $^{13}\text{C}\{^1\text{H}\}$ NMR spectra of <b>2a</b> .....  | S61 |
| $^1\text{H}$ NMR spectrum of <b>2c</b> .....                  | S63 |
| $^{13}\text{C}\{^1\text{H}\}$ NMR spectrum of <b>2c</b> ..... | S64 |
| $^1\text{H}$ NMR spectrum of <b>2d</b> .....                  | S65 |
| $^{13}\text{C}\{^1\text{H}\}$ NMR spectrum of <b>2d</b> ..... | S66 |
| $^1\text{H}$ NMR spectrum of <b>2e</b> .....                  | S67 |
| $^{13}\text{C}\{^1\text{H}\}$ NMR spectrum of <b>2e</b> ..... | S68 |
| $^1\text{H}$ NMR spectrum of <b>2f</b> .....                  | S69 |
| $^{13}\text{C}\{^1\text{H}\}$ NMR spectrum of <b>2f</b> ..... | S70 |
| $^1\text{H}$ NMR spectrum of <b>2g</b> .....                  | S71 |
| $^{13}\text{C}\{^1\text{H}\}$ NMR spectrum of <b>2g</b> ..... | S72 |
| $^1\text{H}$ NMR spectrum of <b>2j</b> .....                  | S73 |
| $^{13}\text{C}\{^1\text{H}\}$ NMR spectrum of <b>2j</b> ..... | S74 |
| $^1\text{H}$ NMR spectrum of <b>2r</b> .....                  | S75 |
| $^{13}\text{C}\{^1\text{H}\}$ NMR spectrum of <b>2r</b> ..... | S76 |

|                                                                               |     |
|-------------------------------------------------------------------------------|-----|
| $^1\text{H}$ NMR spectrum of <b>2s</b> .....                                  | S77 |
| $^{13}\text{C}\{^1\text{H}\}$ NMR spectrum of <b>2s</b> .....                 | S78 |
| $^1\text{H}$ NMR spectrum of <b>2t</b> .....                                  | S79 |
| $^{13}\text{C}\{^1\text{H}\}$ NMR spectrum of <b>2t</b> .....                 | S80 |
| $^1\text{H}$ NMR spectrum of <b>2w</b> .....                                  | S81 |
| $^{13}\text{C}\{^1\text{H}\}$ NMR spectrum of <b>2w</b> .....                 | S82 |
| $^1\text{H}$ NMR spectrum of <b>3</b> .....                                   | S83 |
| $^1\text{H}$ NMR spectrum of <b>4</b> .....                                   | S84 |
| $^{13}\text{C}\{^1\text{H}\}$ NMR spectrum of <b>4</b> .....                  | S85 |
| $^1\text{H}$ NMR spectrum of <b>5</b> .....                                   | S86 |
| $^{13}\text{C}\{^1\text{H}\}$ NMR spectrum of <b>5</b> .....                  | S87 |
| $^1\text{H}$ NMR spectrum of Meisenheimer intermediate .....                  | S88 |
| $^{13}\text{C}\{^1\text{H}\}$ NMR spectrum of Meisenheimer intermediate ..... | S89 |

$^1\text{H}$  NMR spectrum of **1a** in  $\text{CDCl}_3$  with 0.05% v/v TMS (400 MHz)

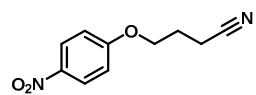

**1a**

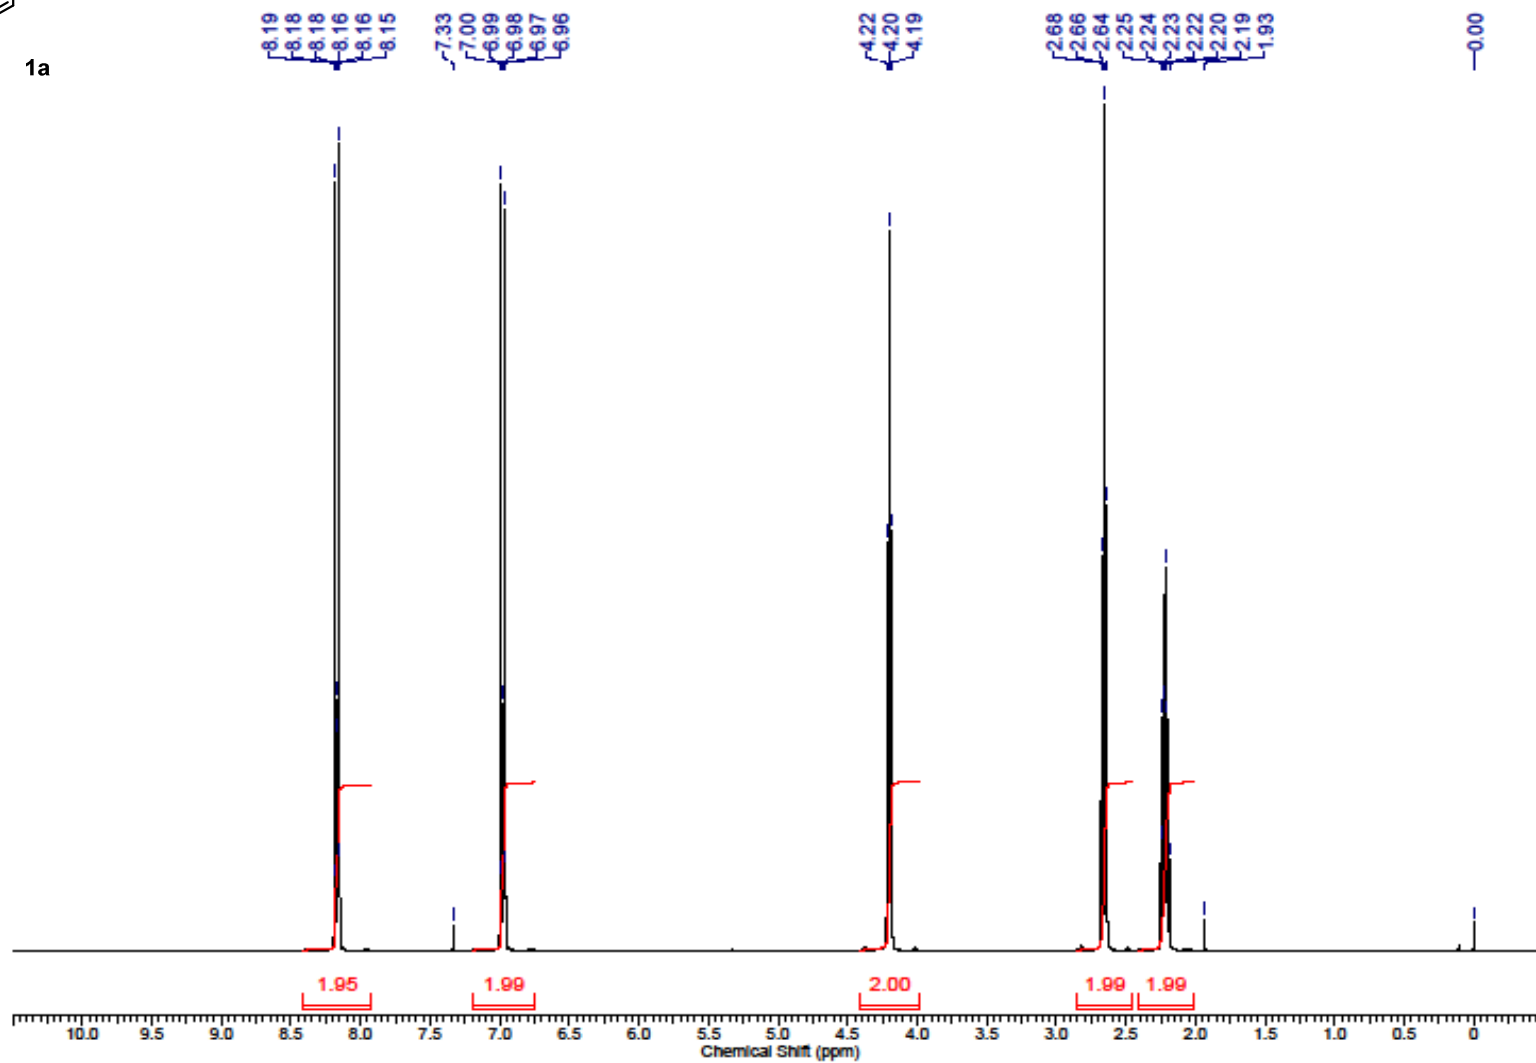

$^1\text{H}$  NMR spectrum of **1a** in  $(\text{CD}_3)_2\text{SO}$  with 0.05% v/v TMS (400 MHz)

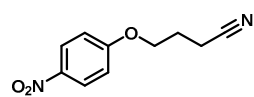

**1a**

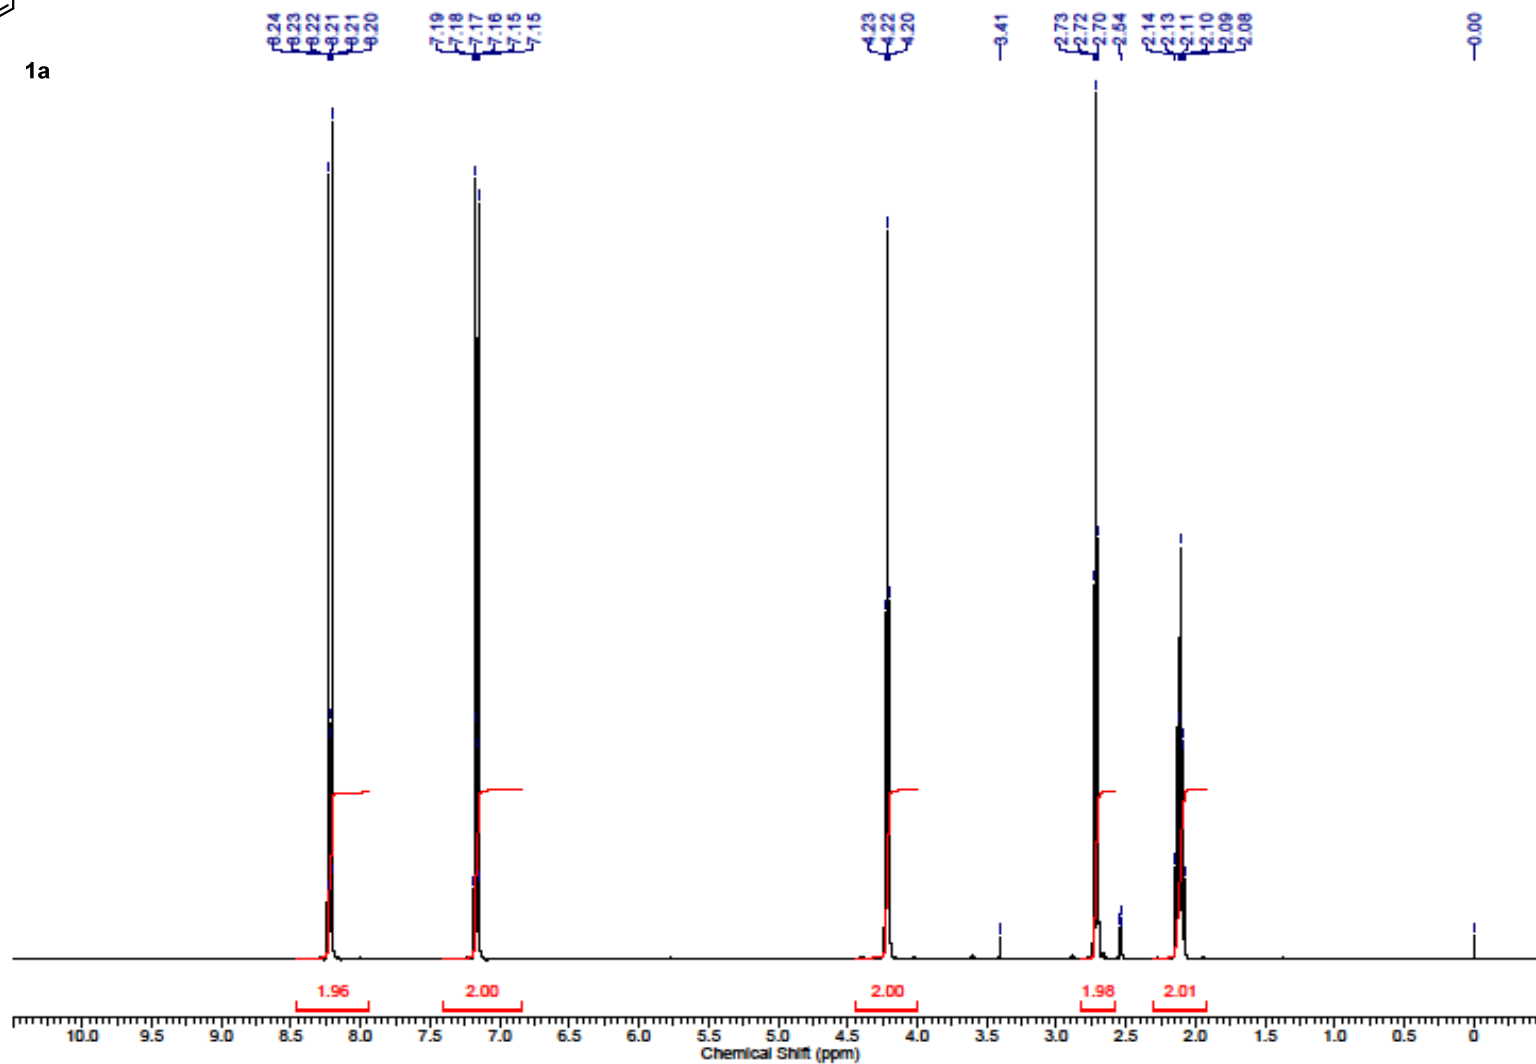

$^{13}\text{C}\{^1\text{H}\}$  NMR spectrum of **1a** in  $\text{CDCl}_3$  with 0.05% v/v TMS (100 MHz)

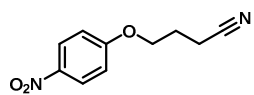

**1a**

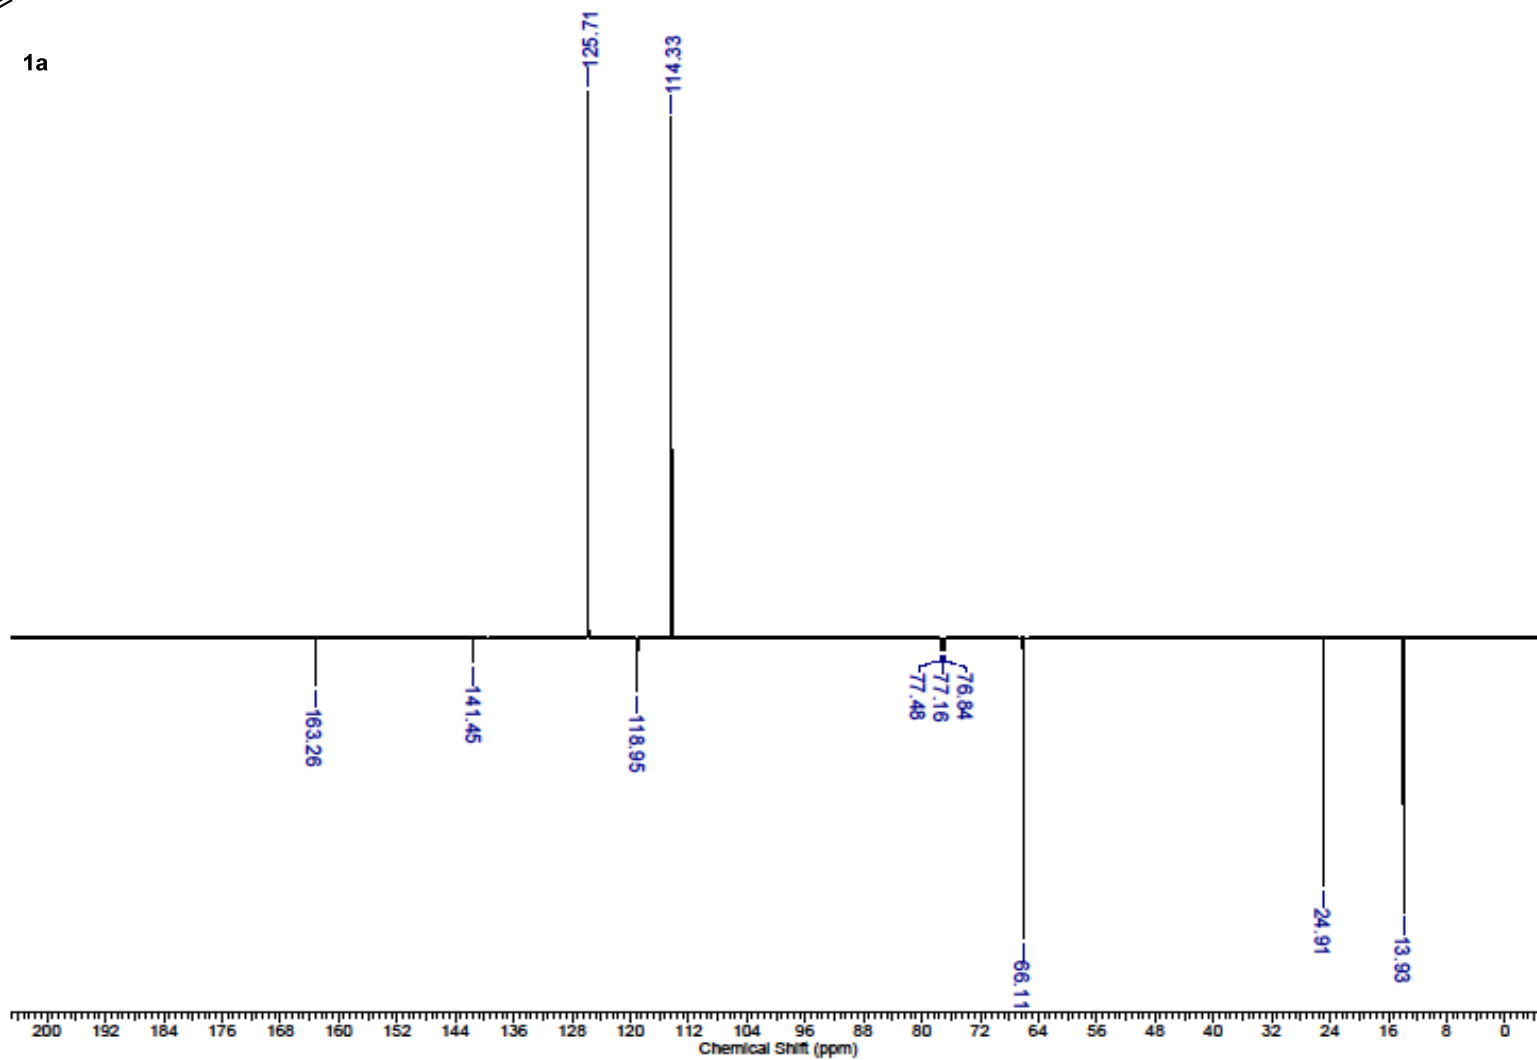

$^{13}\text{C}\{^1\text{H}\}$  NMR spectrum of **1a** in  $(\text{CD}_3)_2\text{SO}$  with 0.05% v/v TMS (100 MHz)

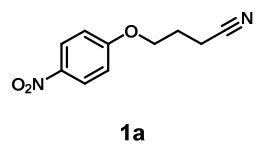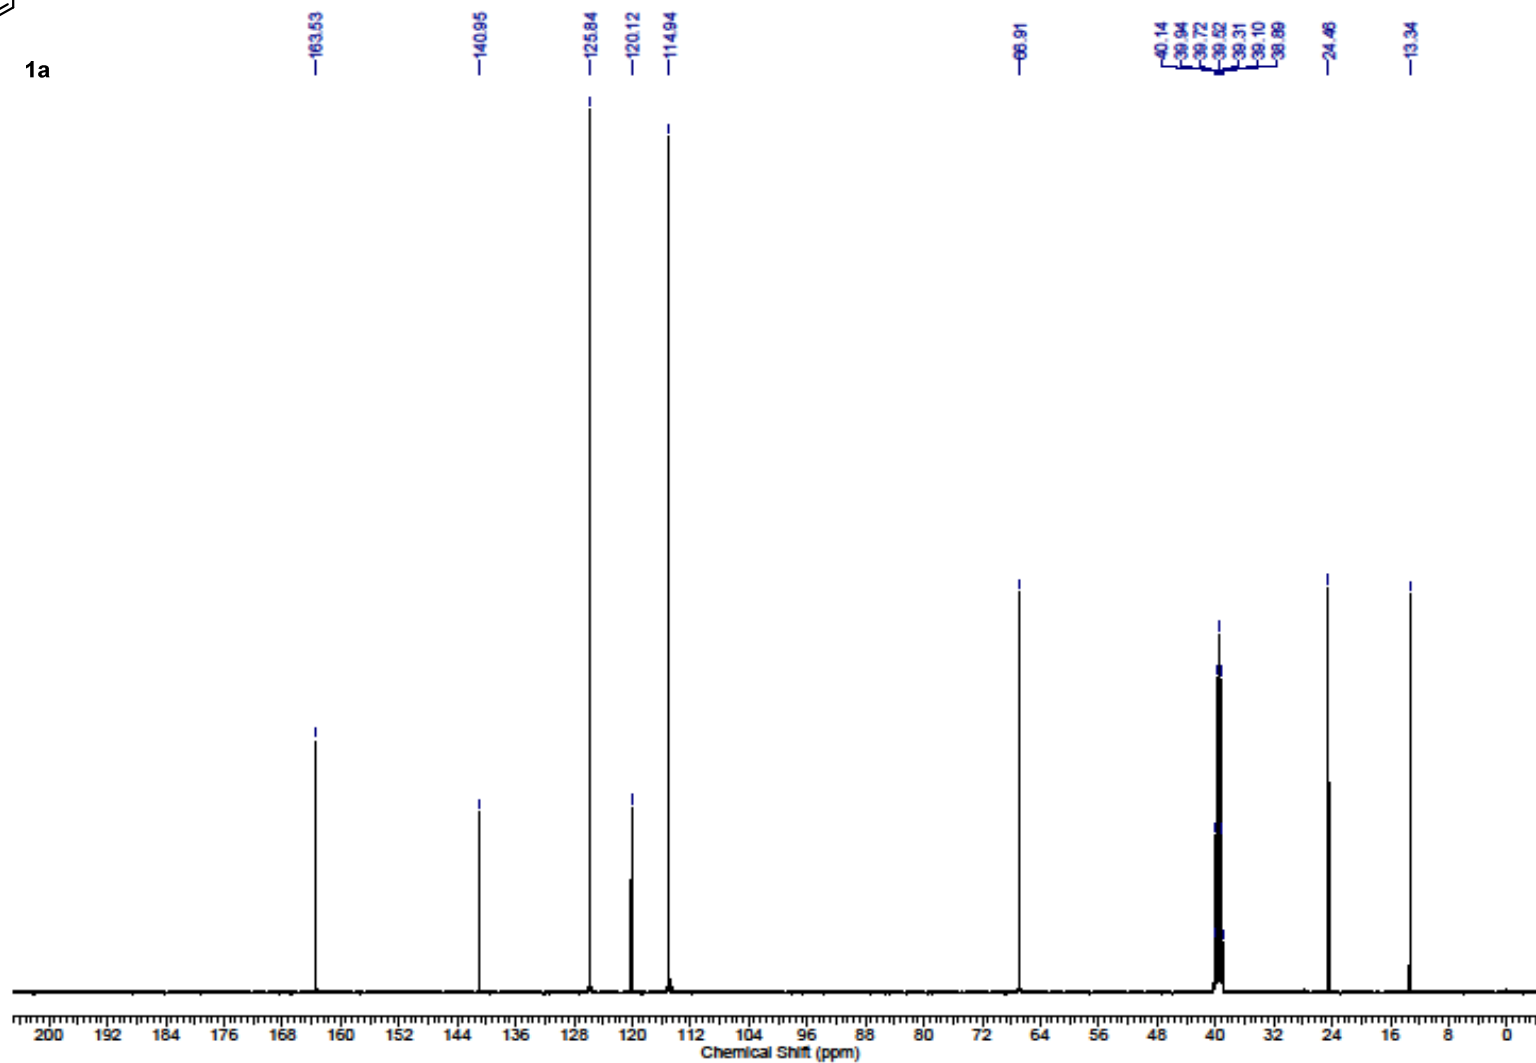



$^1\text{H}$  NMR spectrum of **1b** in  $\text{CDCl}_3$  with 0.05% v/v TMS (400 MHz)

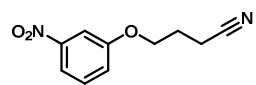

**1b**

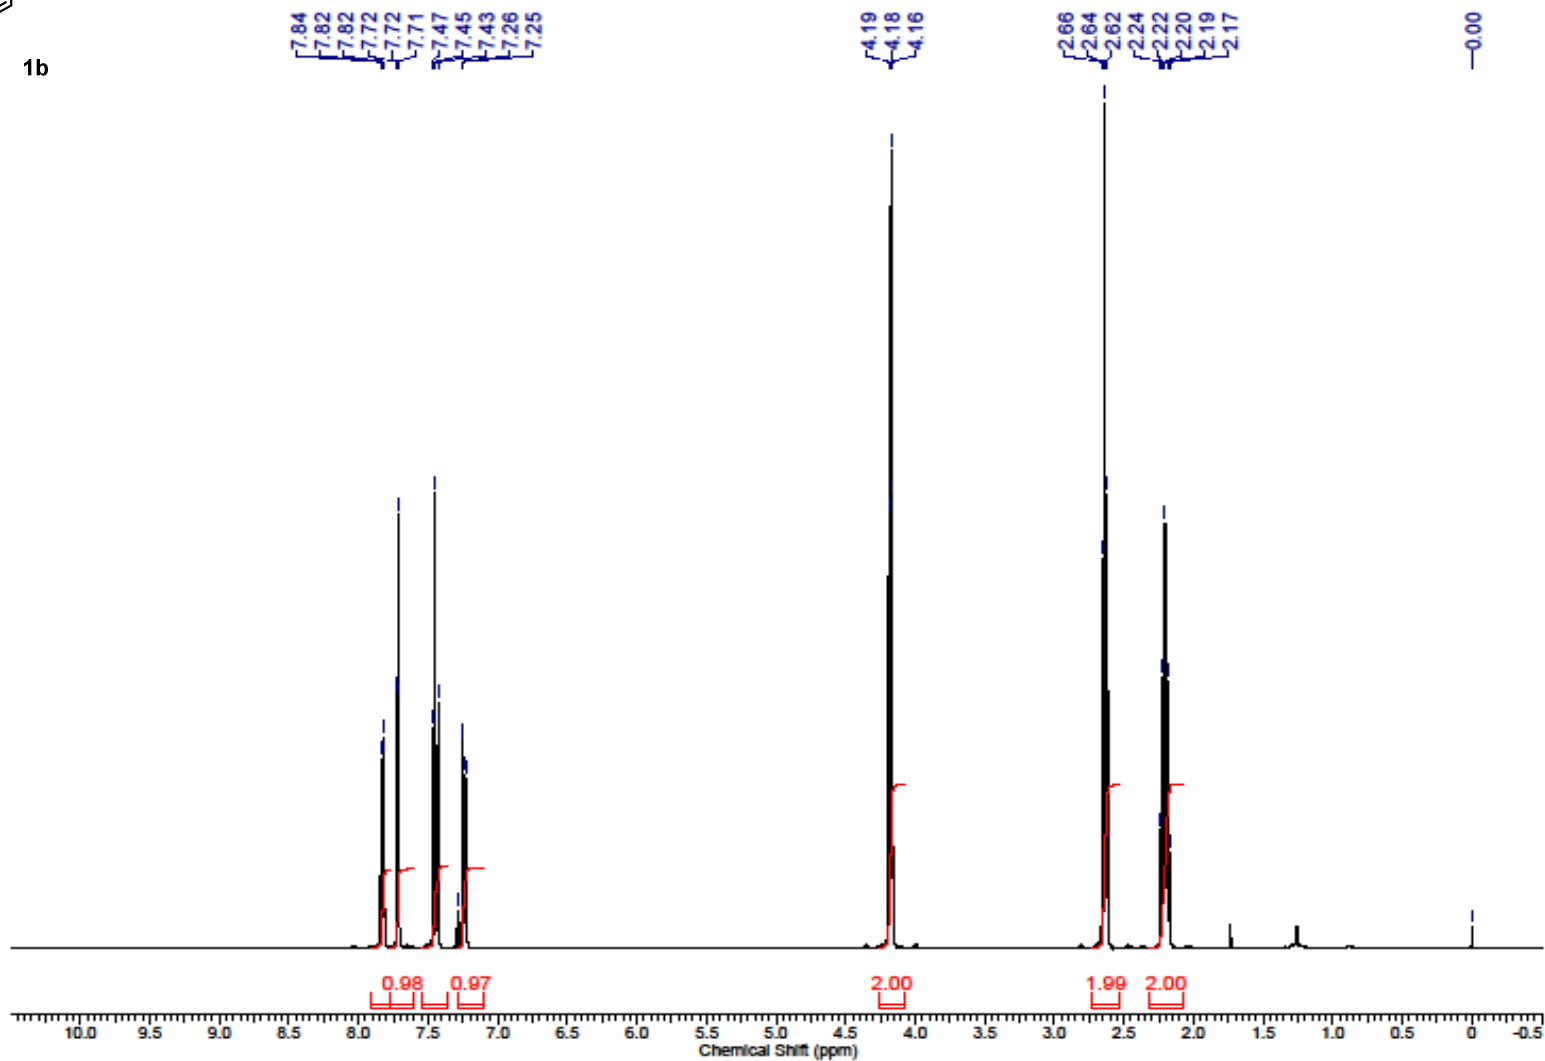

$^{13}\text{C}\{^1\text{H}\}$  NMR spectrum of **1b** in  $\text{CDCl}_3$  with 0.05% v/v TMS (100 MHz)



**1b**

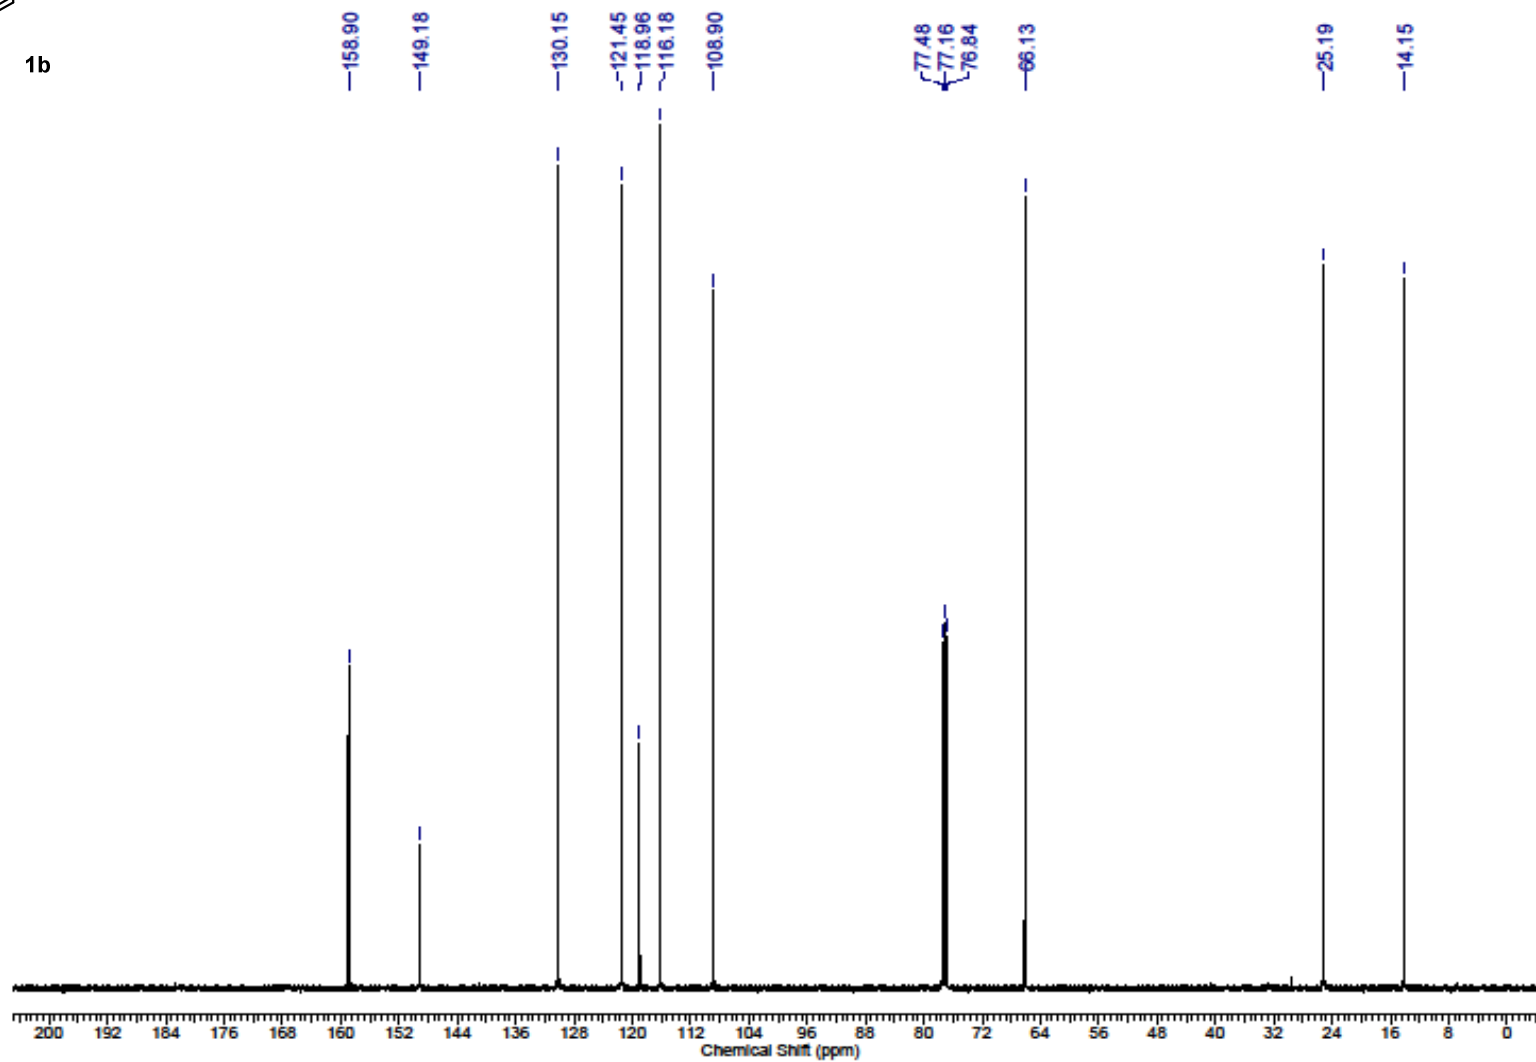

$^1\text{H}$  NMR spectrum of **1c** in  $\text{CDCl}_3$  with 0.05% v/v TMS (400 MHz)

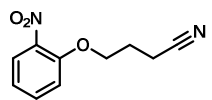

**1c**

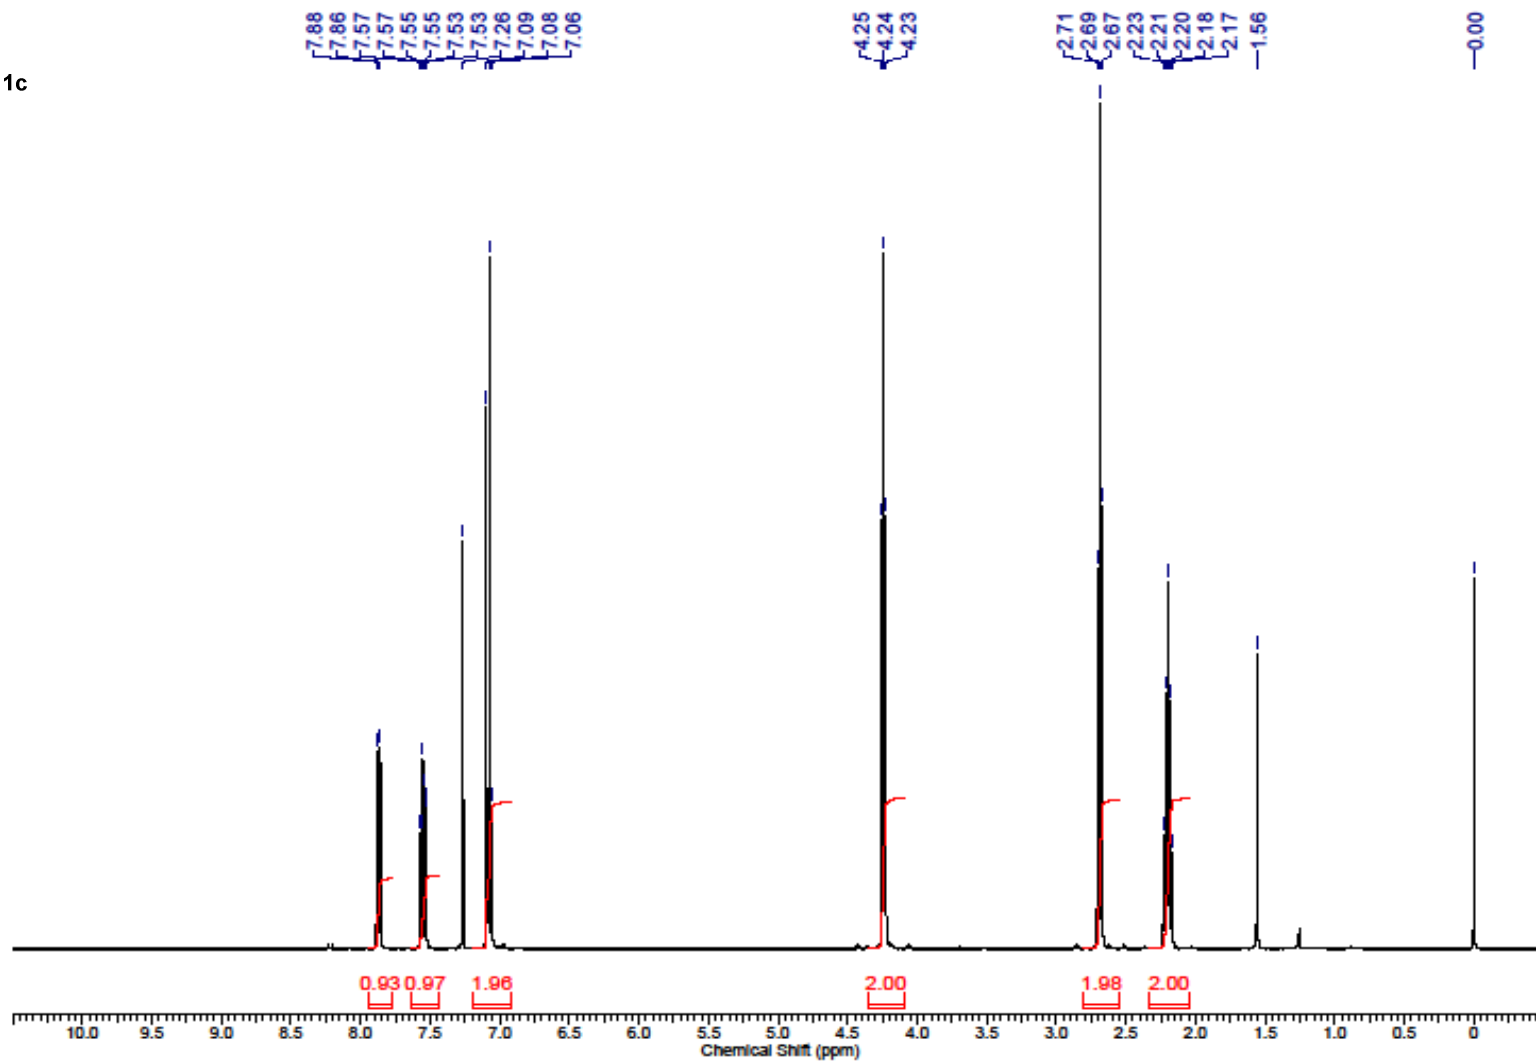

$^{13}\text{C}\{^1\text{H}\}$  NMR spectrum of **1c** in  $\text{CDCl}_3$  with 0.05% v/v TMS (100 MHz)



**1c**

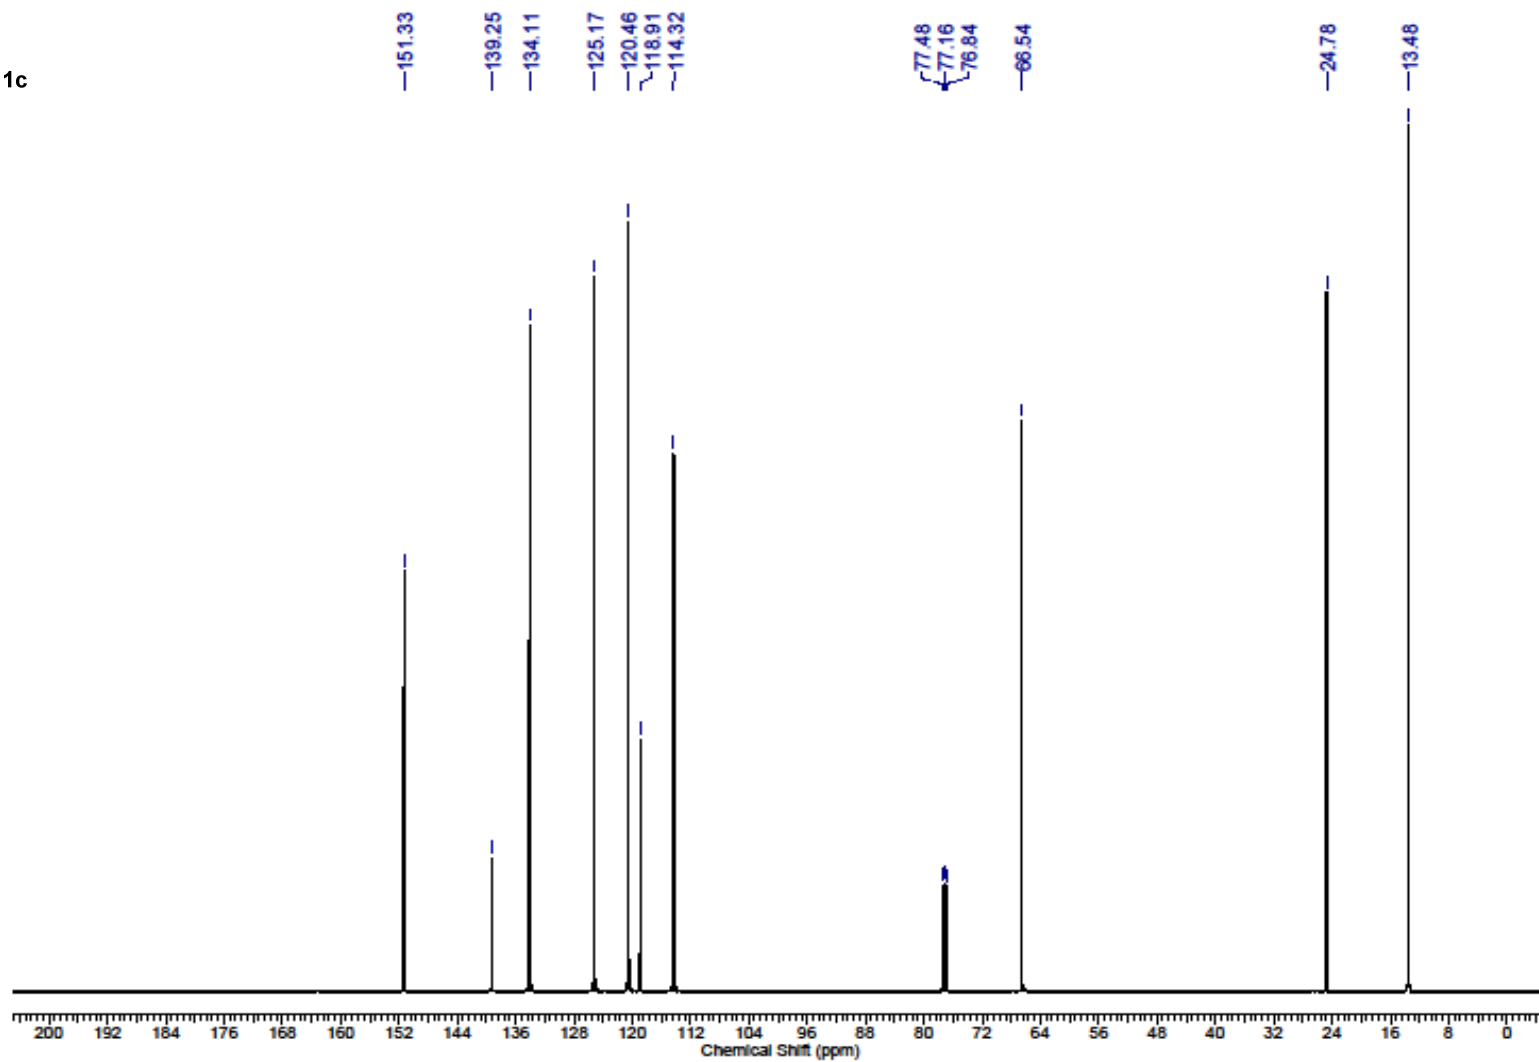

$^1\text{H}$  NMR spectrum of **1d** in  $\text{CDCl}_3$  with 0.05% v/v TMS (400 MHz)

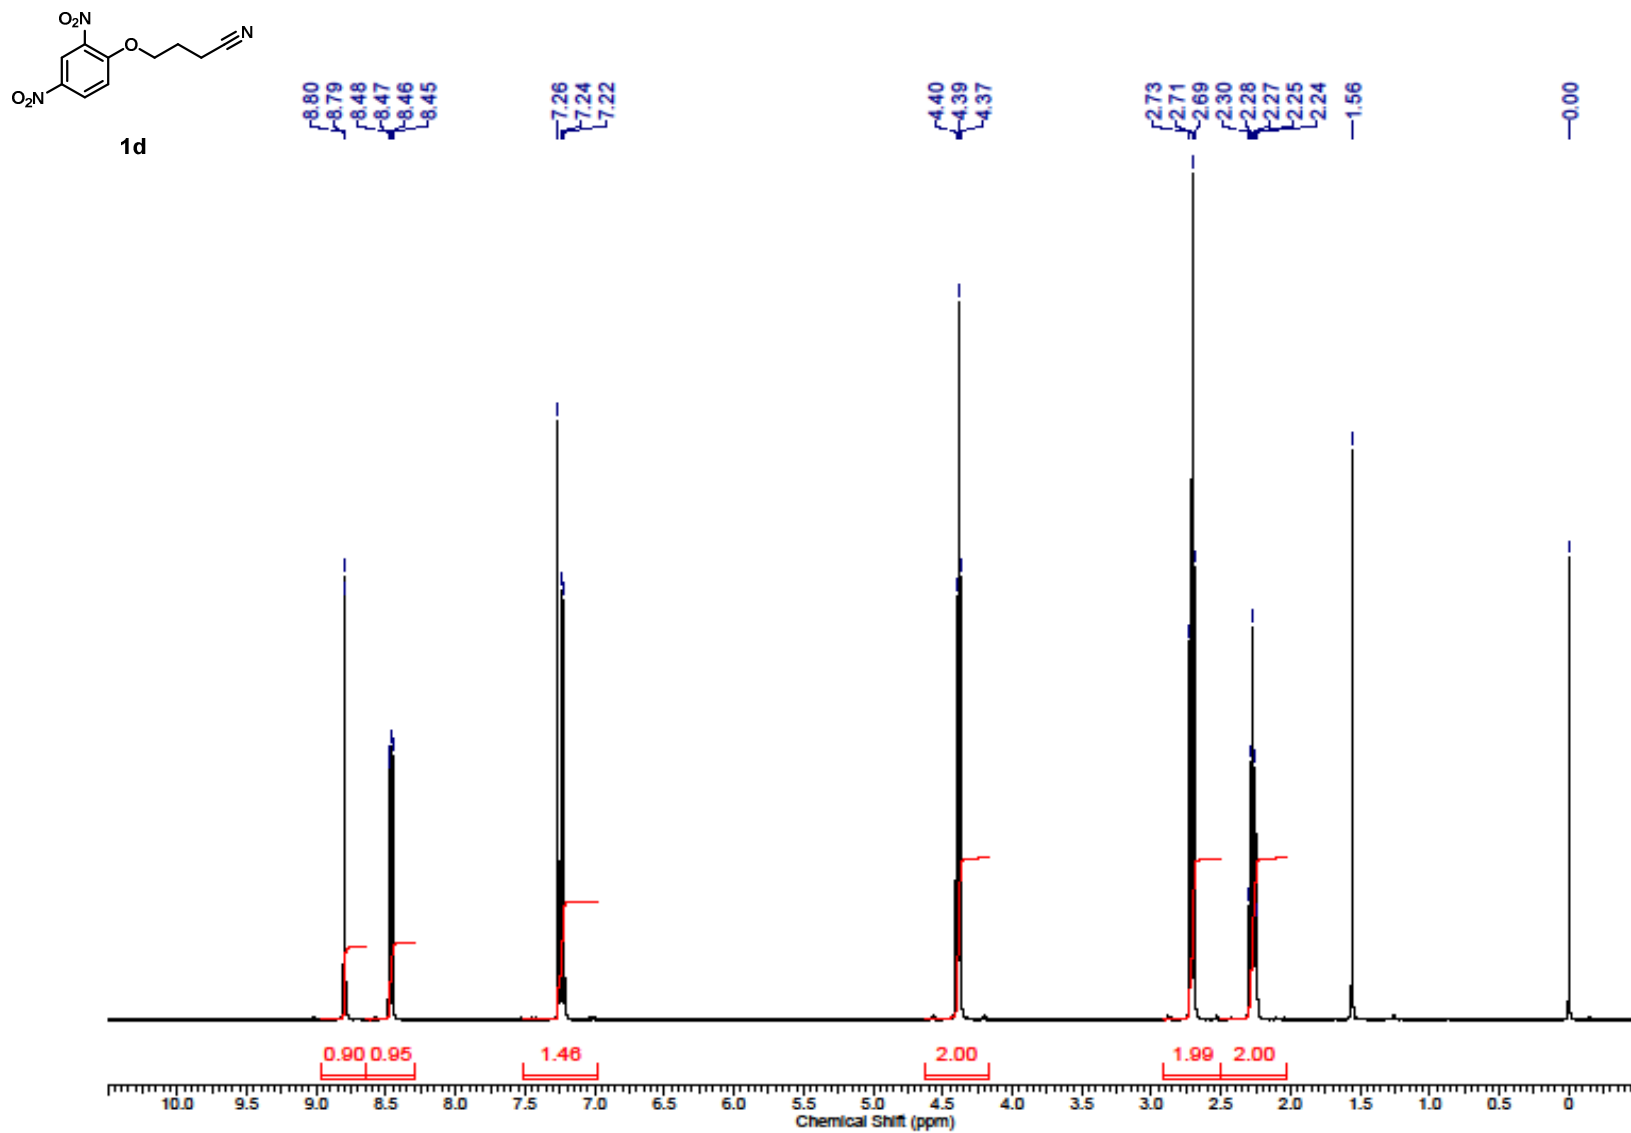

$^{13}\text{C}\{^1\text{H}\}$  NMR spectrum of **1d** in  $\text{CDCl}_3$  with 0.05% v/v TMS (100 MHz)

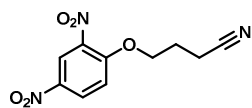

**1d**

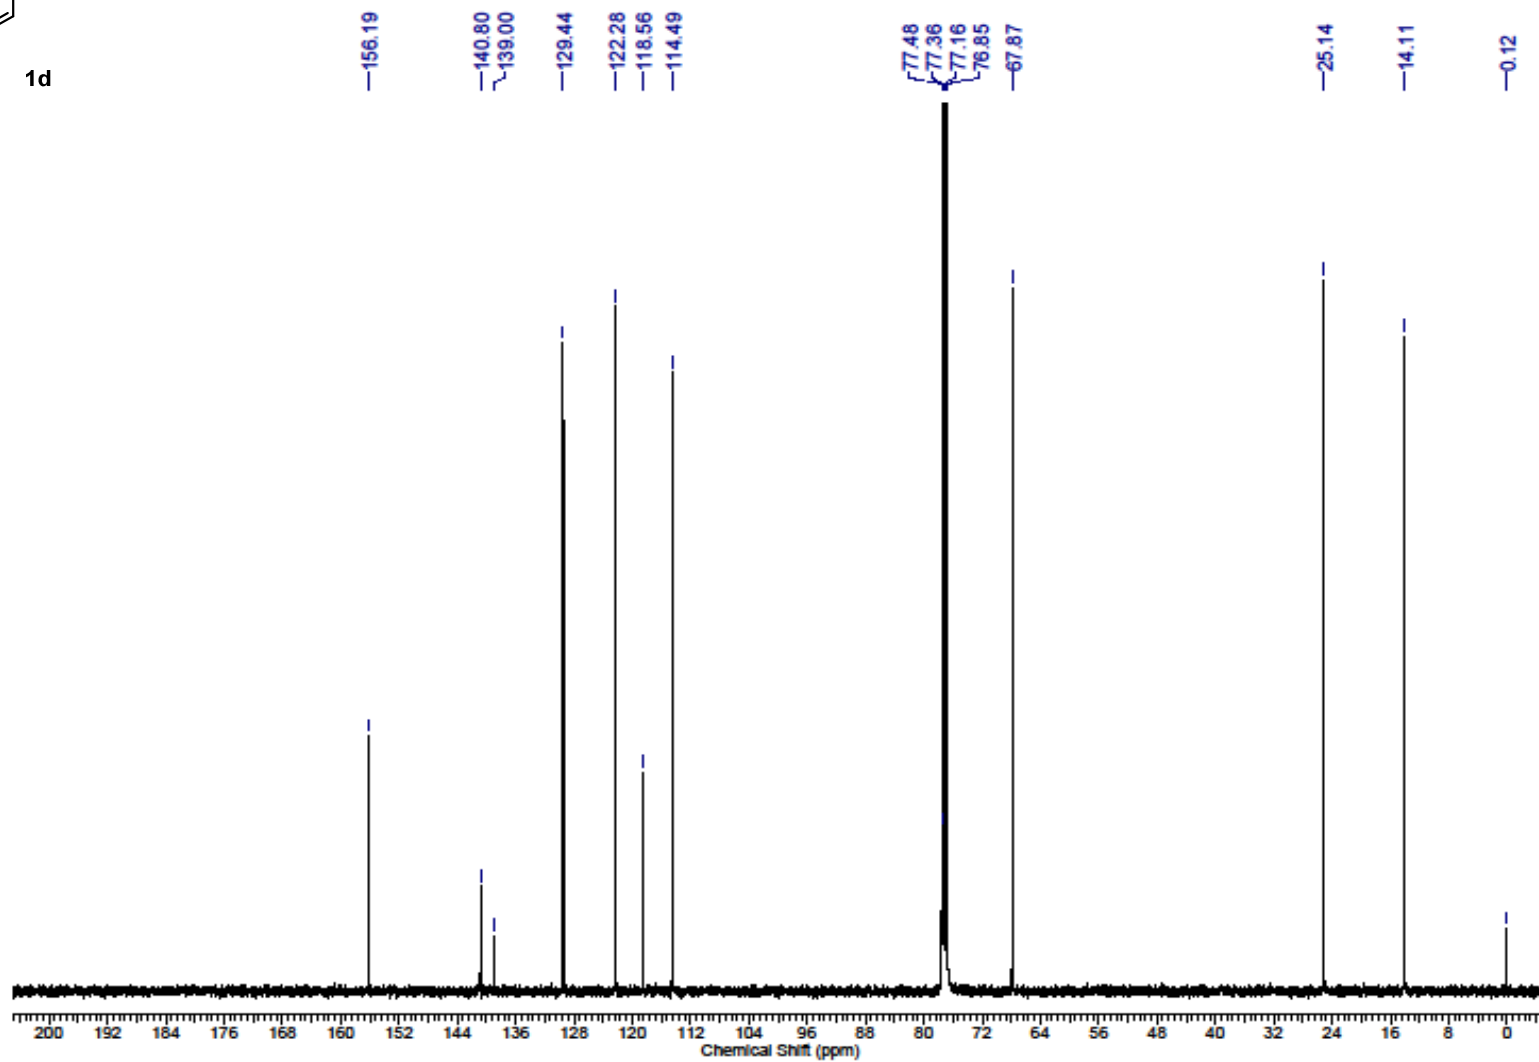

$^1\text{H}$  NMR spectrum of **1e** in  $\text{CDCl}_3$  with 0.05% v/v TMS (400 MHz)

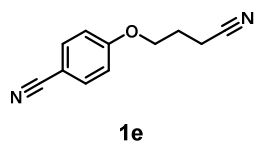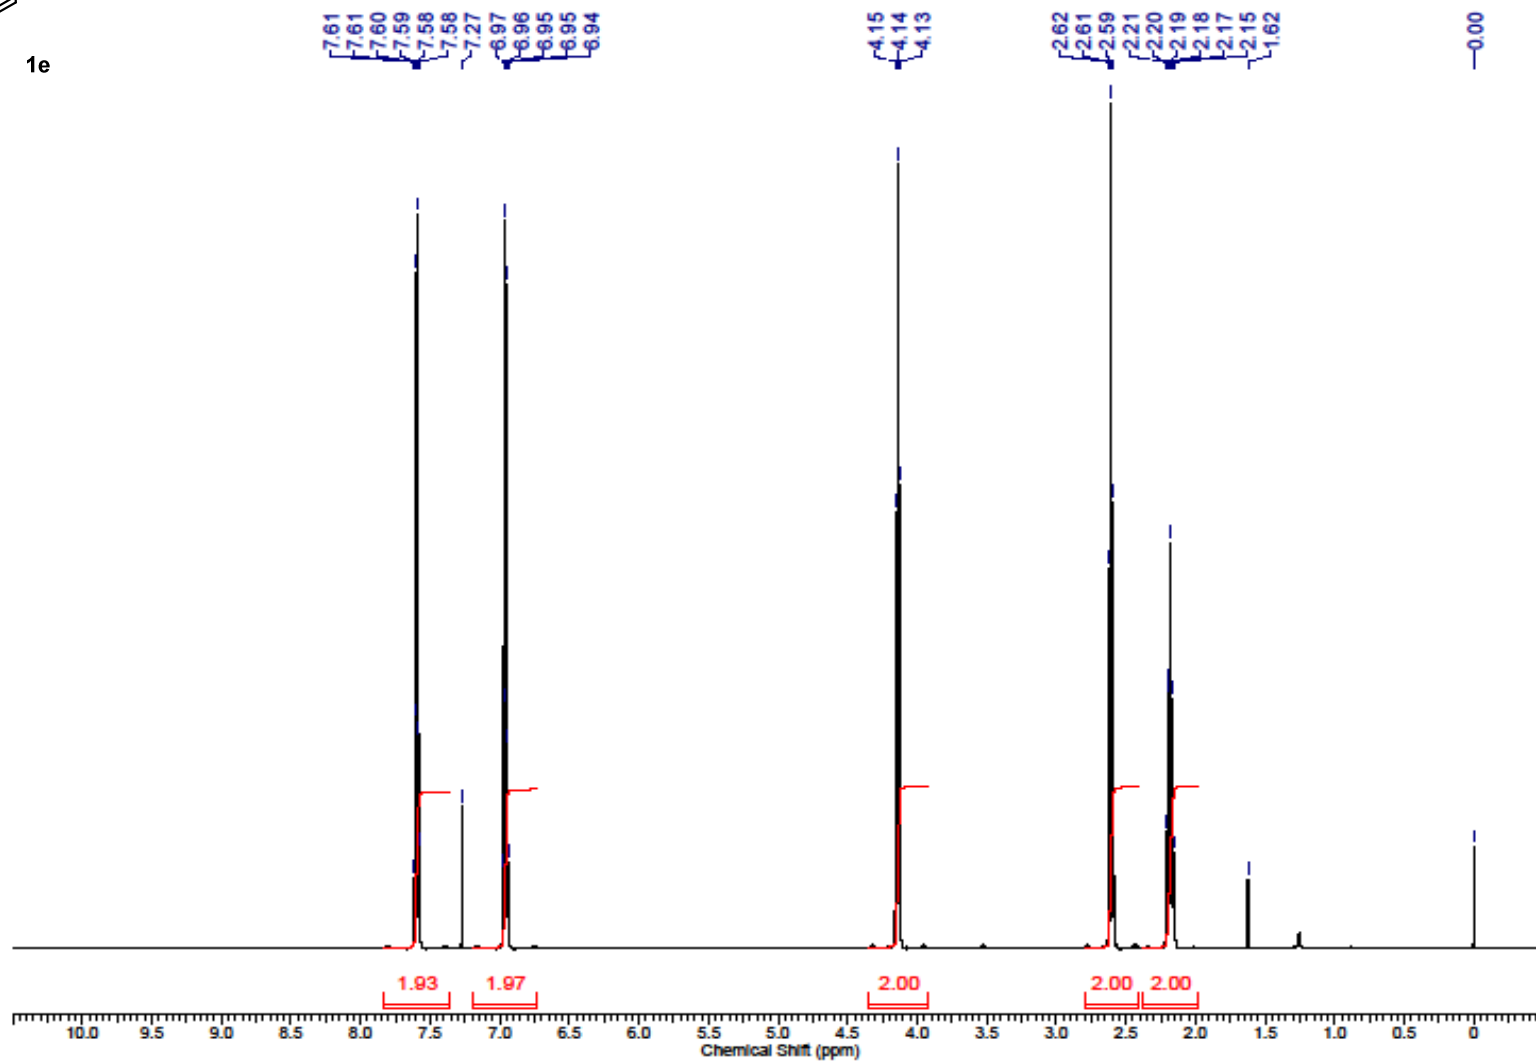

$^{13}\text{C}\{^1\text{H}\}$  NMR spectrum of **1e** in  $\text{CDCl}_3$  with 0.05% v/v TMS (100 MHz)

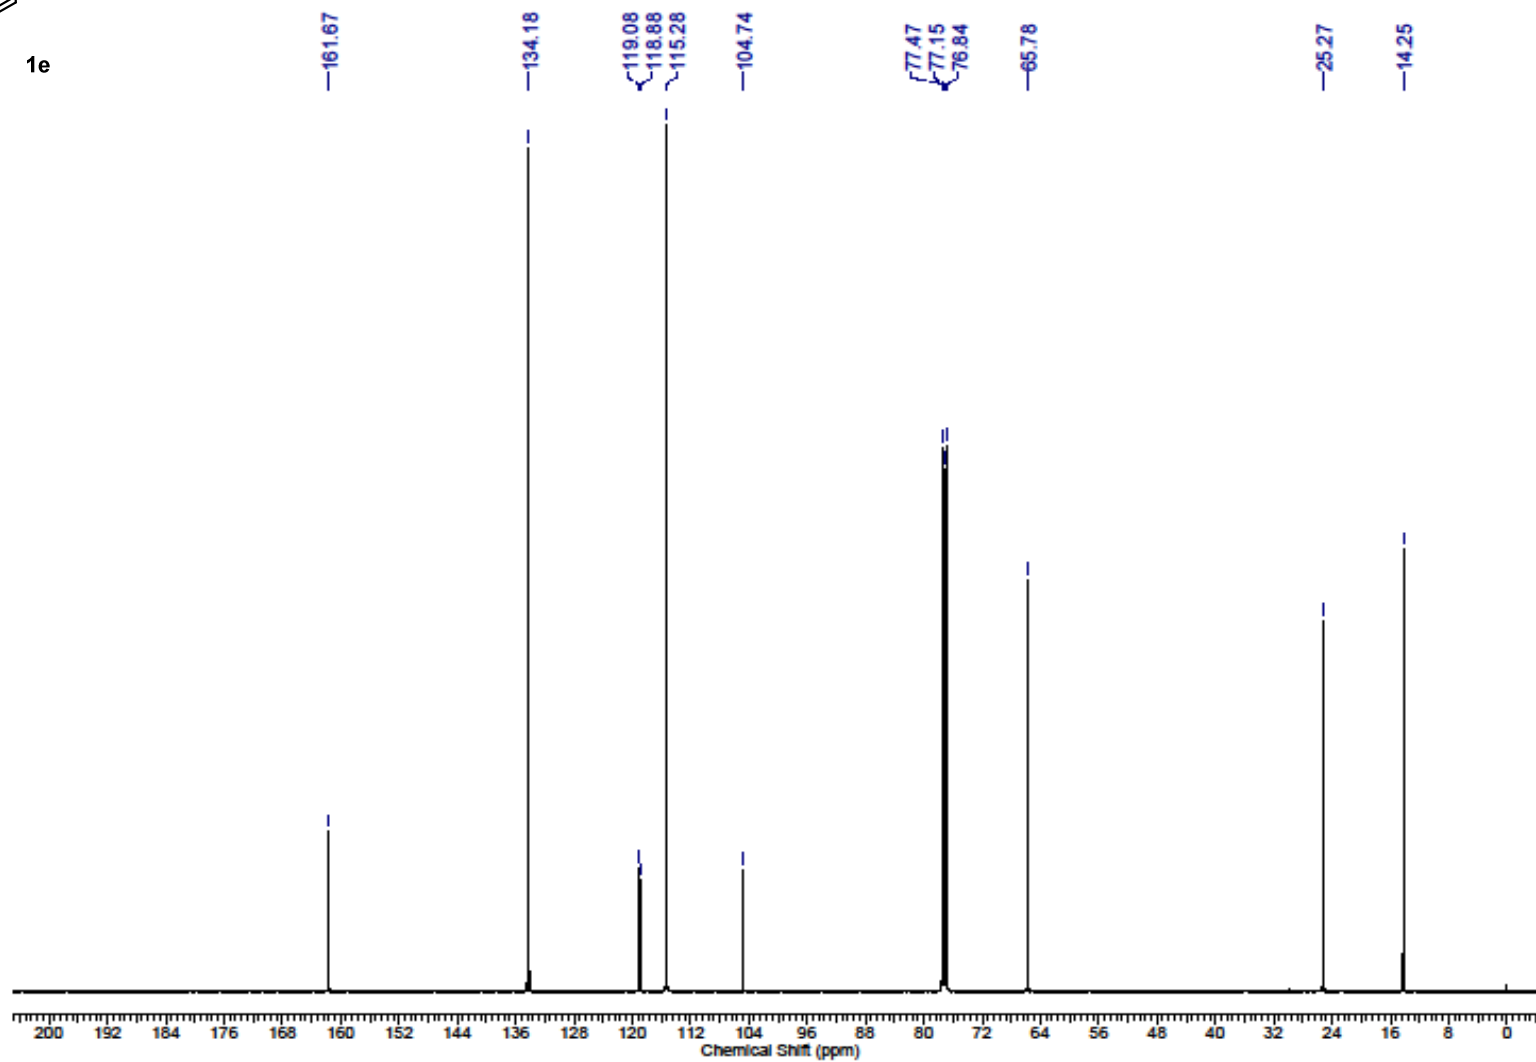



$^1\text{H}$  NMR spectrum of **1f** in  $\text{CDCl}_3$  with 0.05% v/v TMS (400 MHz)

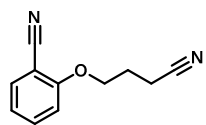

**1f**

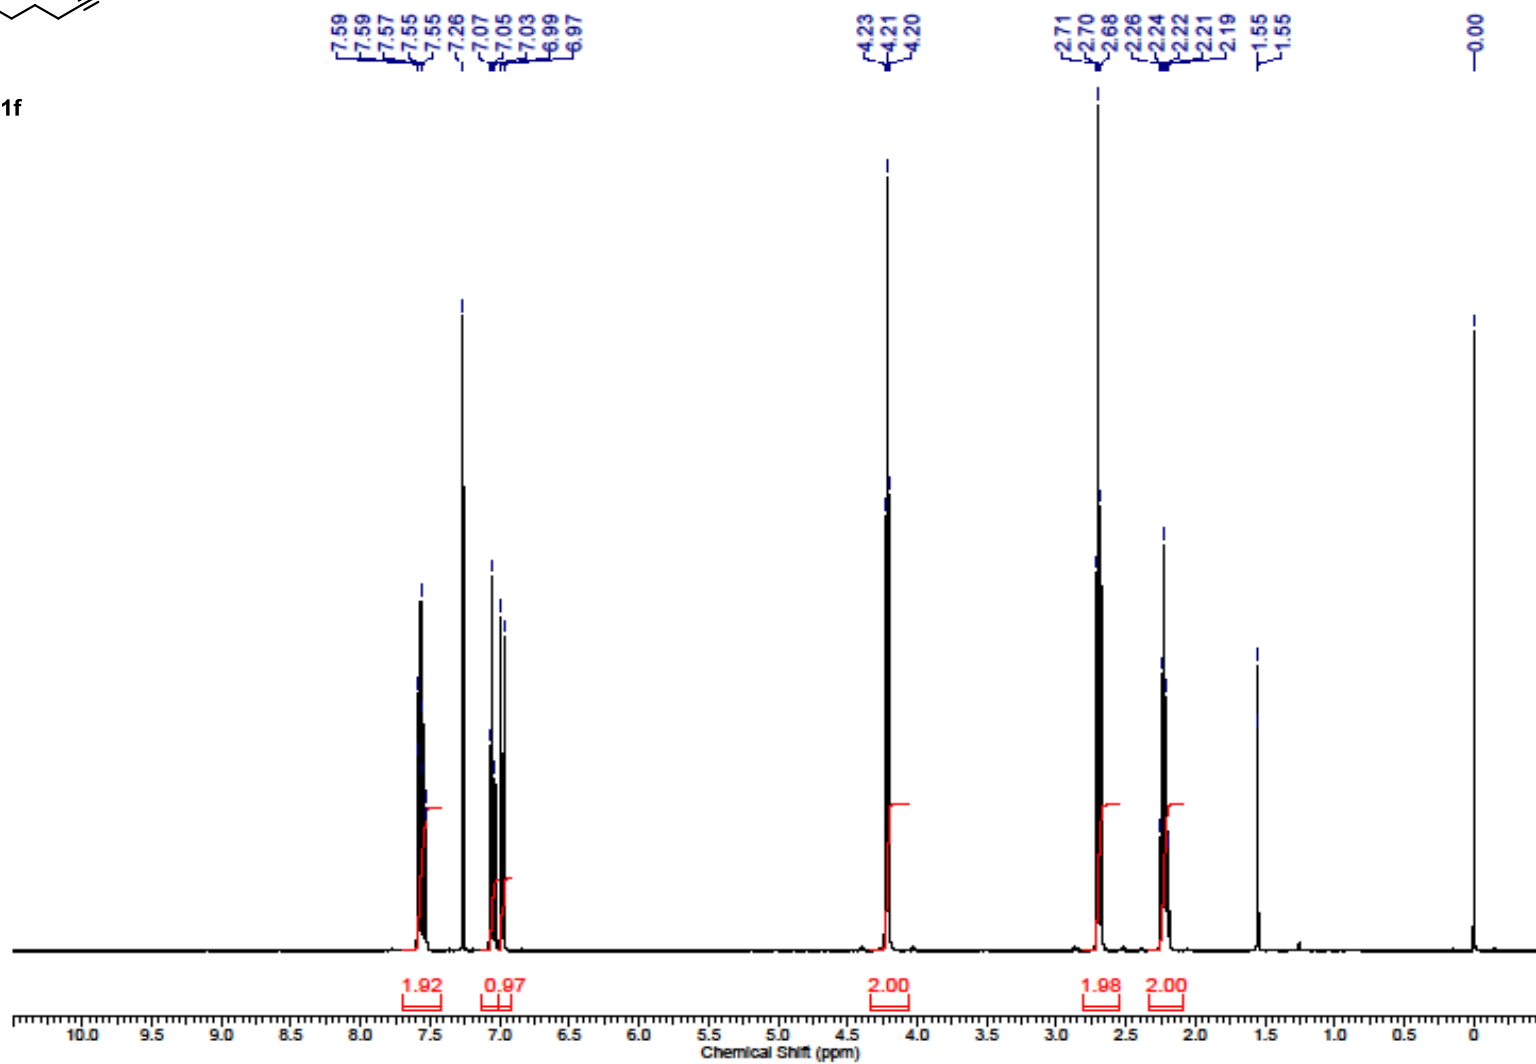

$^{13}\text{C}\{^1\text{H}\}$  NMR spectrum of **1f** in  $\text{CDCl}_3$  with 0.05% v/v TMS (100 MHz)



**1f**

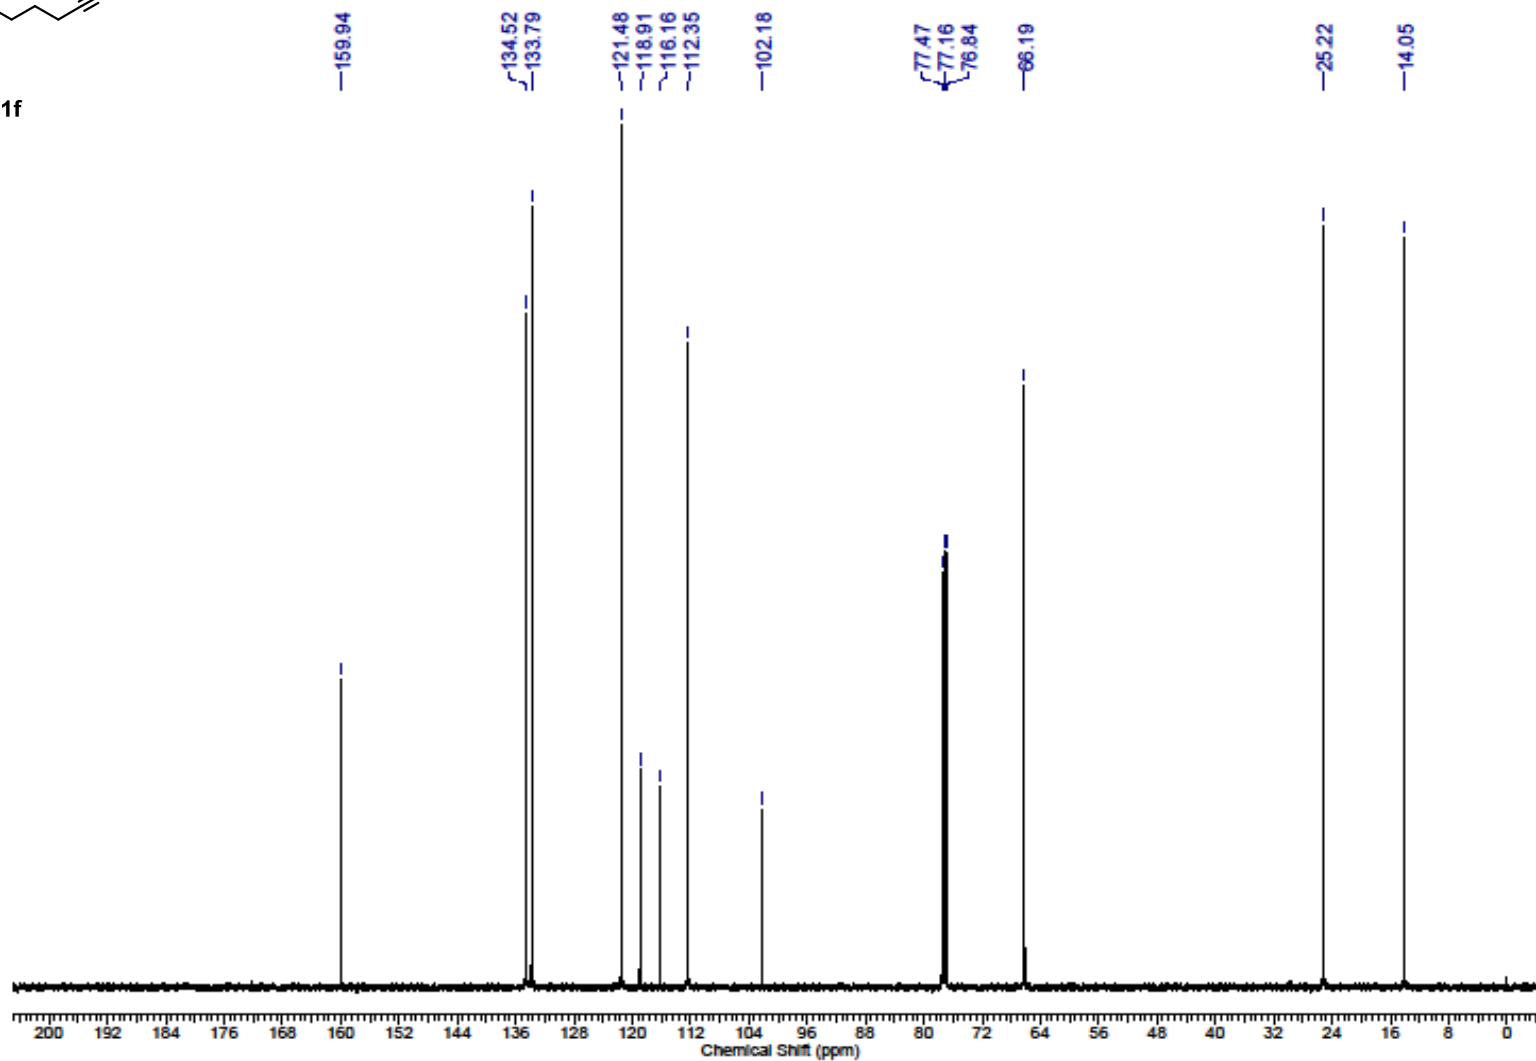

$^1\text{H}$  NMR spectrum of **1g** in  $\text{CDCl}_3$  with 0.05% v/v TMS (400 MHz)

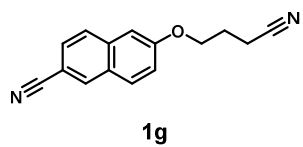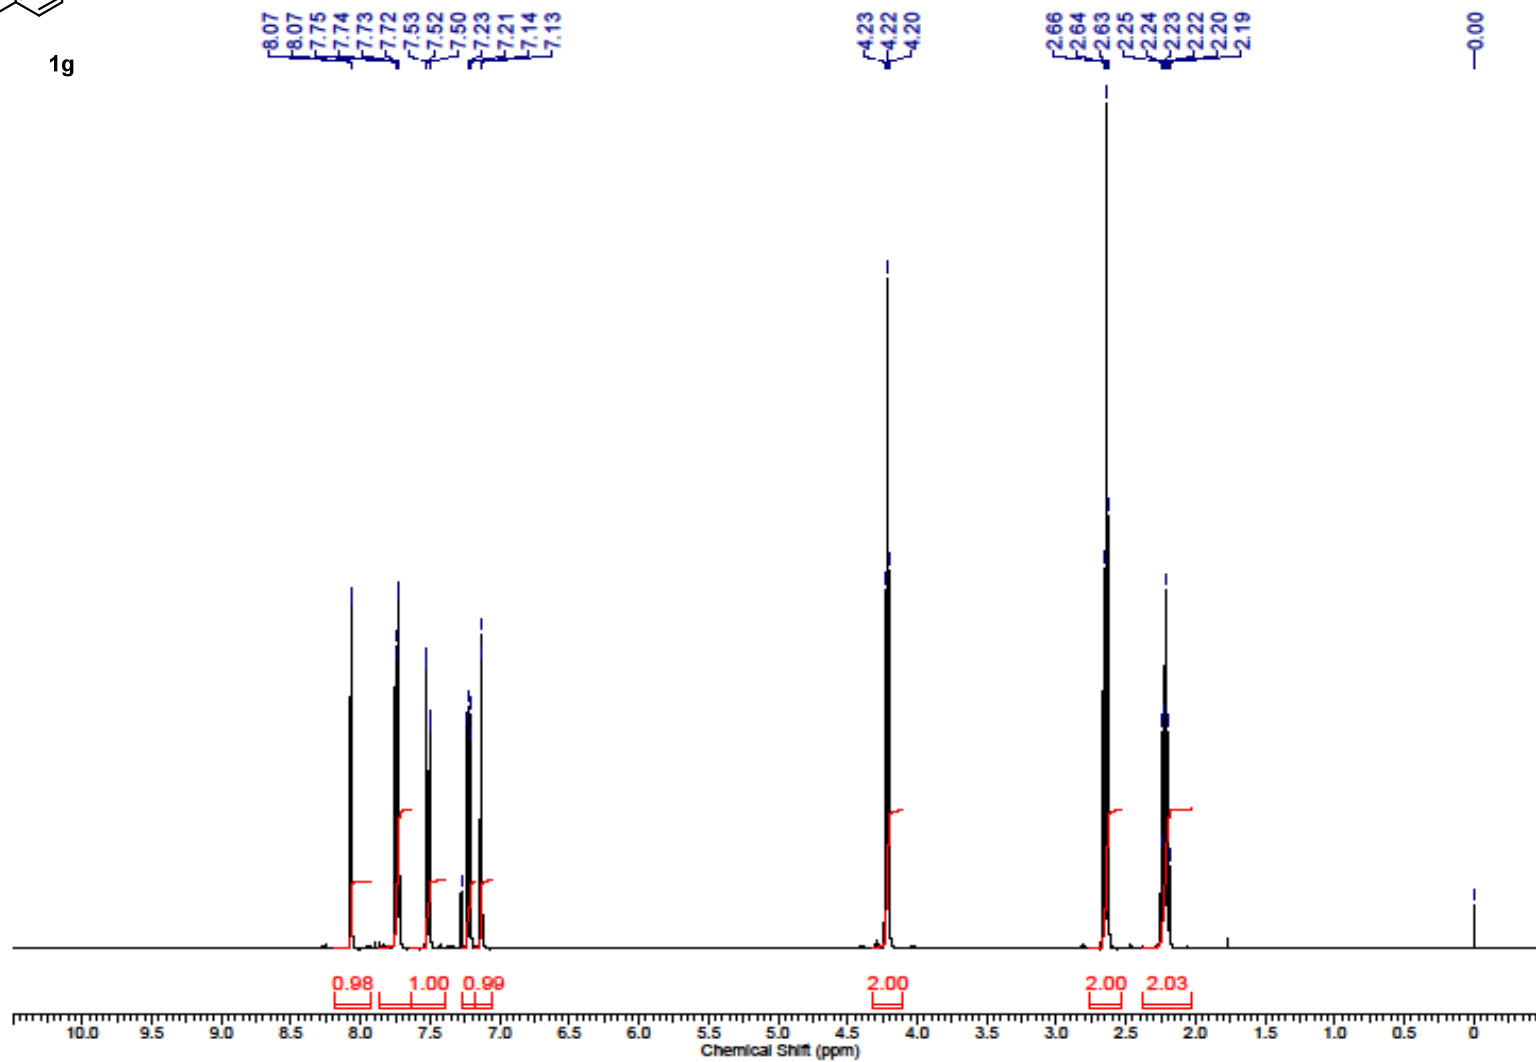

$^{13}\text{C}\{^1\text{H}\}$  NMR spectrum of **1g** in  $\text{CDCl}_3$  with 0.05% v/v TMS (100 MHz)

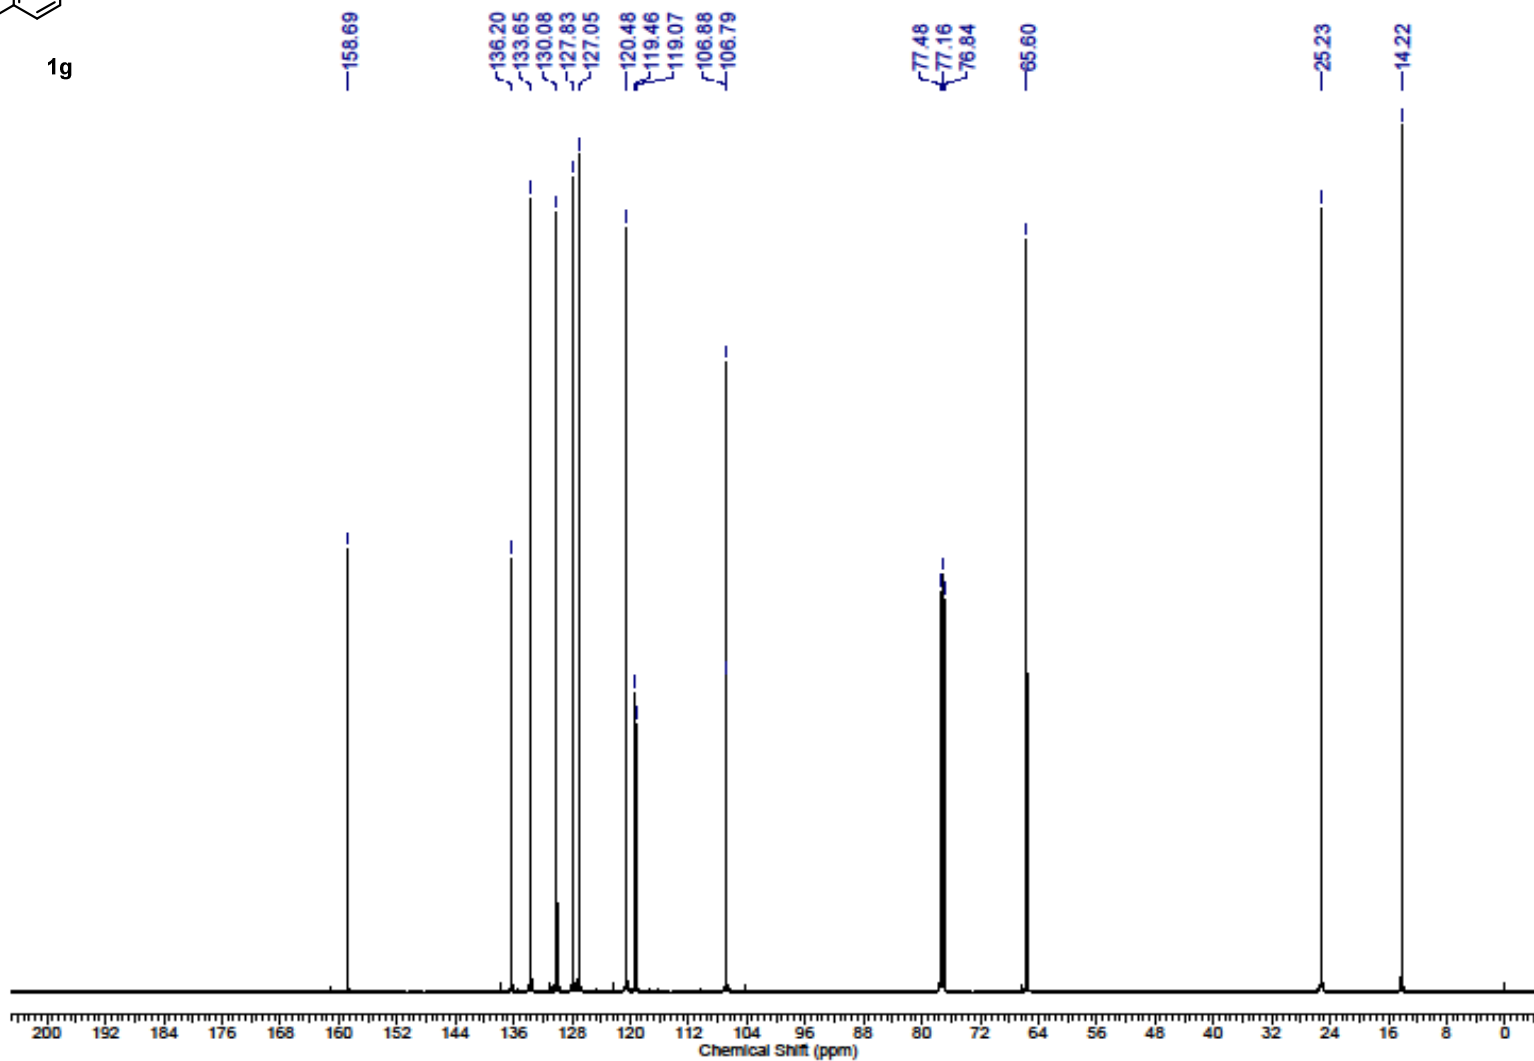

$^1\text{H}$  NMR spectrum of **1h** in  $\text{CDCl}_3$  with 0.05% v/v TMS (400 MHz)

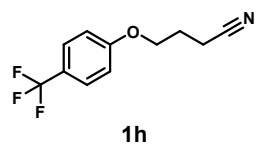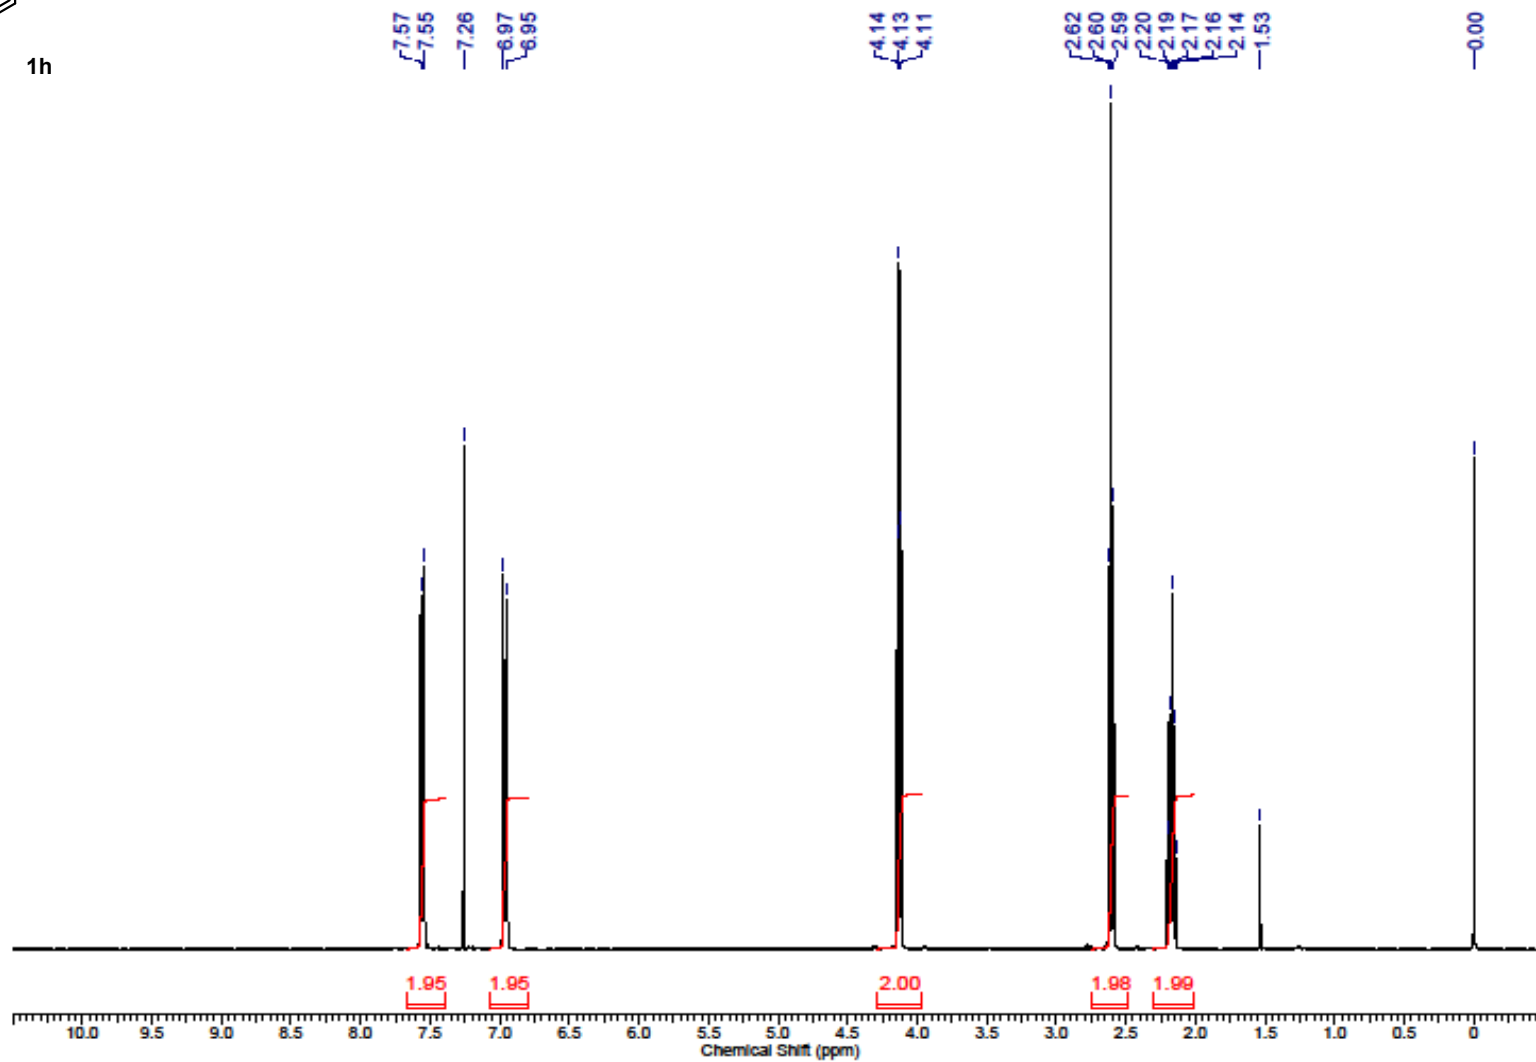

$^{13}\text{C}\{^1\text{H}\}$  NMR spectrum of **1h** in  $\text{CDCl}_3$  with 0.05% v/v TMS (100 MHz)

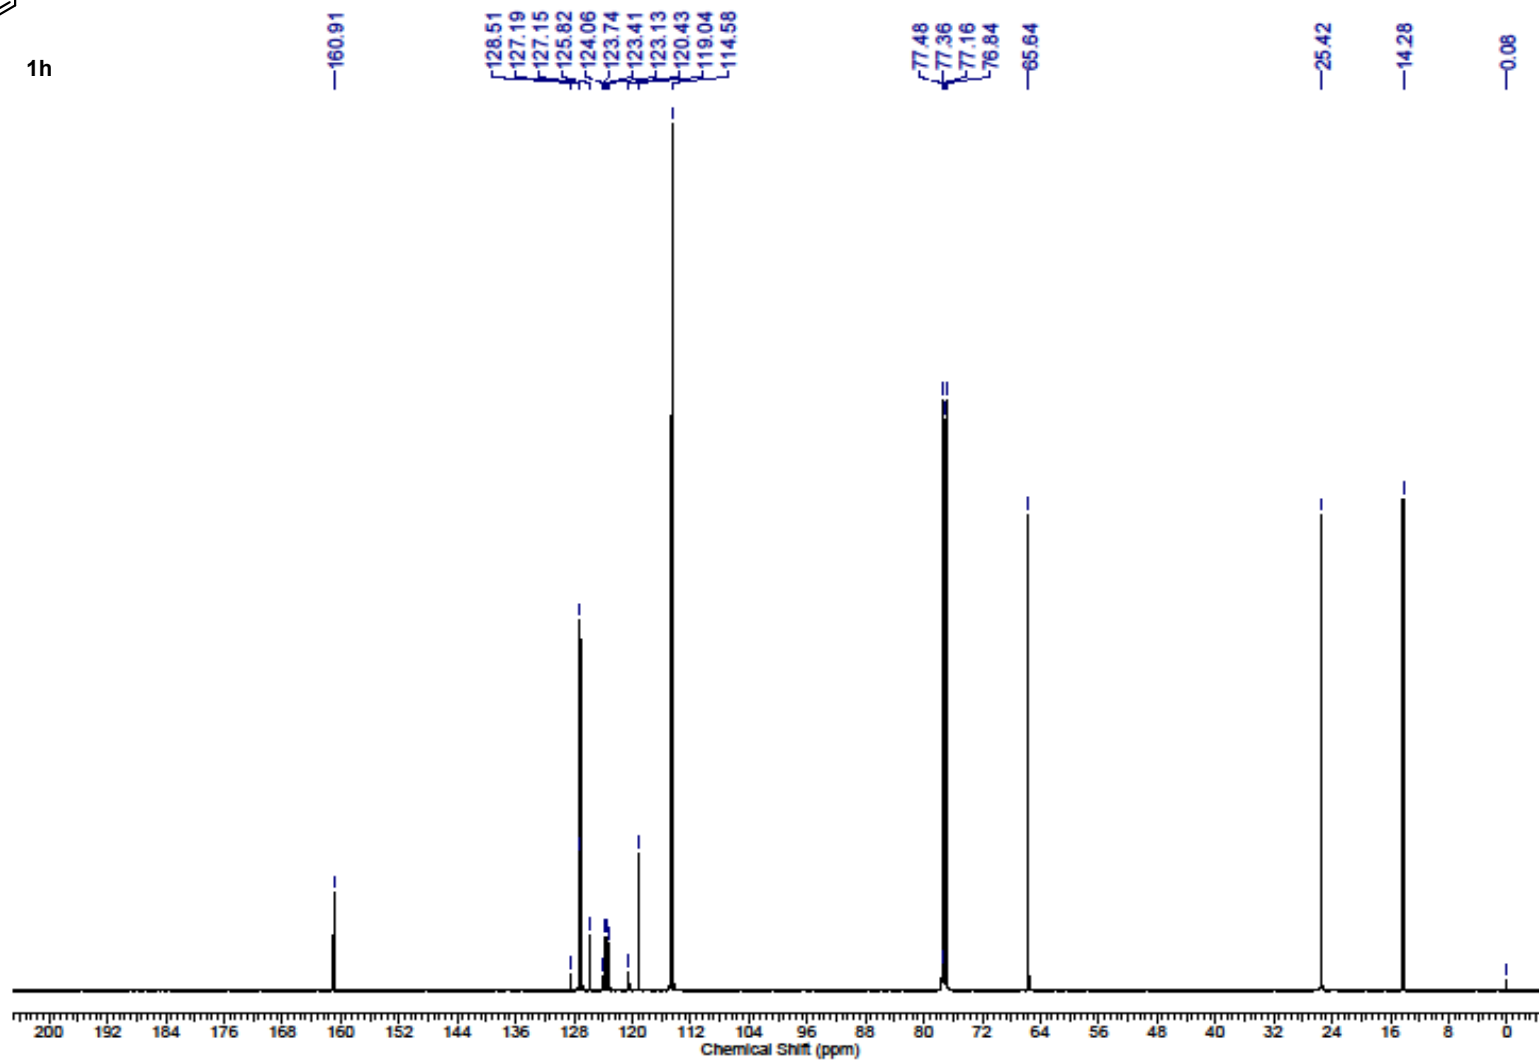

$^1\text{H}$  NMR spectrum of **1i** in  $\text{CDCl}_3$  with 0.05% v/v TMS (400 MHz)

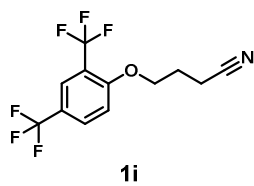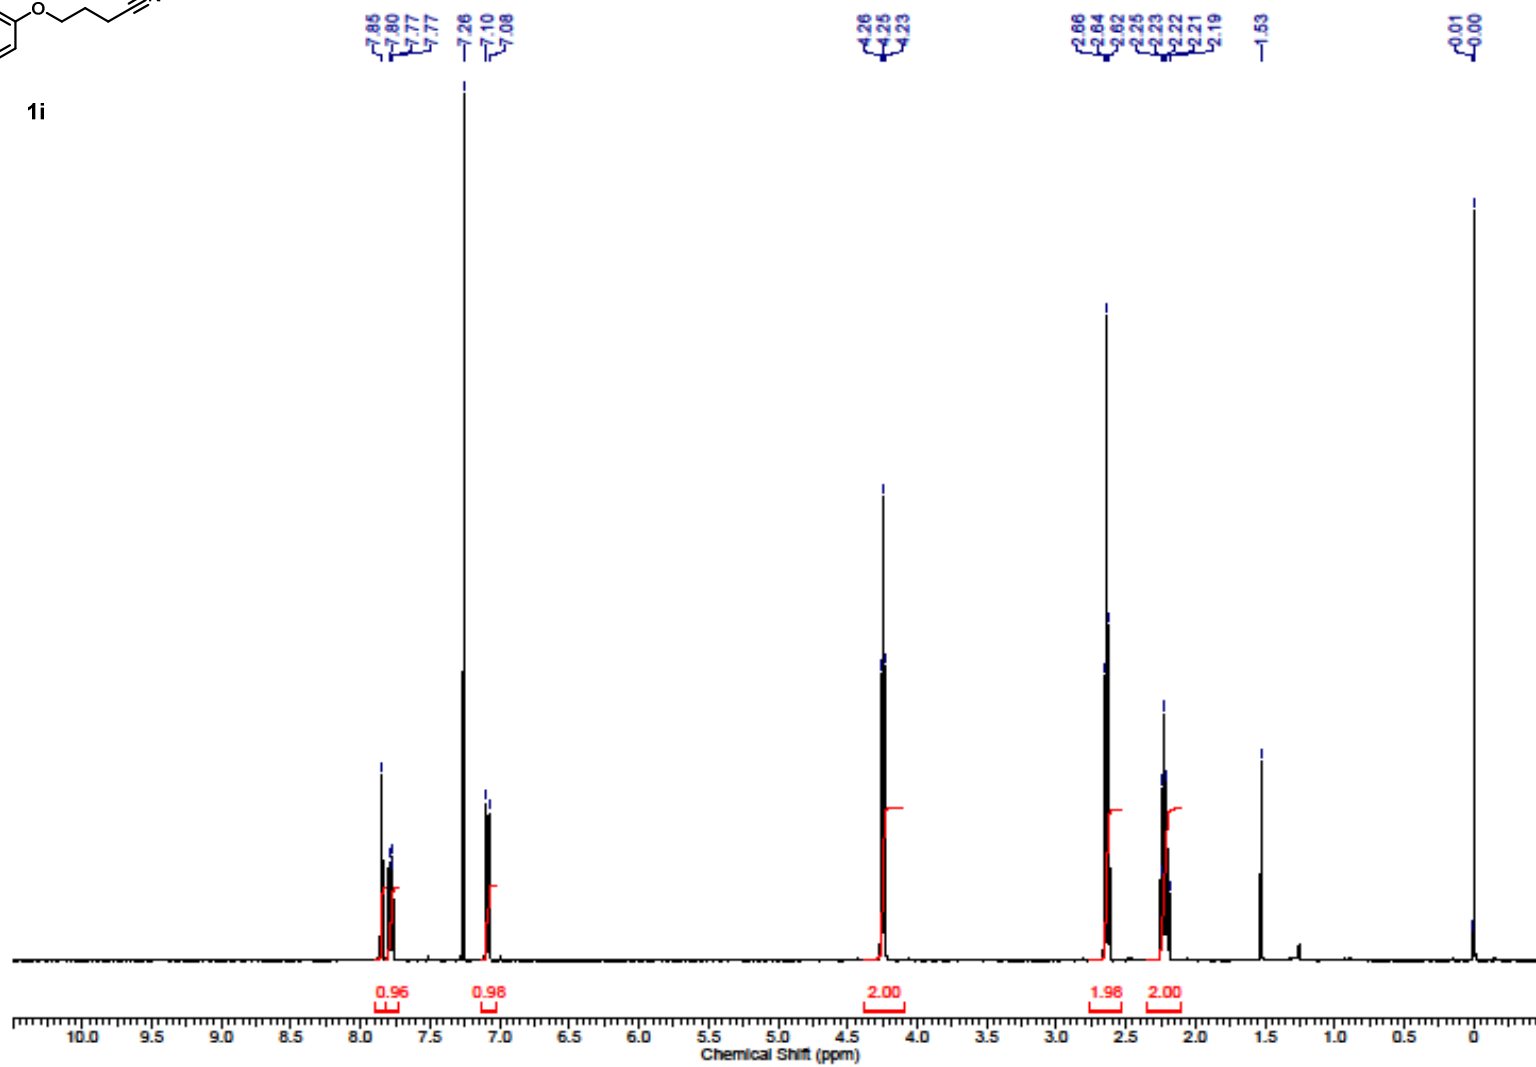

$^{13}\text{C}\{^1\text{H}\}$  NMR spectrum of **1i** in  $\text{CDCl}_3$  with 0.05% v/v TMS (100 MHz)

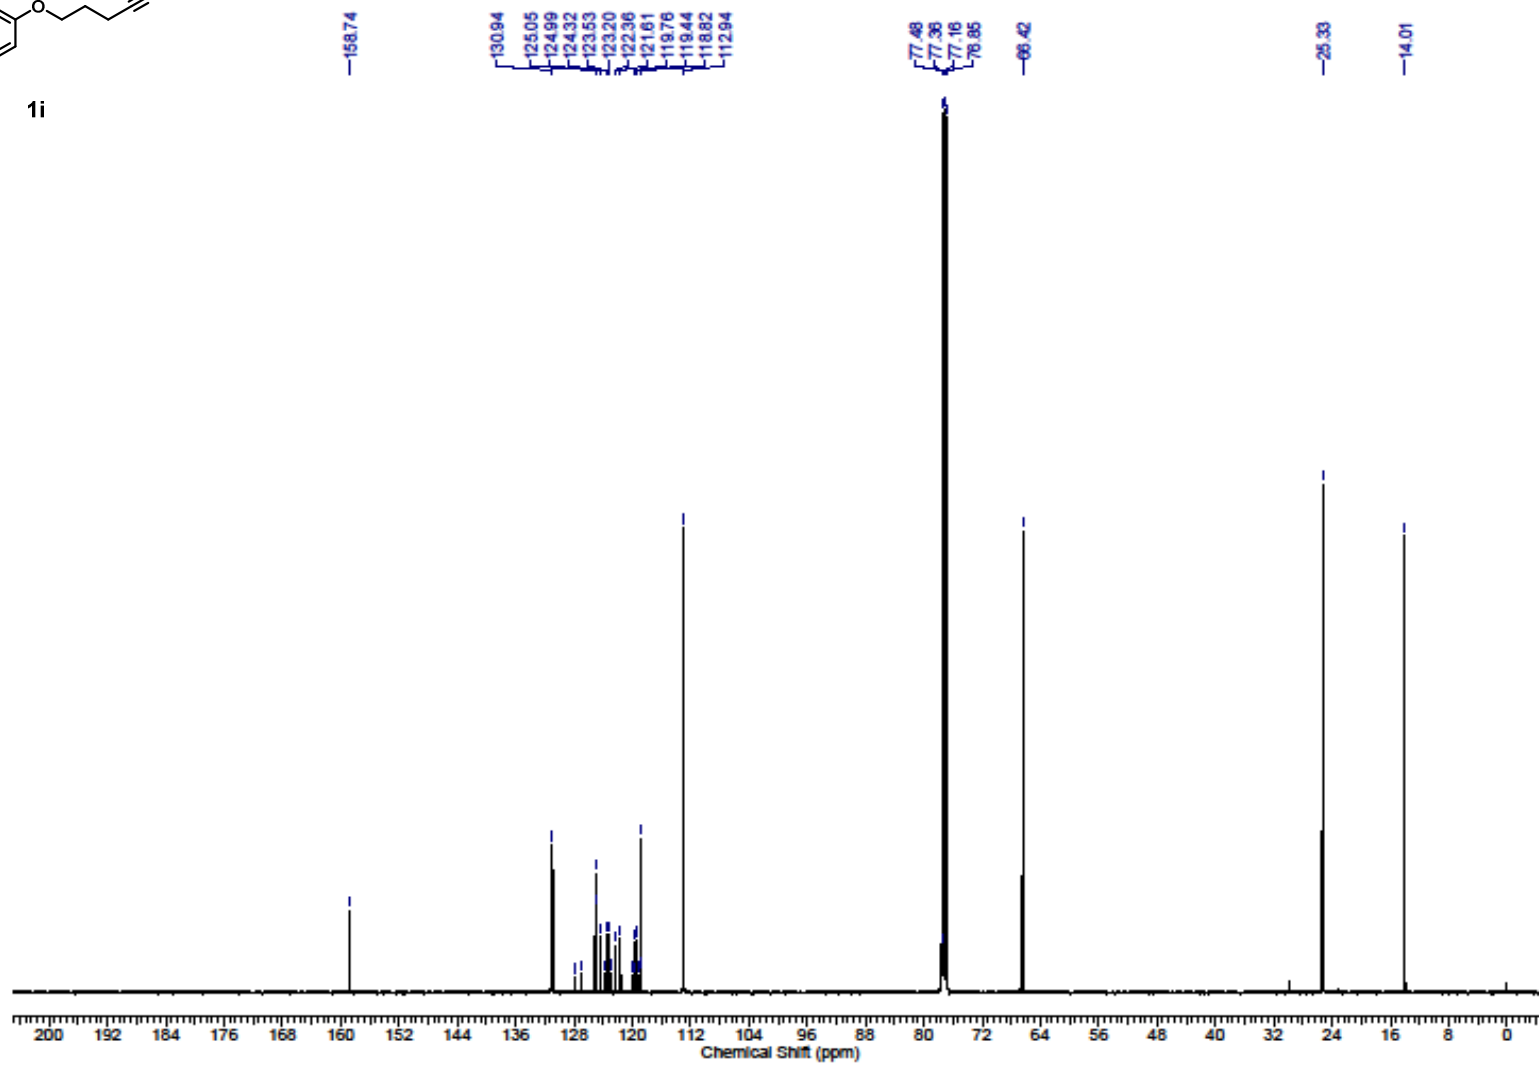



$^1\text{H}$  NMR spectrum of **1j** in  $\text{CDCl}_3$  with 0.05% v/v TMS (400 MHz)

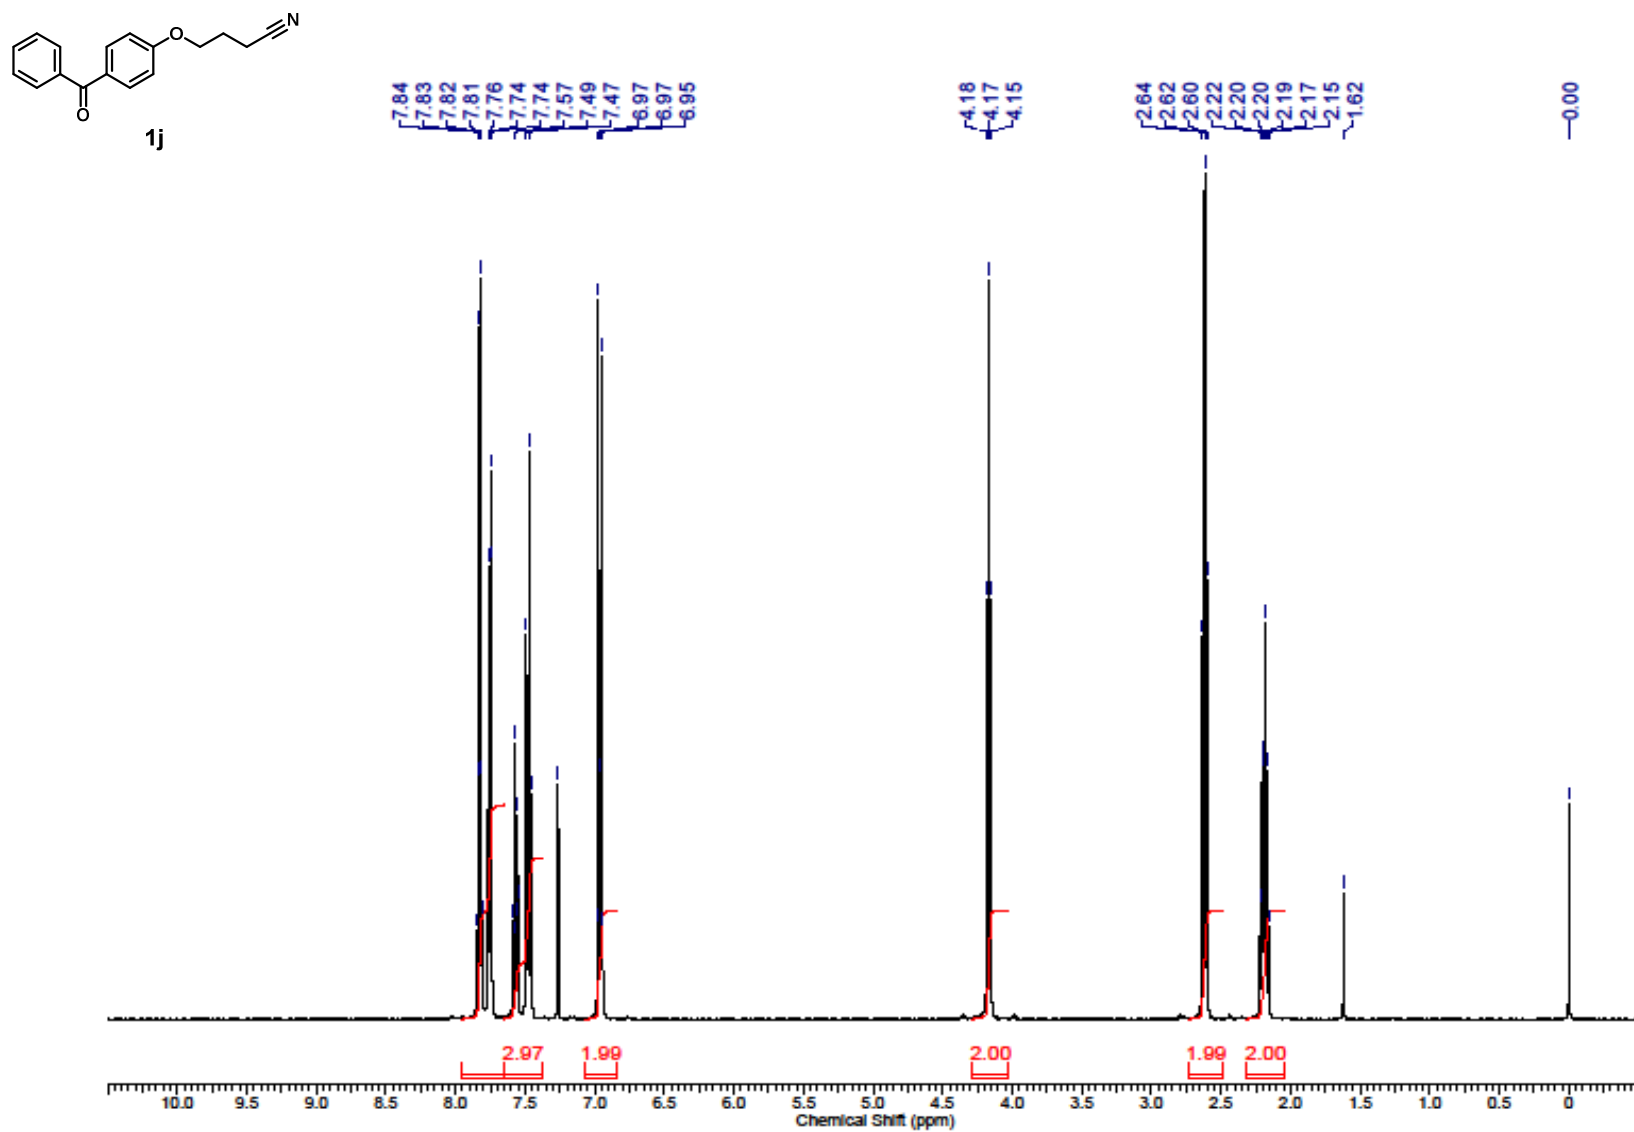

$^{13}\text{C}\{^1\text{H}\}$  NMR spectrum of **1j** in  $\text{CDCl}_3$  with 0.05% v/v TMS (100 MHz)

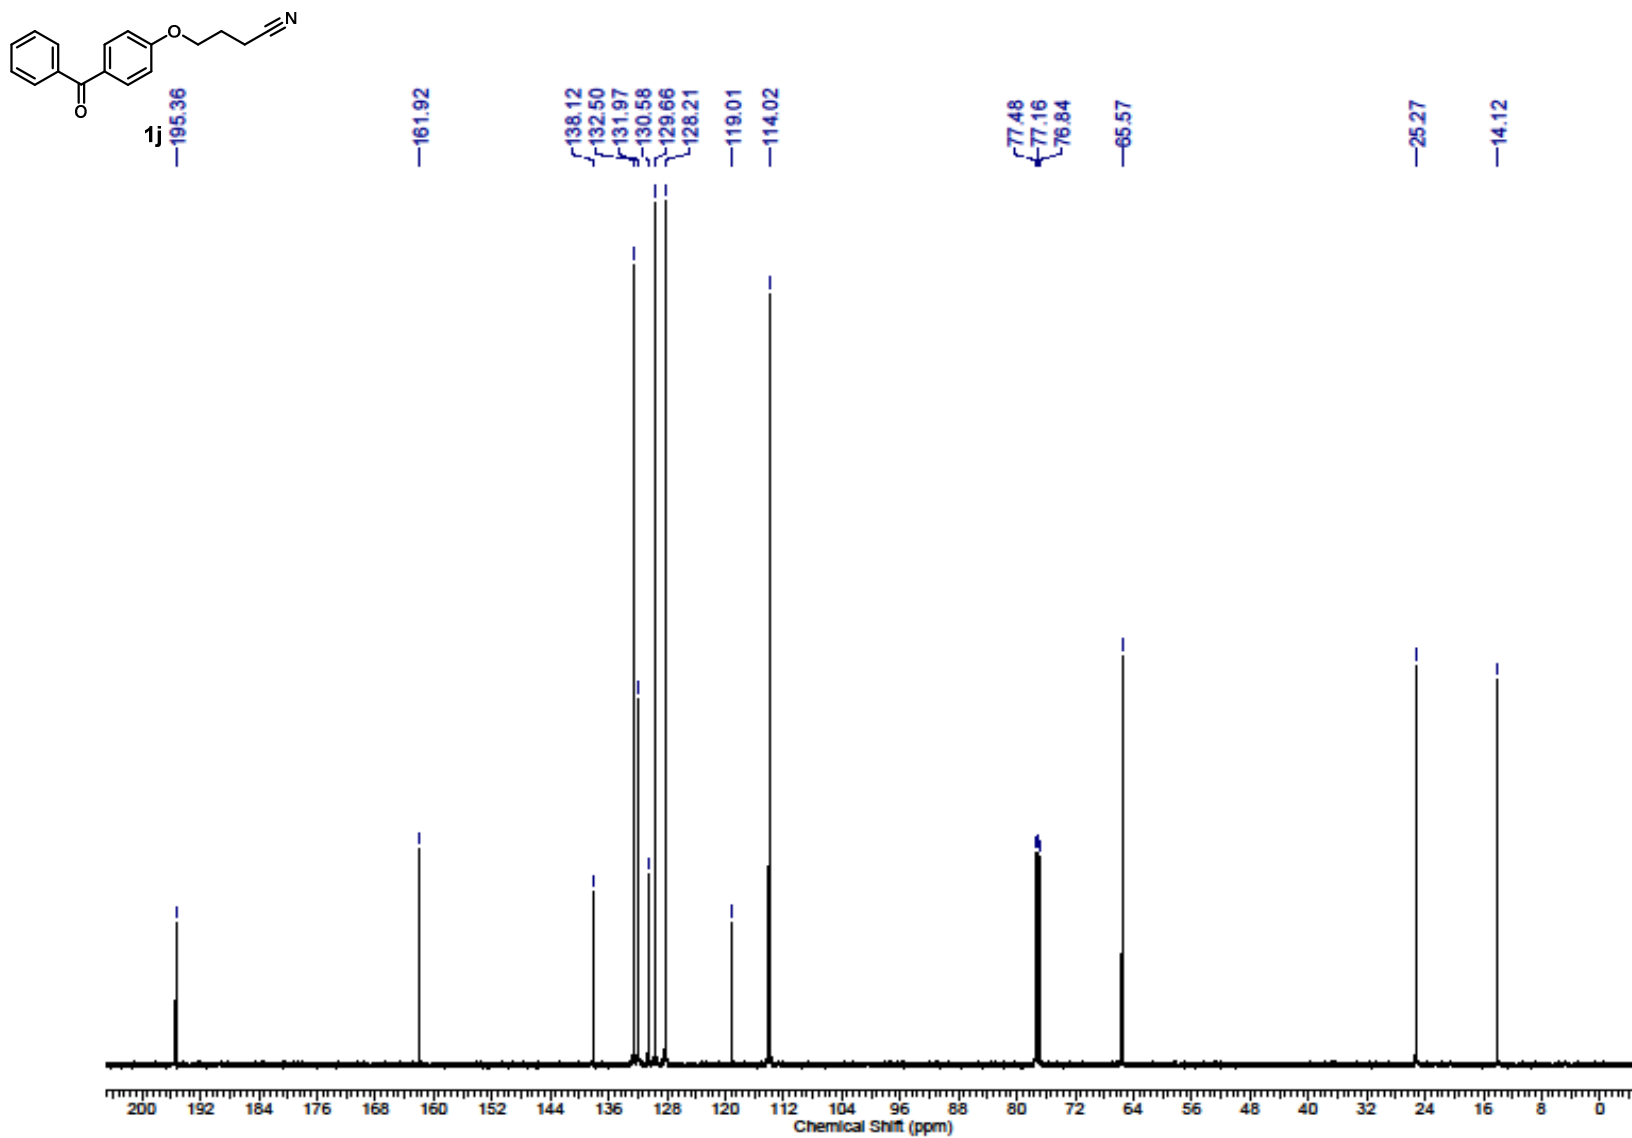

$^1\text{H}$  NMR spectrum of **1k** in  $\text{CDCl}_3$  with 0.05% v/v TMS (400 MHz)

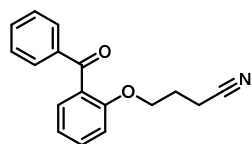

**1k**

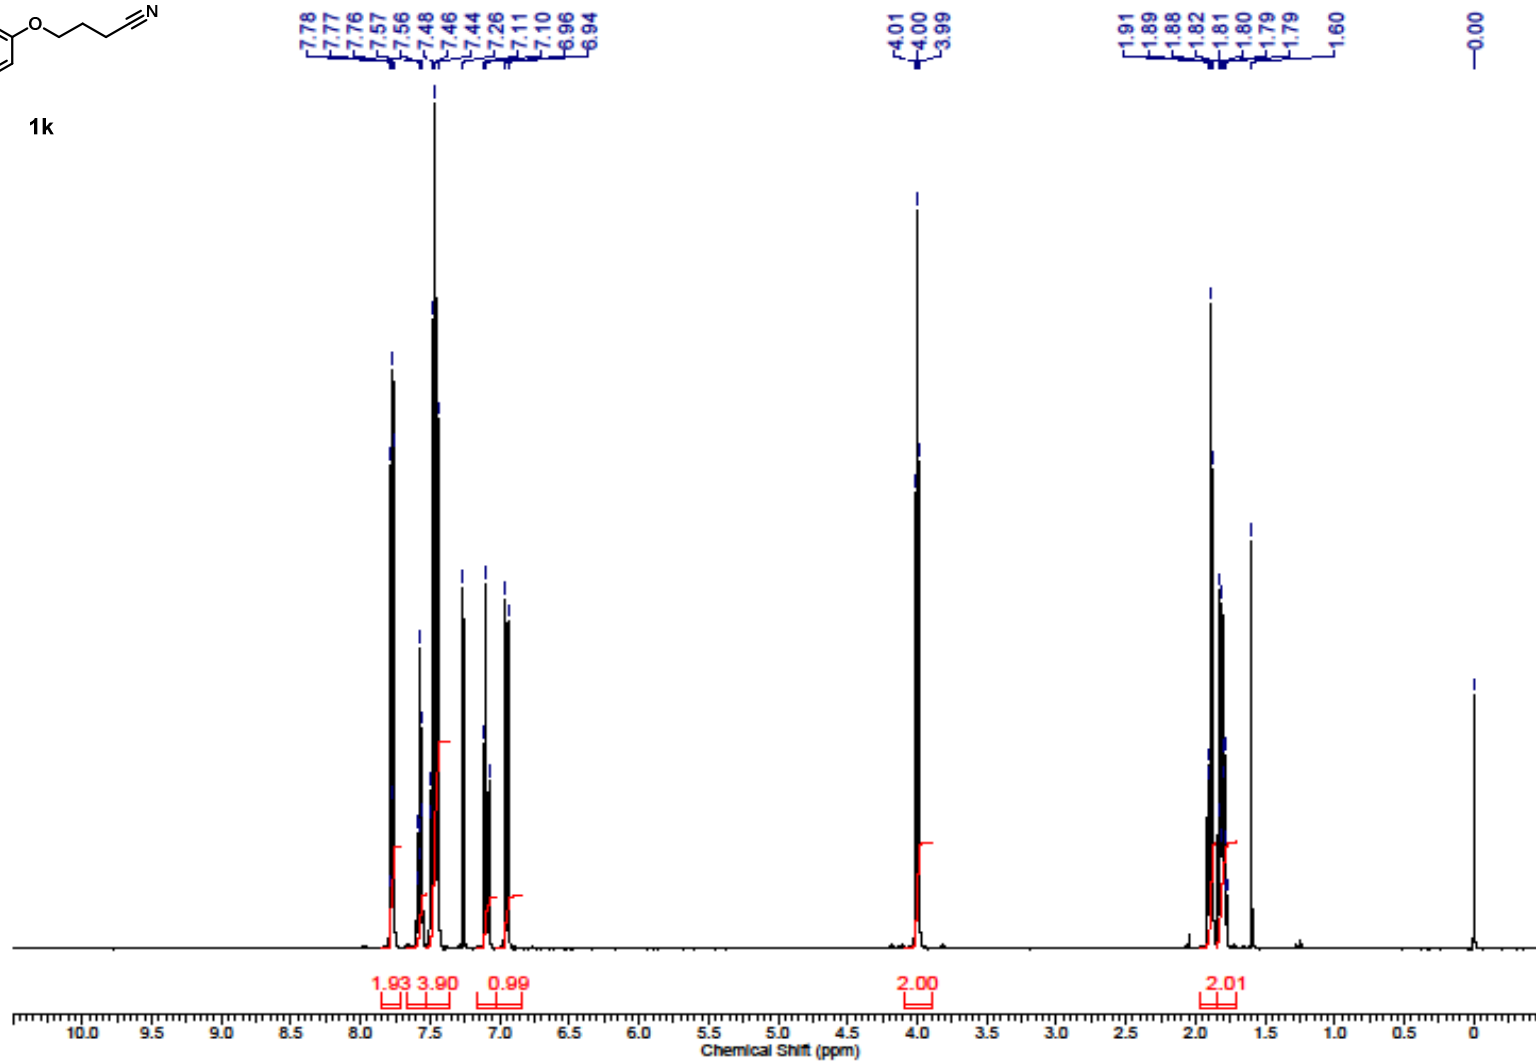

$^{13}\text{C}\{^1\text{H}\}$  NMR spectrum of **1k** in  $\text{CDCl}_3$  with 0.05% v/v TMS (100 MHz)

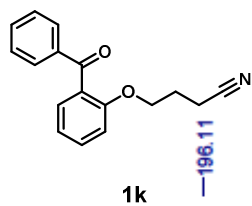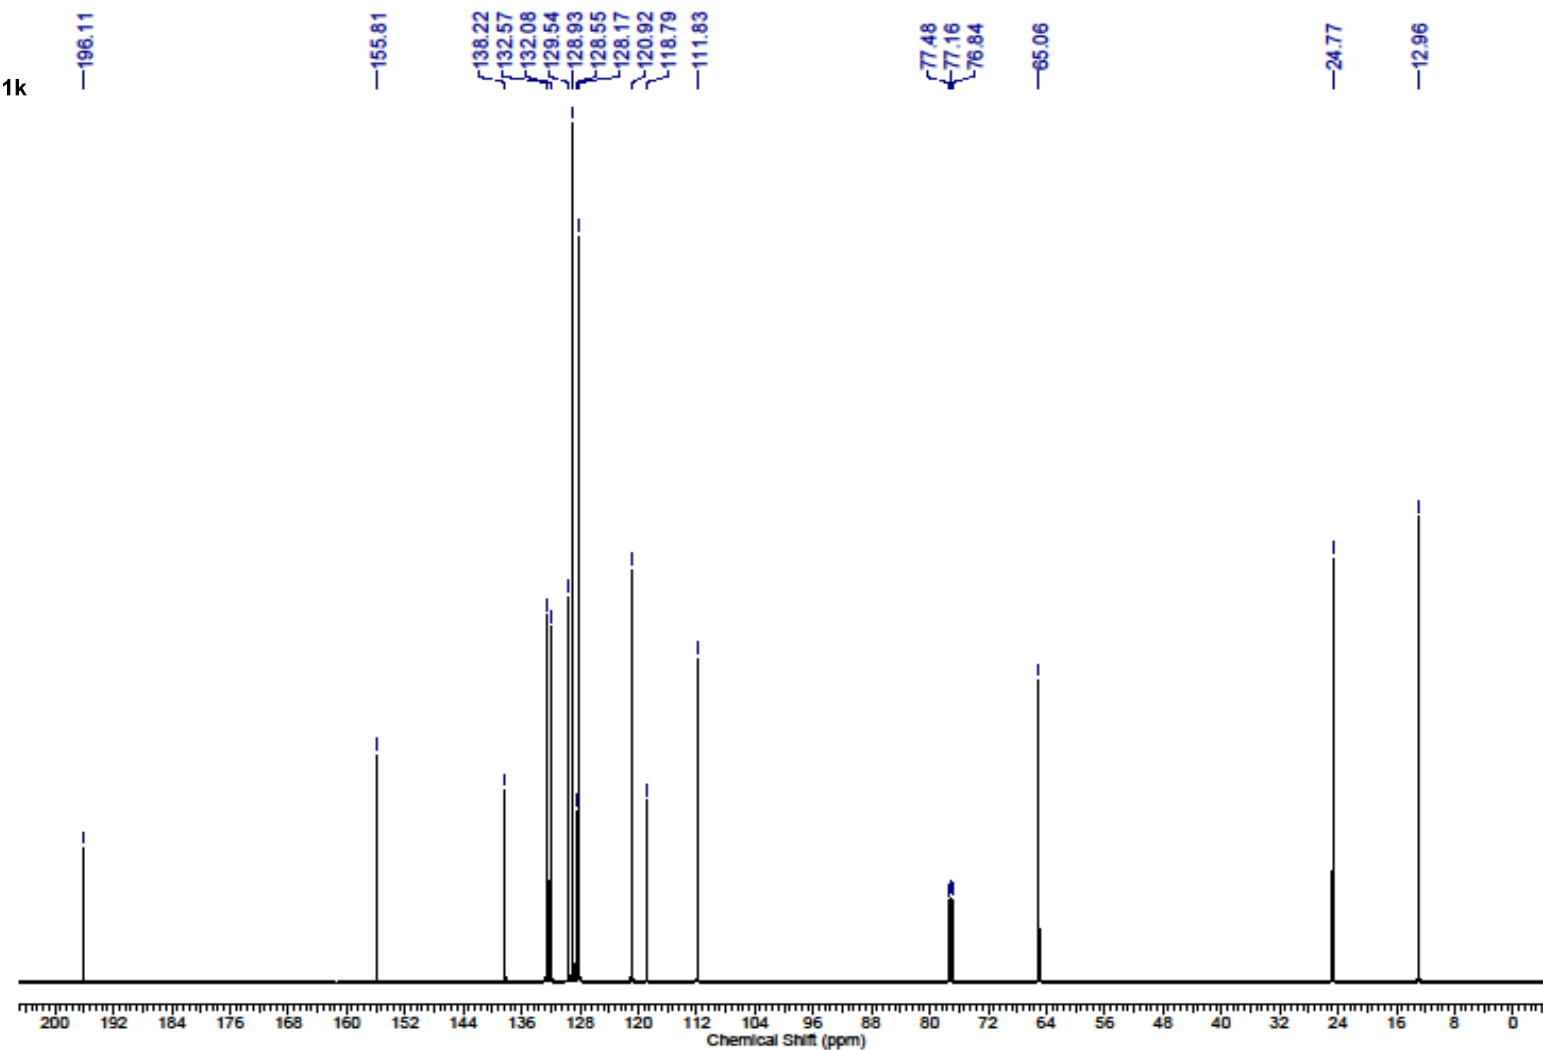

$^1\text{H}$  NMR spectrum of **11** in  $\text{CDCl}_3$  with 0.05% v/v TMS (400 MHz)

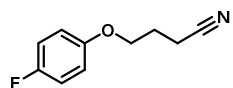

**11**

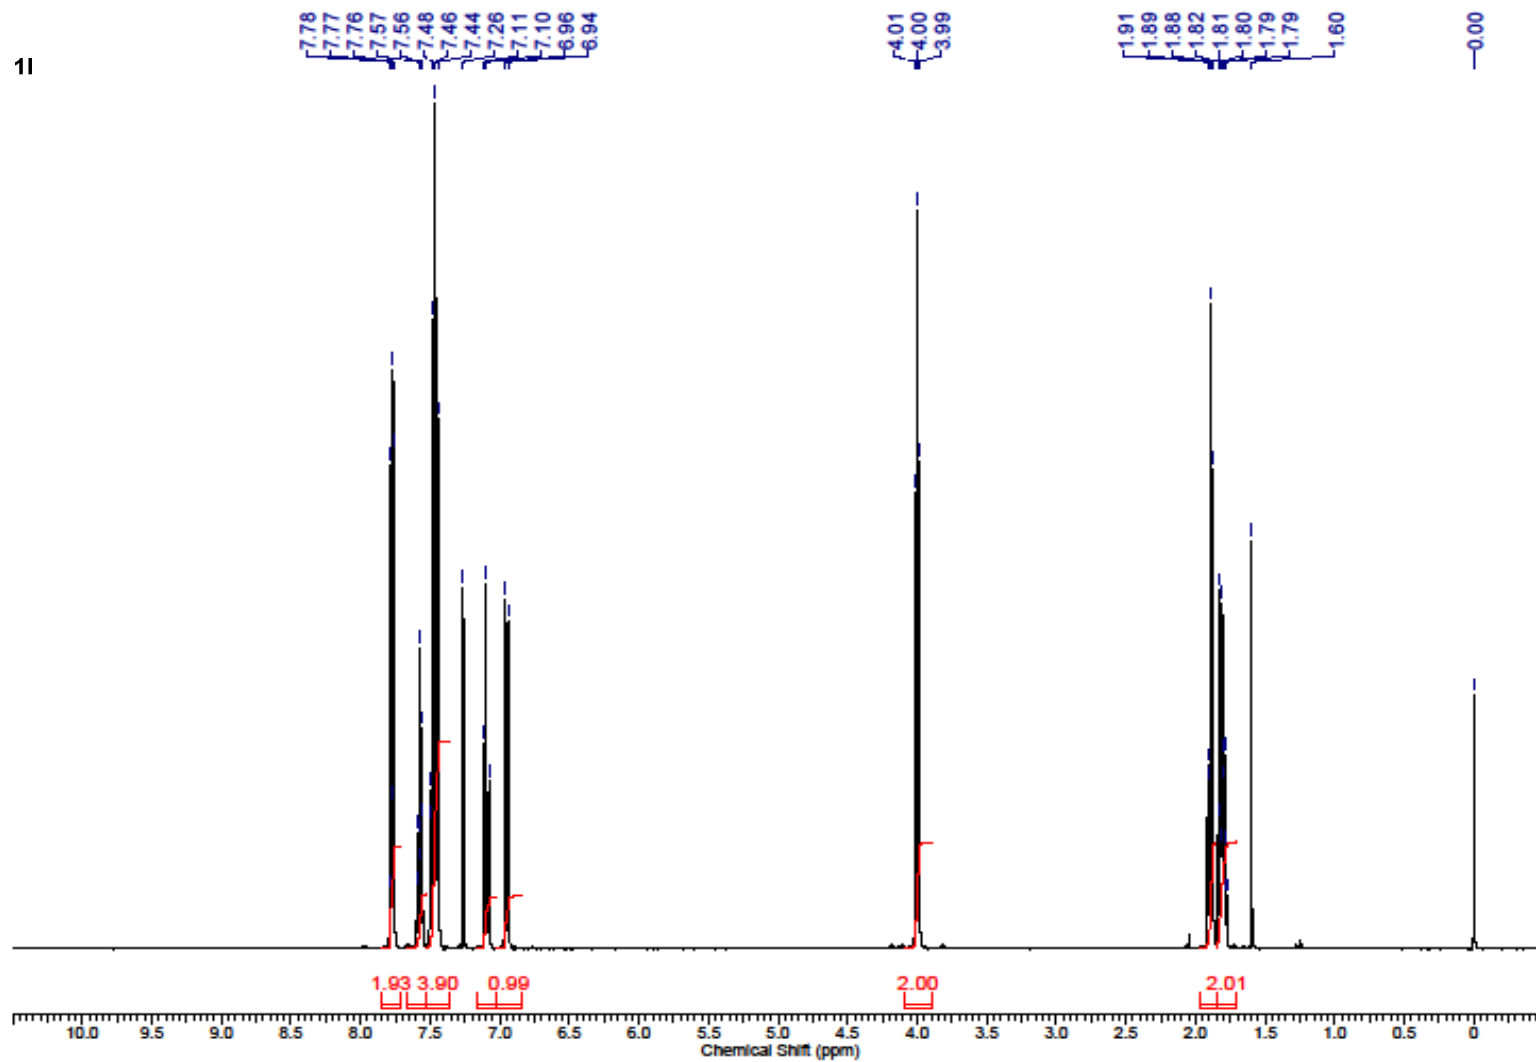

$^{13}\text{C}\{^1\text{H}\}$  NMR spectrum of **11** in  $\text{CDCl}_3$  with 0.05% v/v TMS (100 MHz)

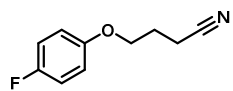

**11**

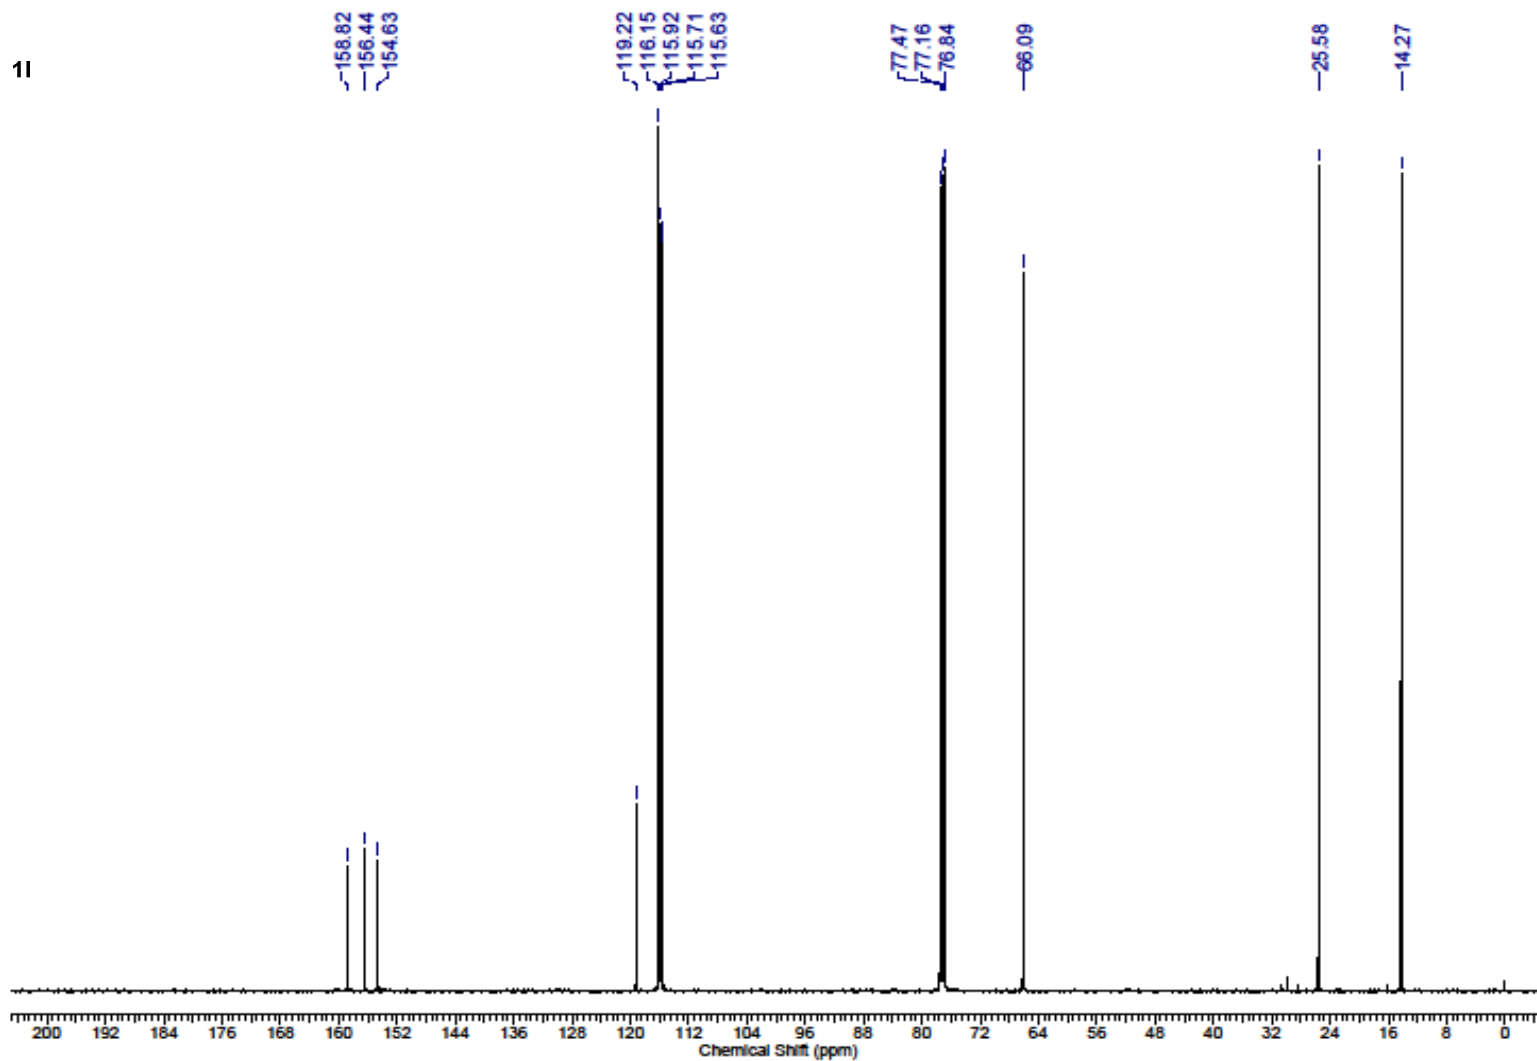

$^1\text{H}$  NMR spectrum of **1m** in  $\text{CDCl}_3$  with 0.05% v/v TMS (400 MHz)

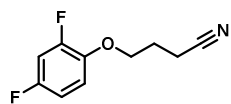

**1m**

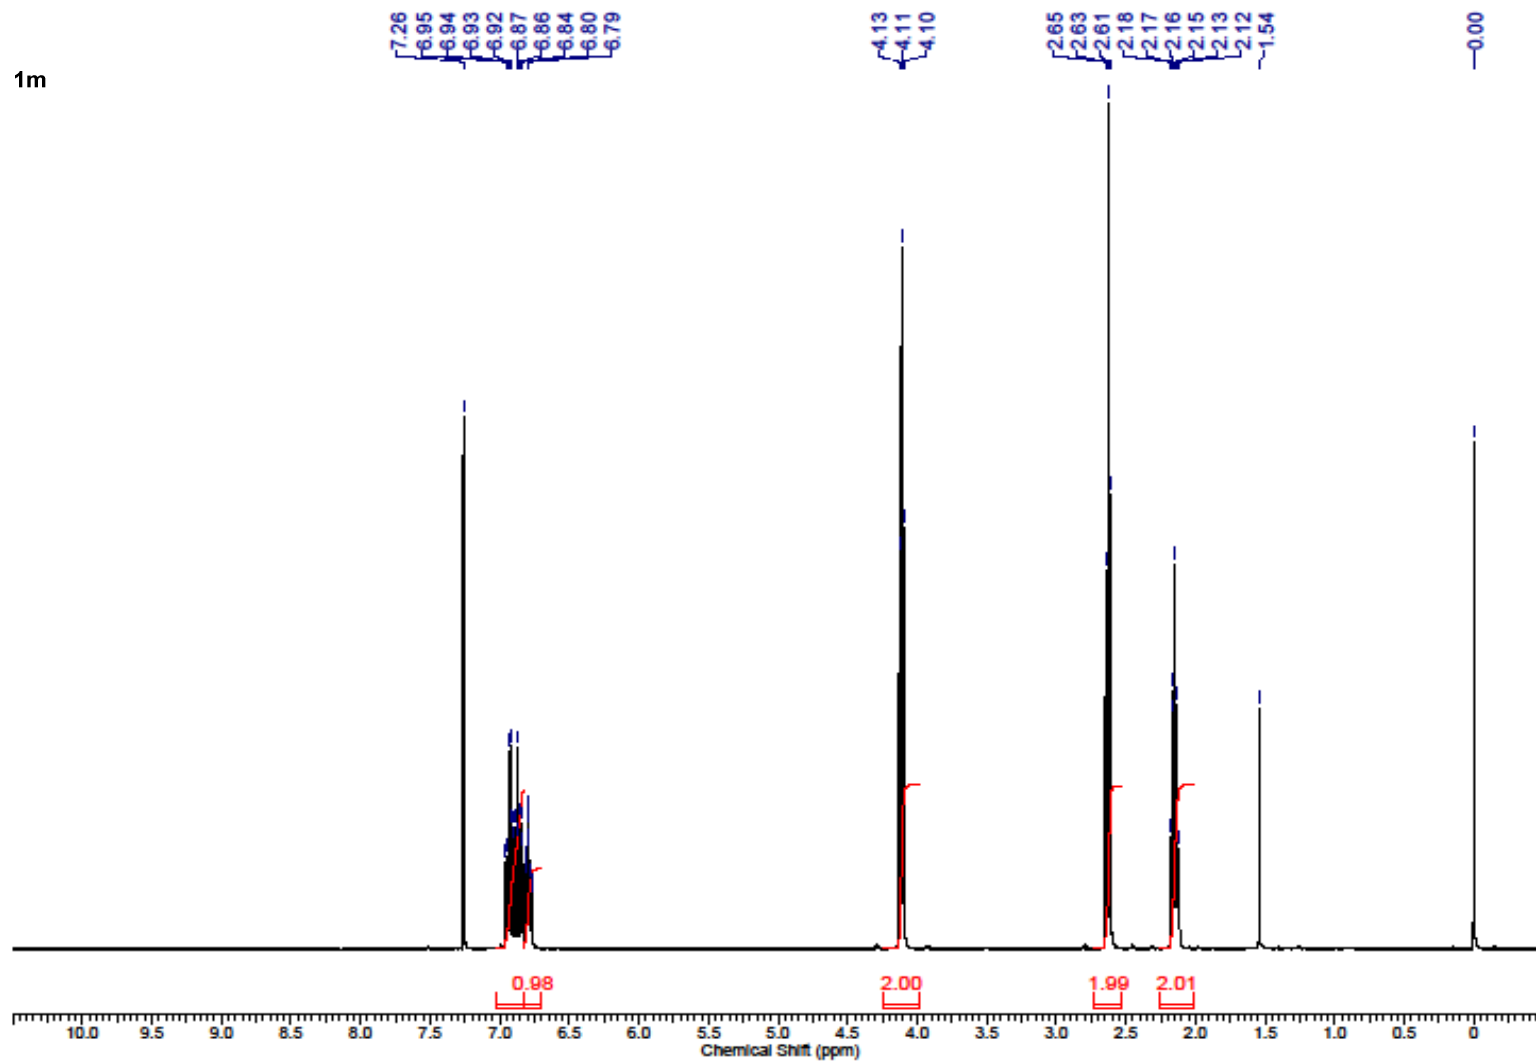

$^{13}\text{C}\{^1\text{H}\}$  NMR spectrum of **1m** in  $\text{CDCl}_3$  with 0.05% v/v TMS (100 MHz)



**1m**

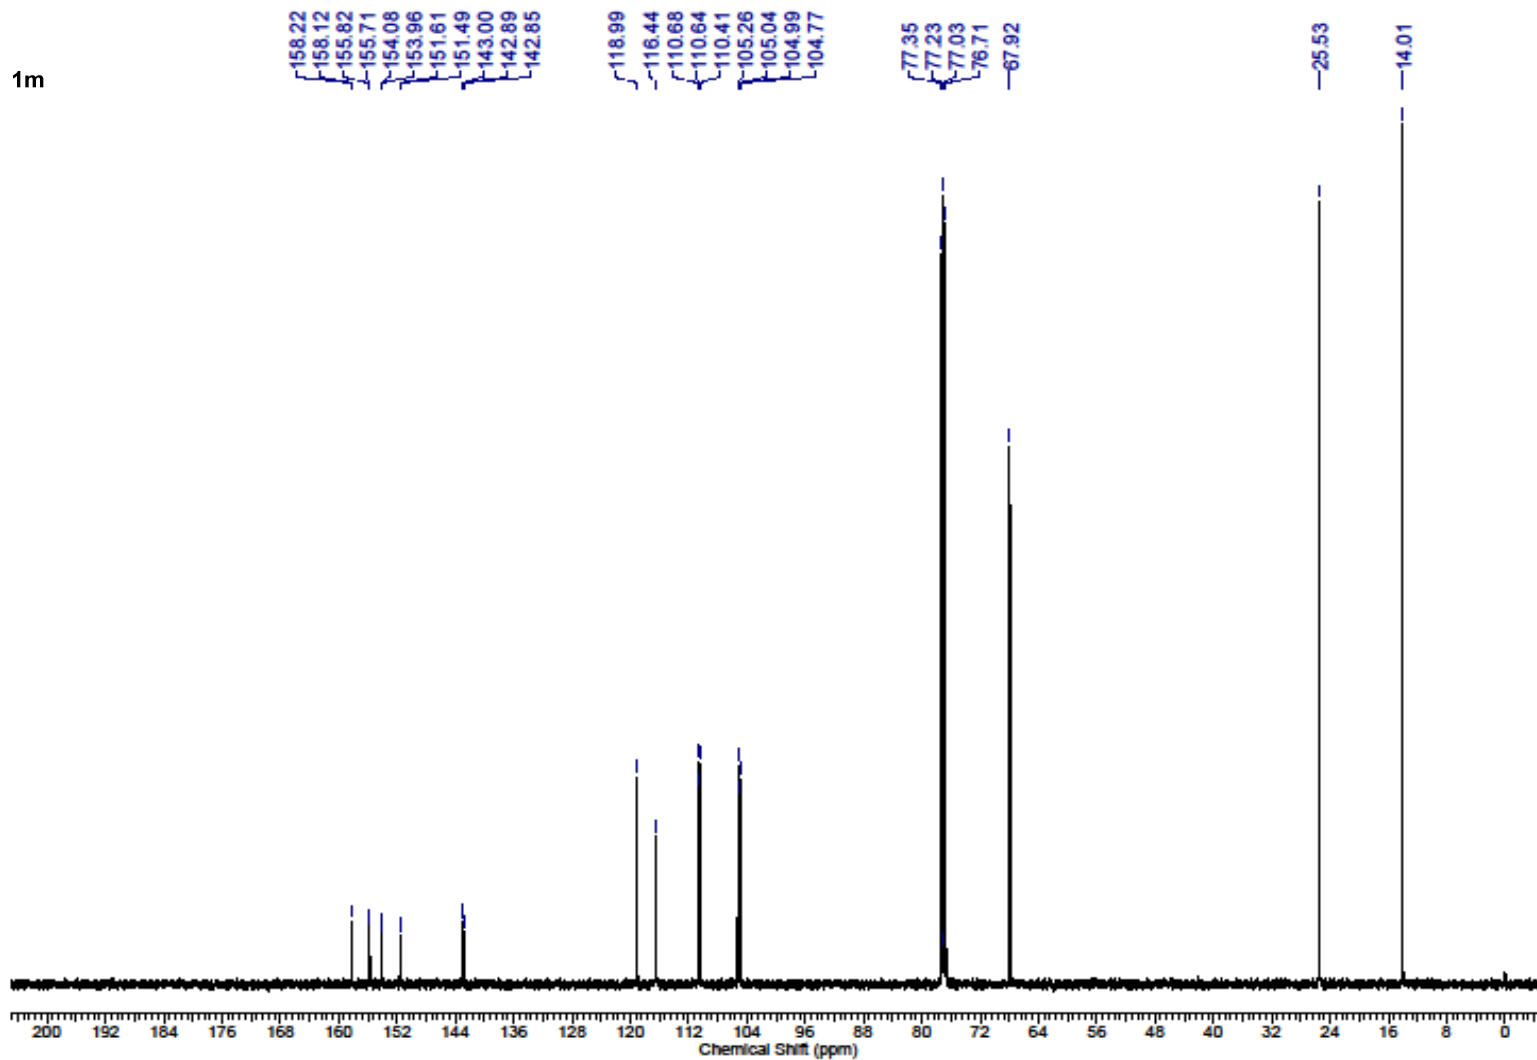



$^1\text{H}$  NMR spectrum of **1n** in  $\text{CDCl}_3$  with 0.05% v/v TMS (400 MHz)

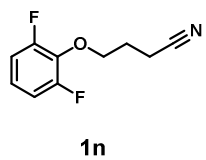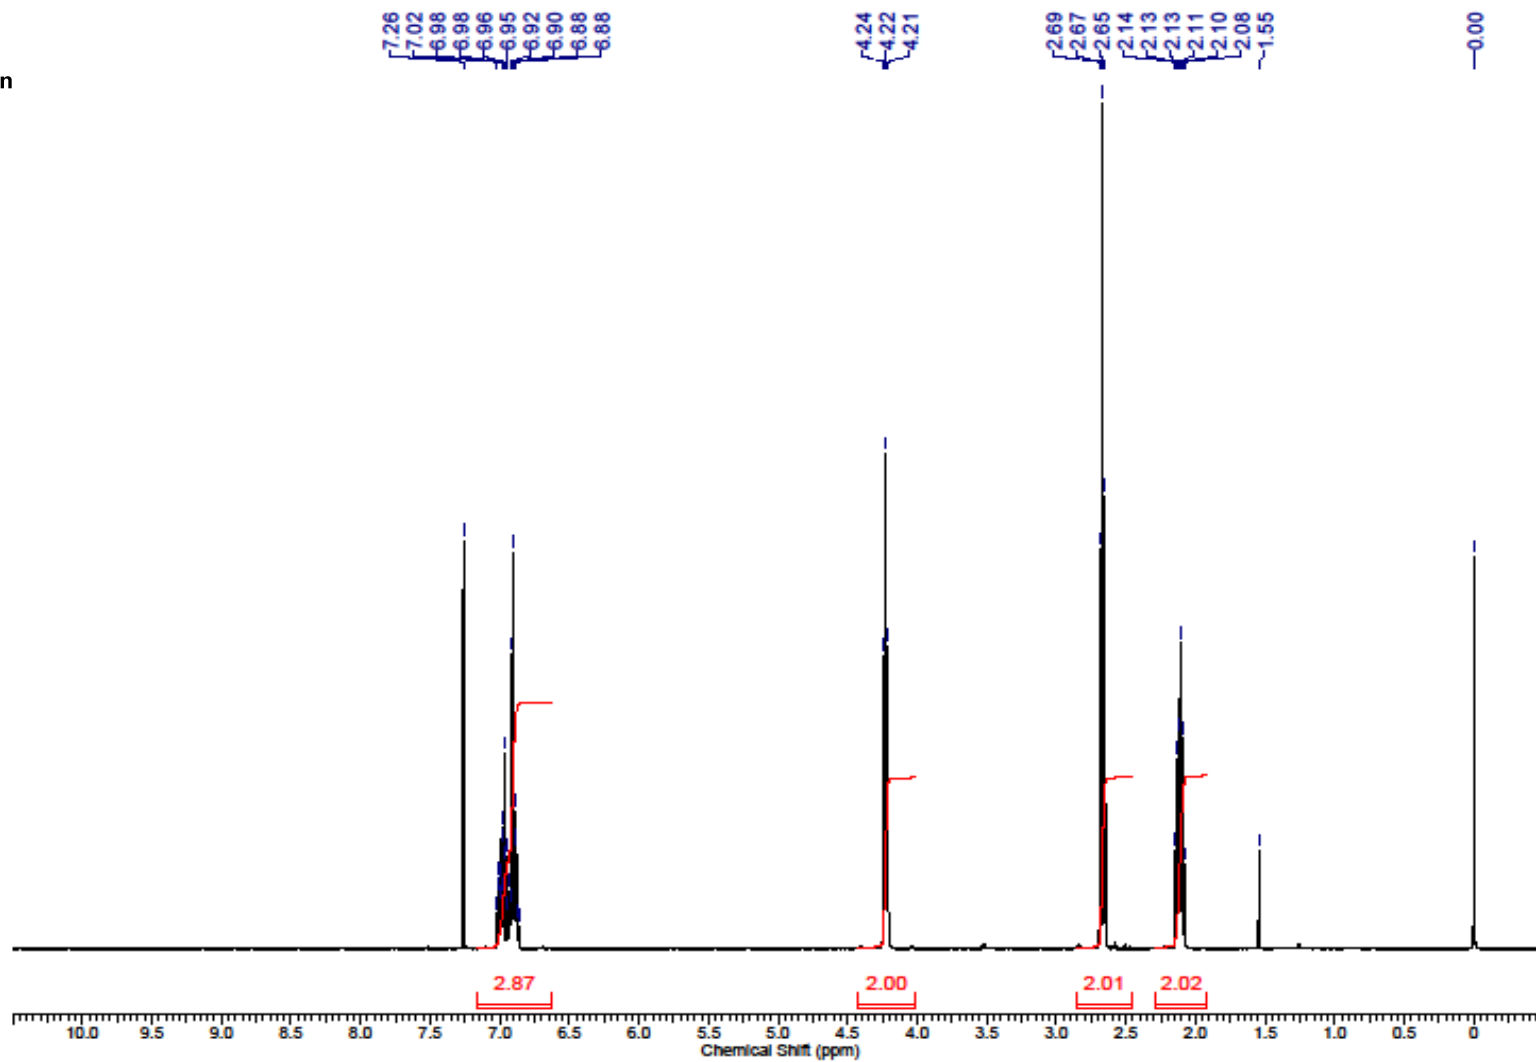

$^{13}\text{C}\{^1\text{H}\}$  NMR spectrum of **1n** in  $\text{CDCl}_3$  with 0.05% v/v TMS (100 MHz)

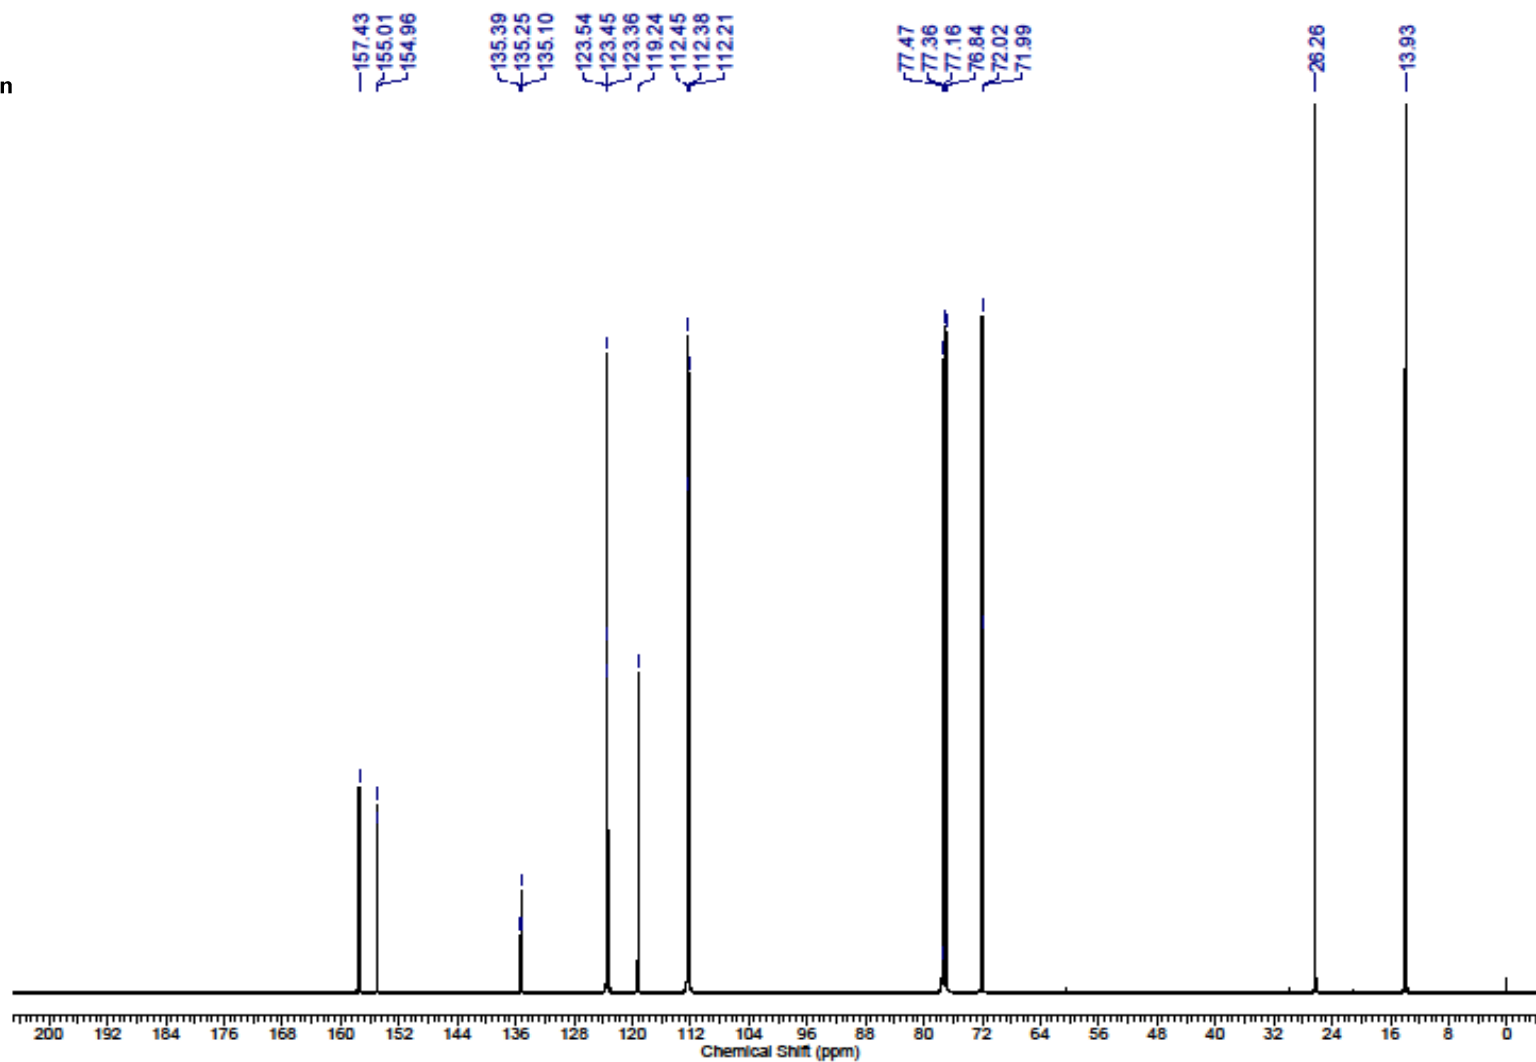

$^1\text{H}$  NMR spectrum of **1o** in  $\text{CDCl}_3$  with 0.05% v/v TMS (400 MHz)

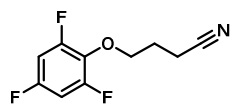

**1o**

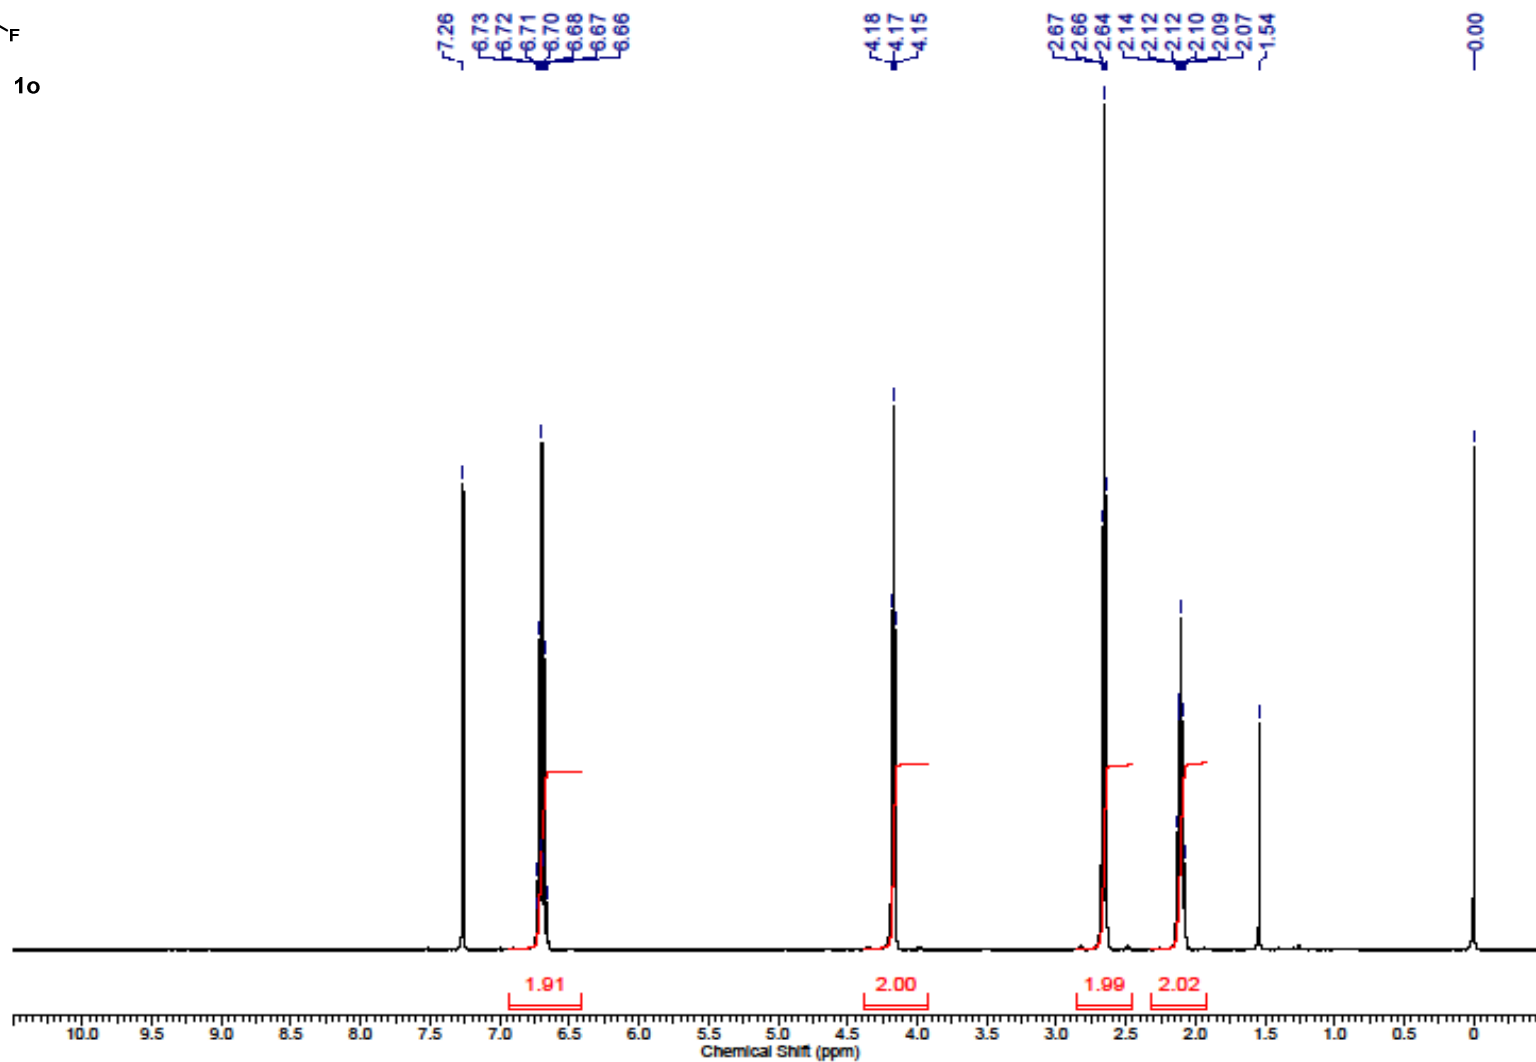

$^{13}\text{C}\{^1\text{H}\}$  NMR spectrum of **1o** in  $\text{CDCl}_3$  with 0.05% v/v TMS (100 MHz)

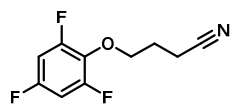

**1o**

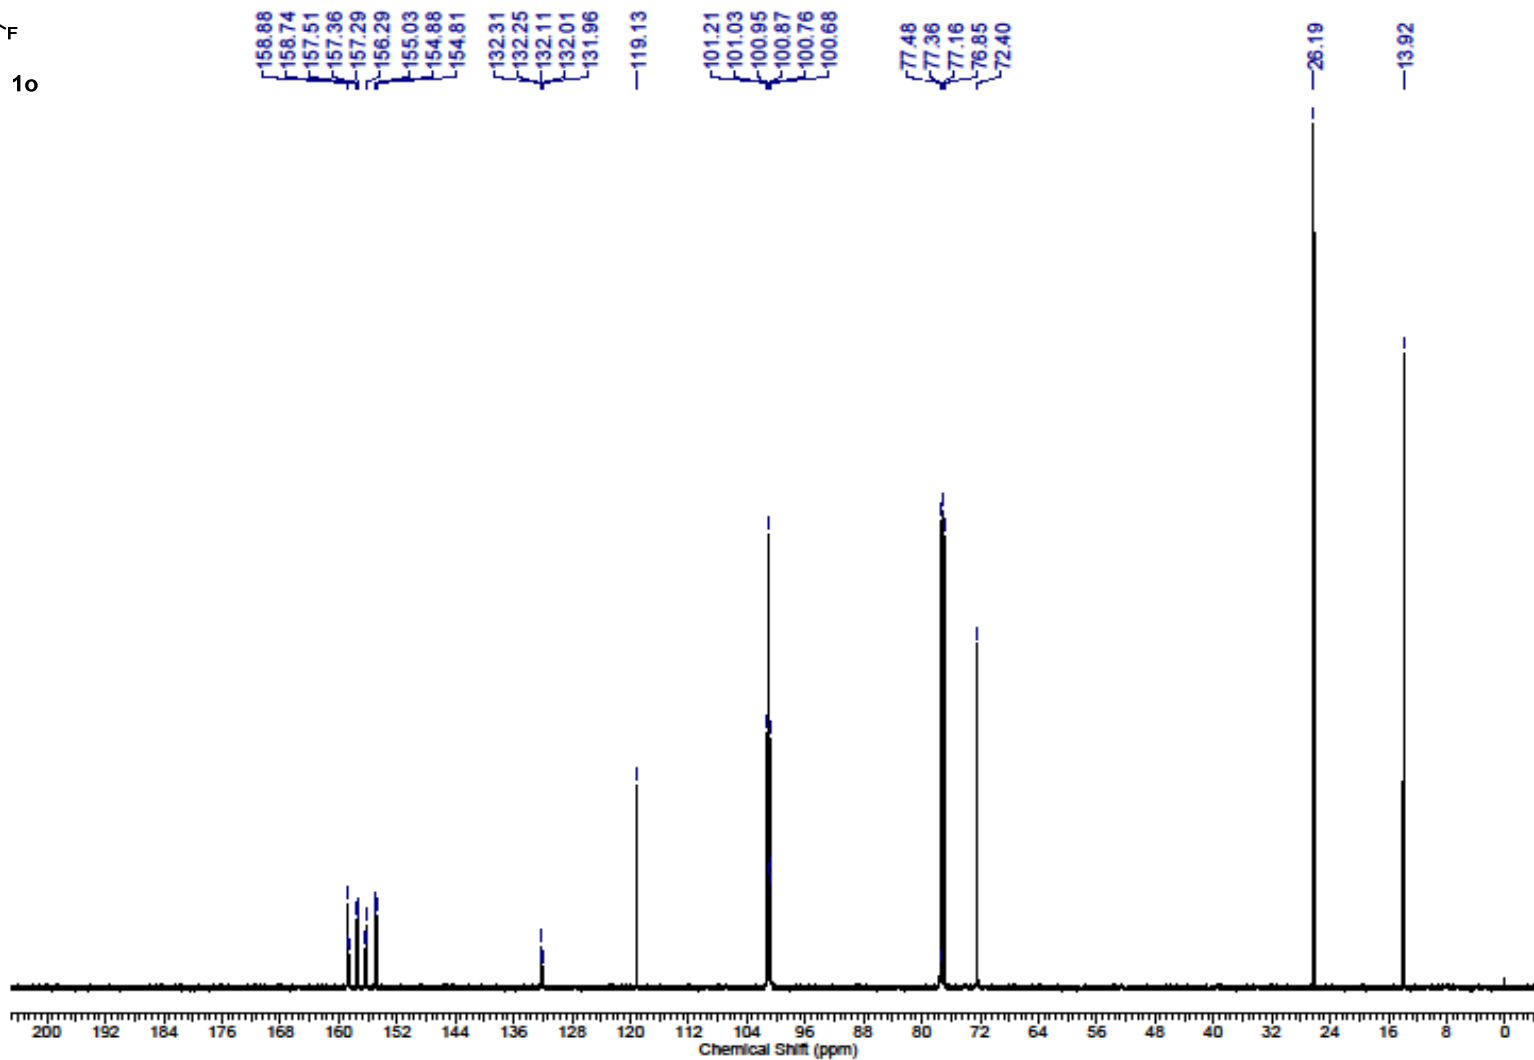

$^1\text{H}$  NMR spectrum of **1p** in  $\text{CDCl}_3$  with 0.05% v/v TMS (400 MHz)

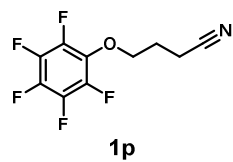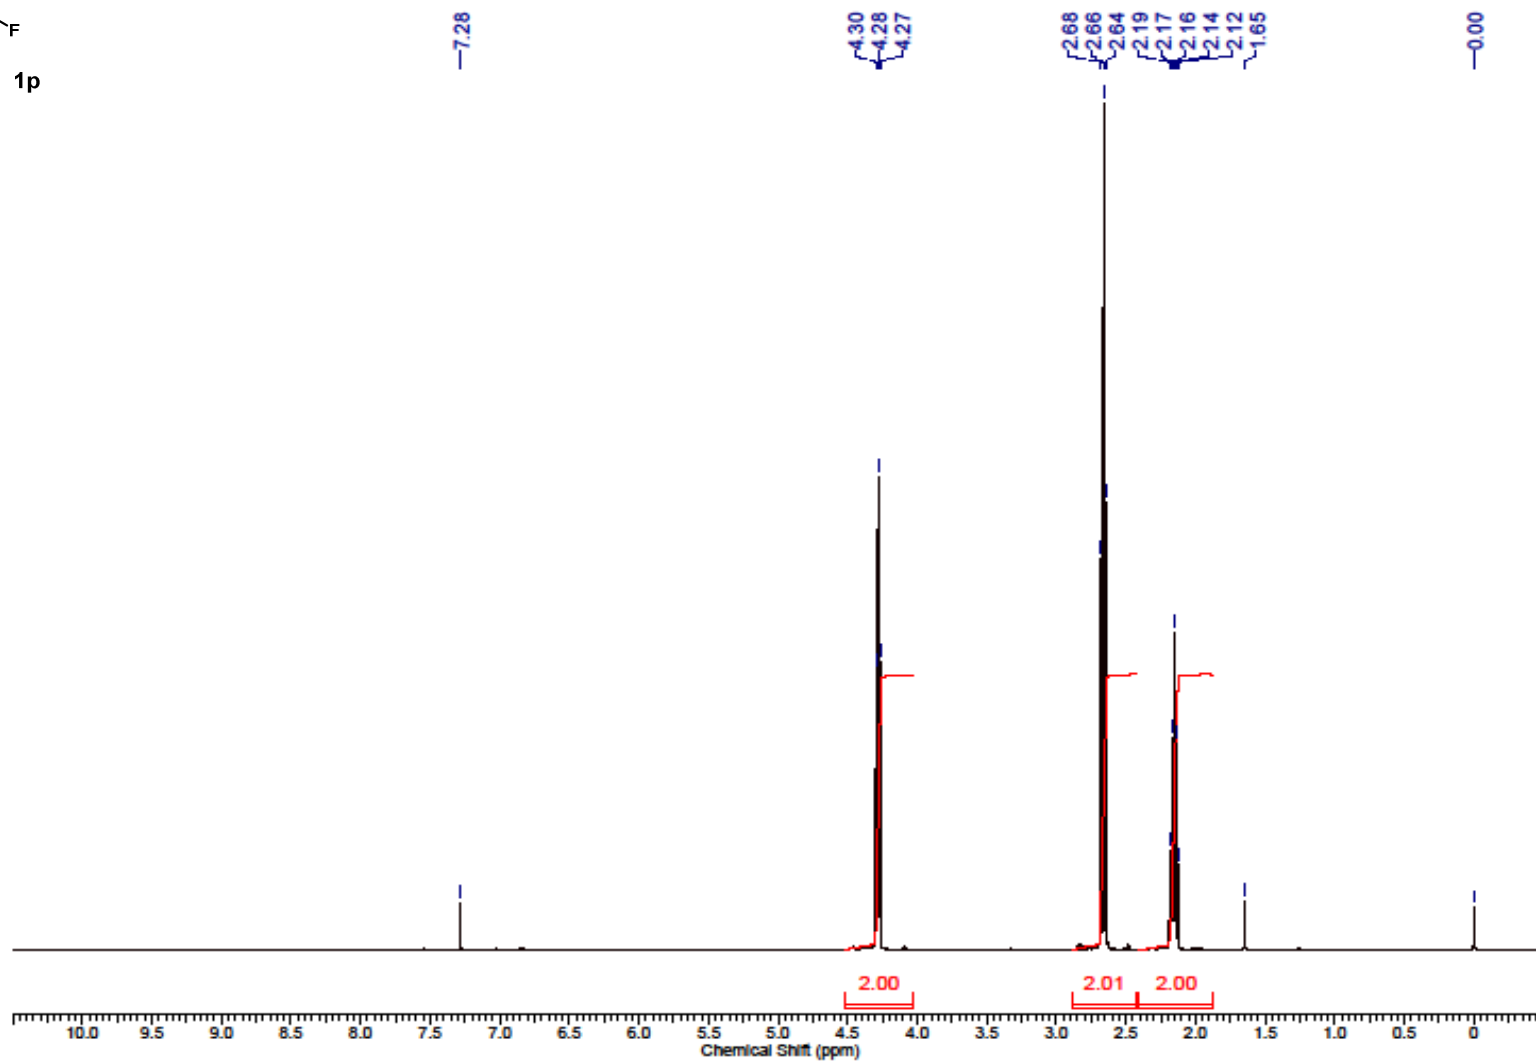

$^{13}\text{C}\{^1\text{H}\}$  NMR spectrum of **1p** in  $\text{CDCl}_3$  with 0.05% v/v TMS (100 MHz)

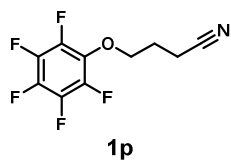

143.19  
143.15  
143.03  
140.72  
140.68  
140.56  
139.29  
136.87  
136.51  
133.27  
118.77

77.48  
77.16  
76.84  
73.06

26.11

13.85

-0.05

$^{13}\text{C}\{^{19}\text{F}\}$  NMR spectrum of **1p** in  $\text{CDCl}_3$  with 0.05% v/v TMS (125 MHz)

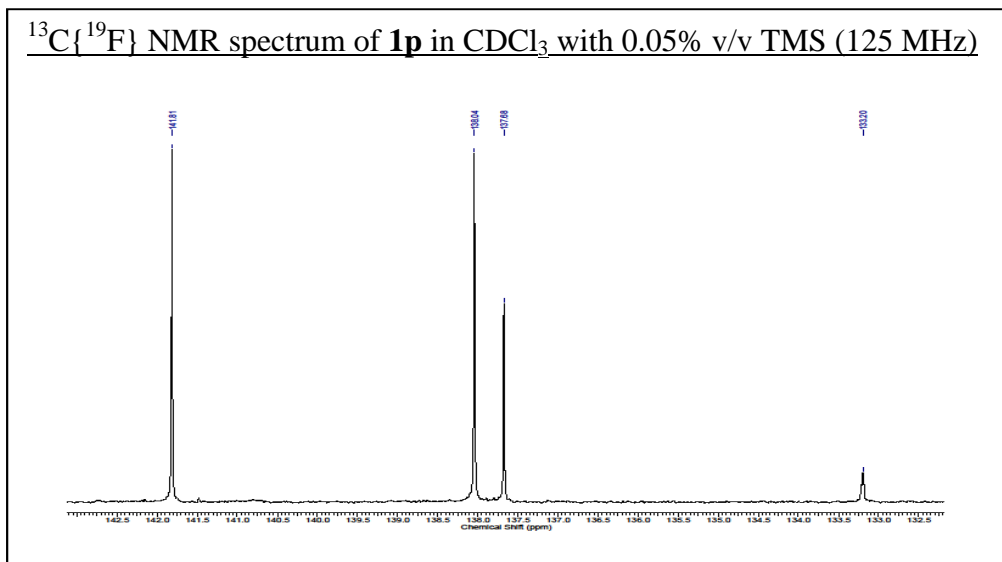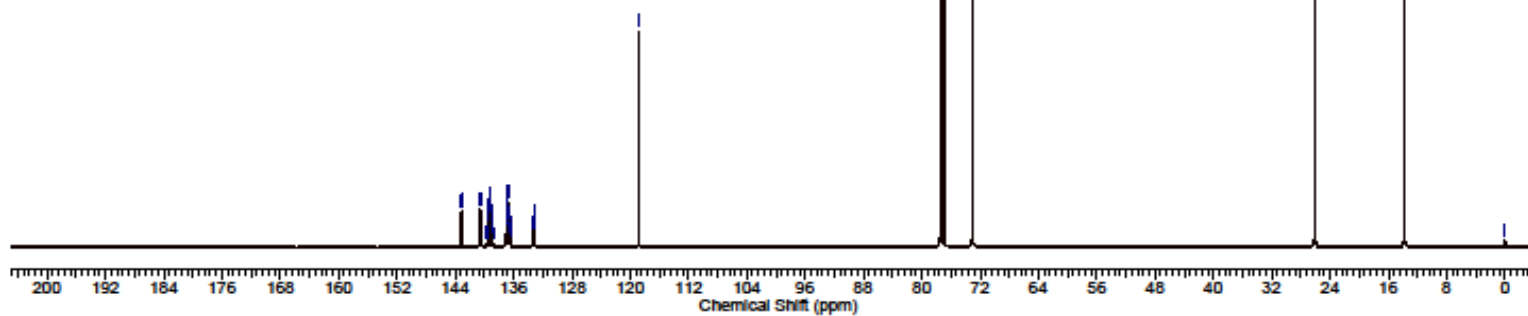

$^1\text{H}$  NMR spectrum of **1q** in  $\text{CDCl}_3$  with 0.05% v/v TMS (400 MHz)

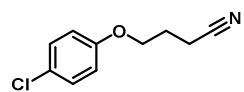

**1q**

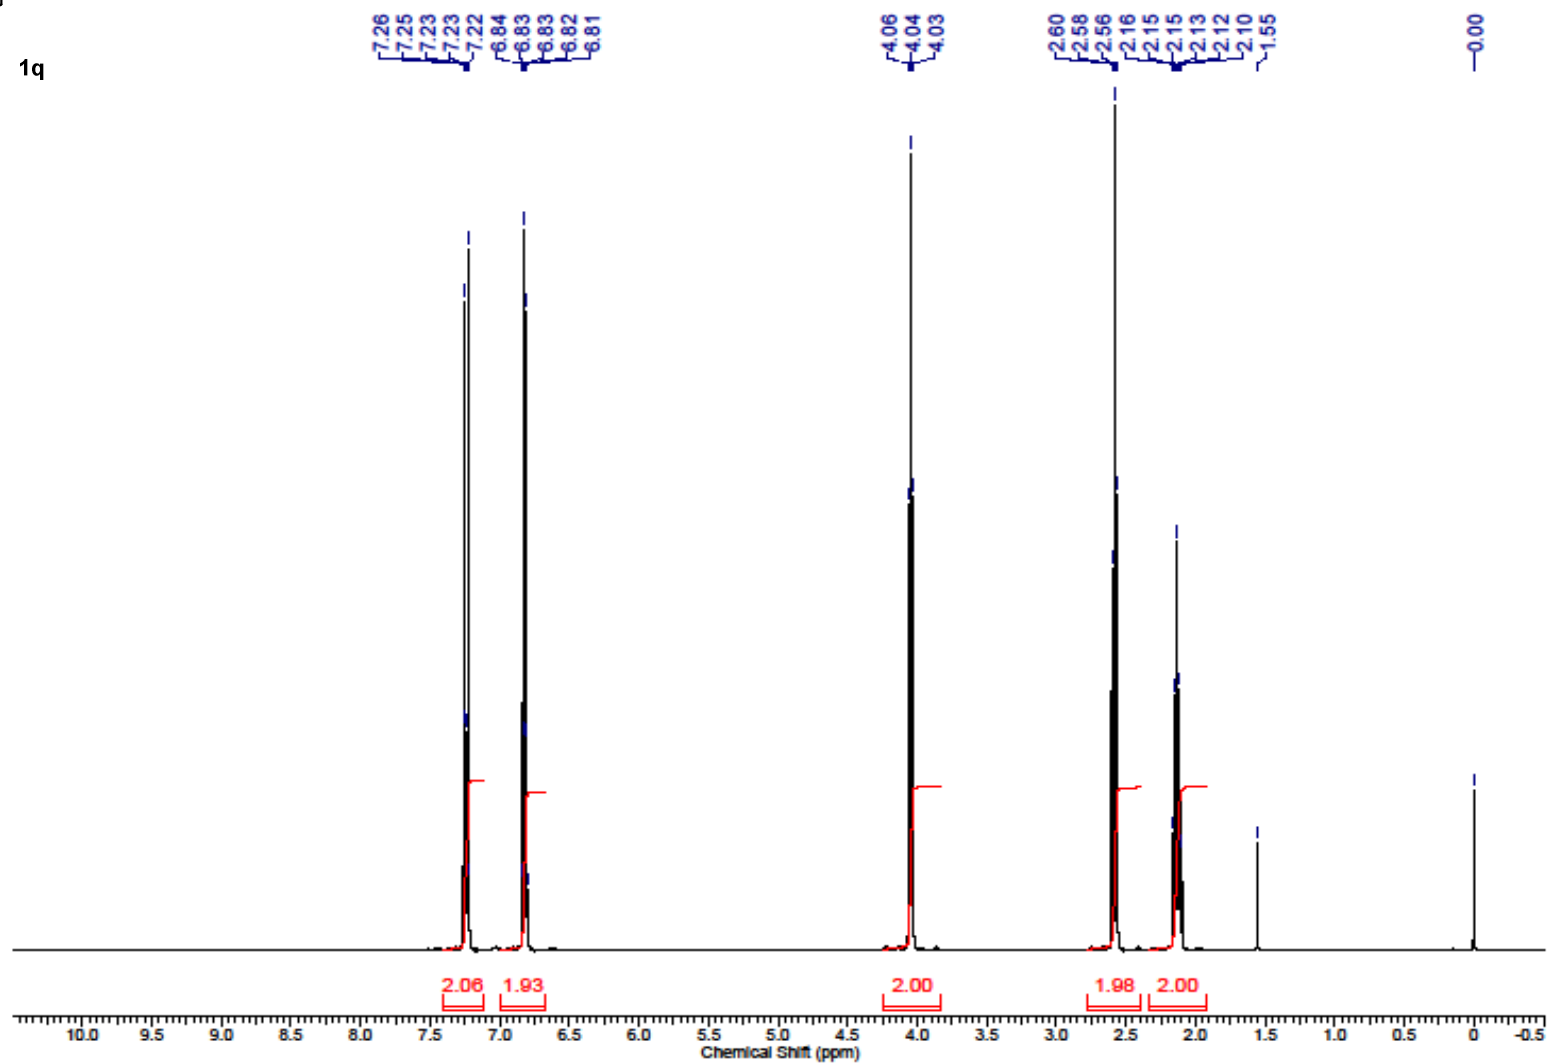

$^{13}\text{C}\{^1\text{H}\}$  NMR spectrum of **1q** in  $\text{CDCl}_3$  with 0.05% v/v TMS (100 MHz)

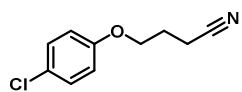

**1q**

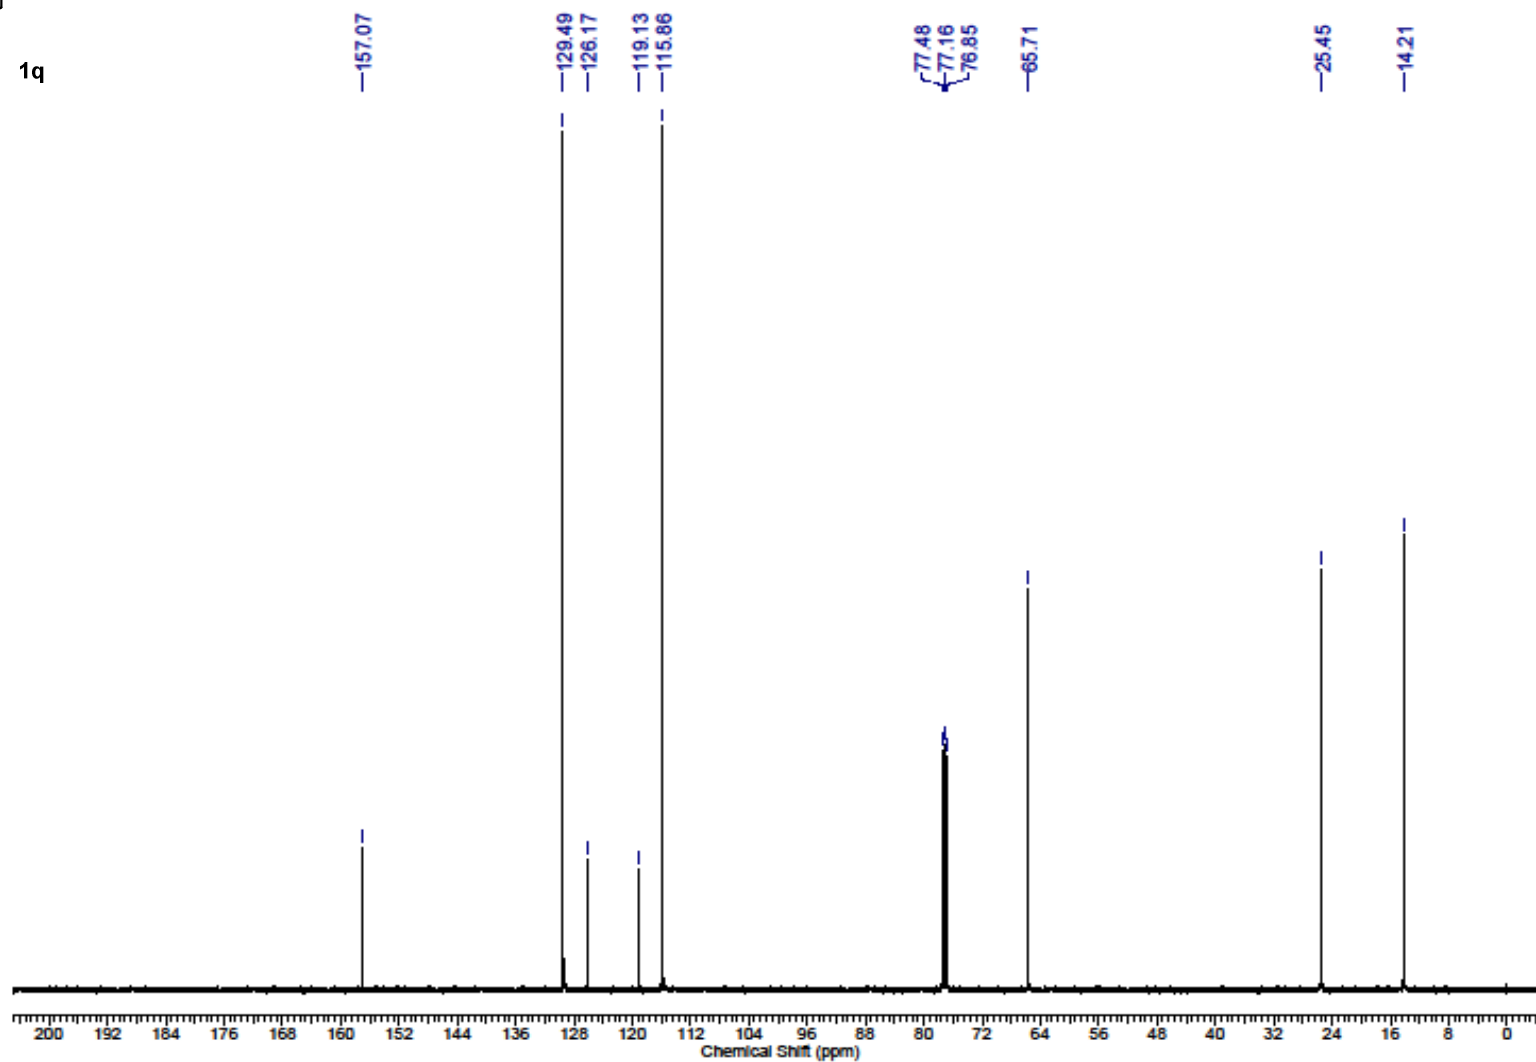



$^1\text{H}$  NMR spectrum of **1r** in  $\text{CDCl}_3$  with 0.05% v/v TMS (400 MHz)

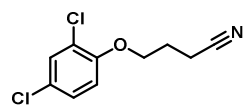

**1r**

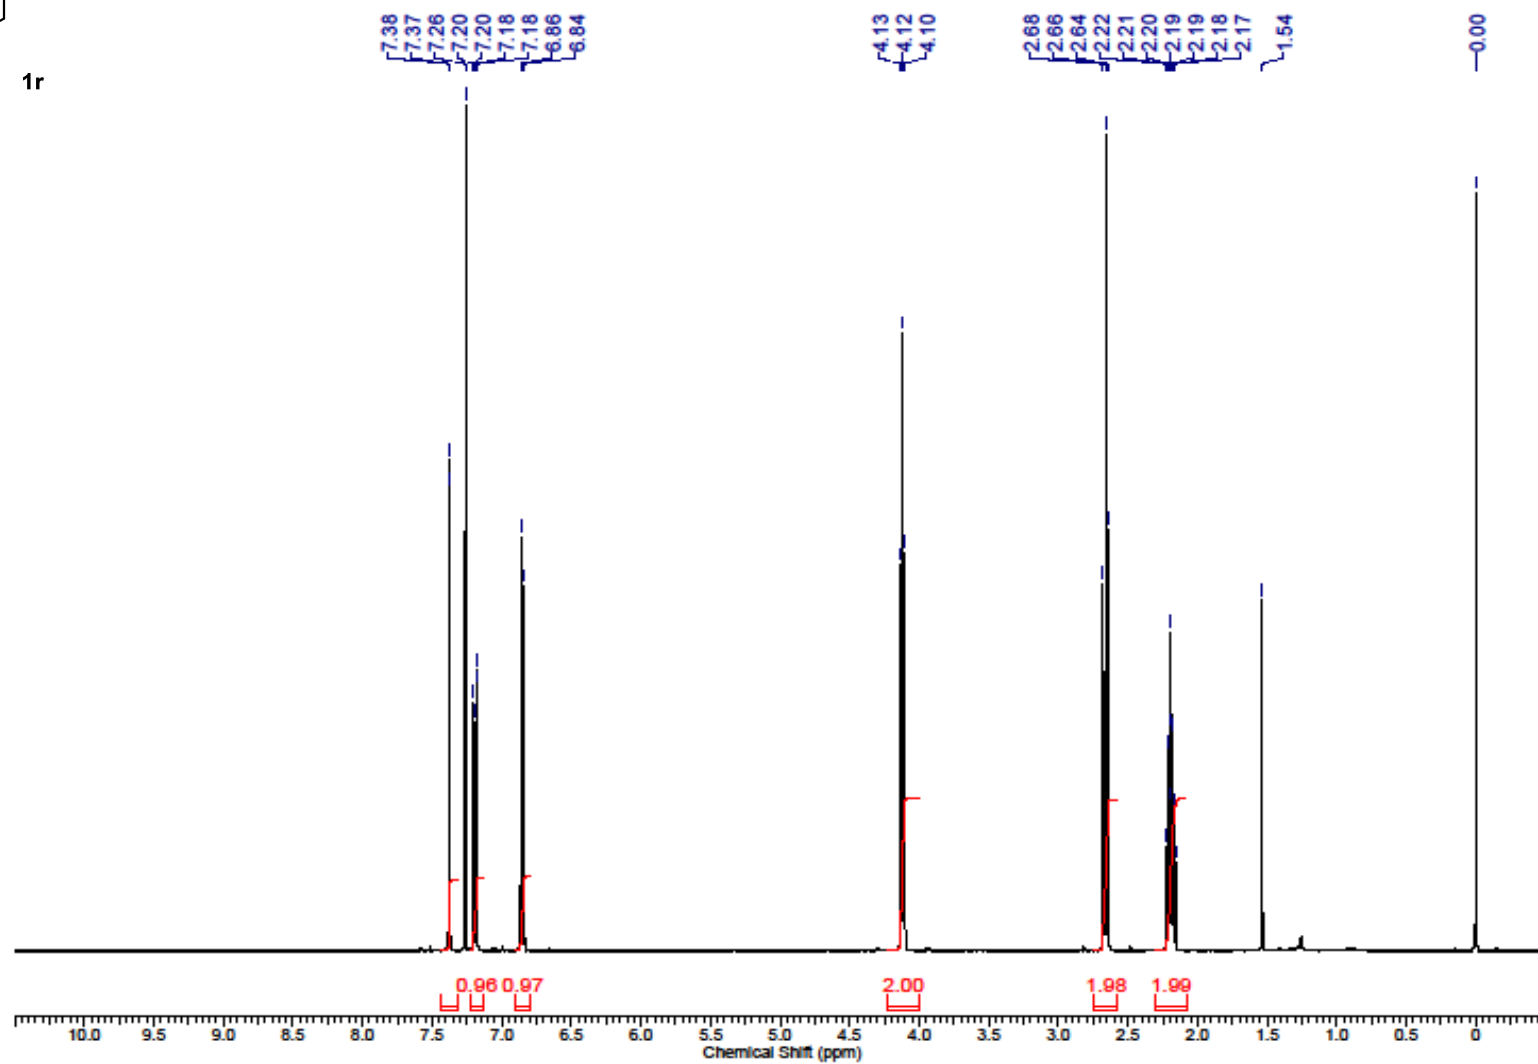

$^{13}\text{C}\{^1\text{H}\}$  NMR spectrum of **1r** in  $\text{CDCl}_3$  with 0.05% v/v TMS (100 MHz)

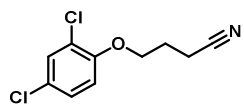

**1r**

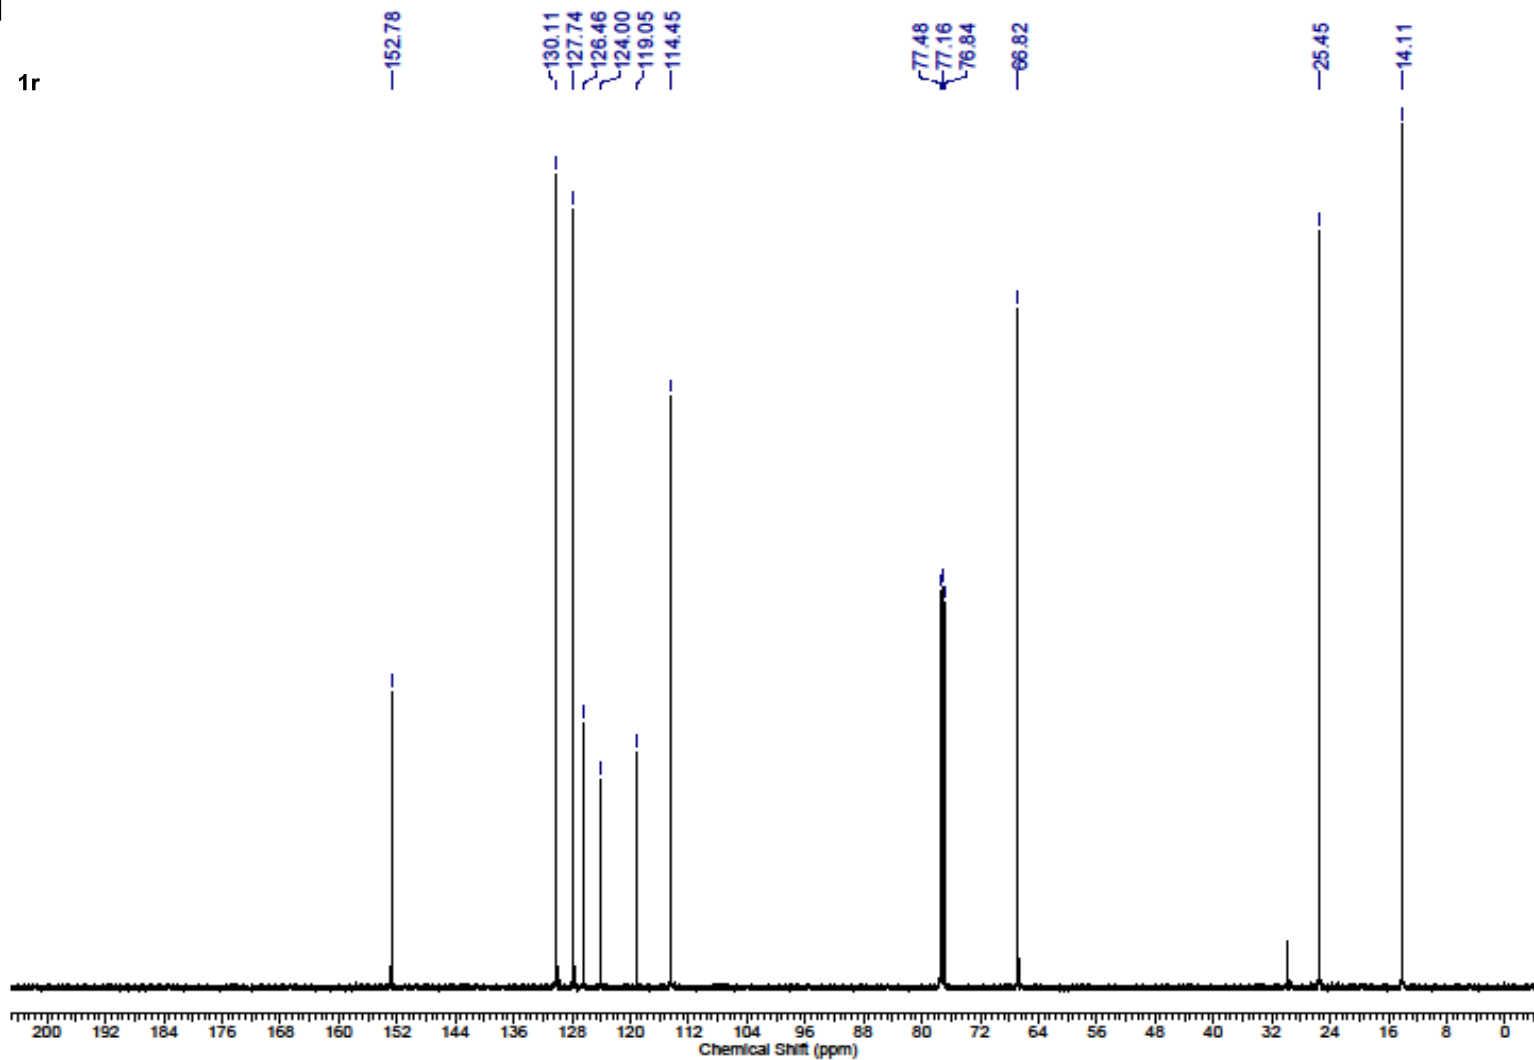

$^1\text{H}$  NMR spectrum of **1s** in  $\text{CDCl}_3$  with 0.05% v/v TMS (400 MHz)

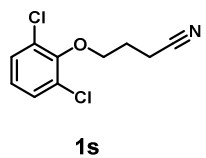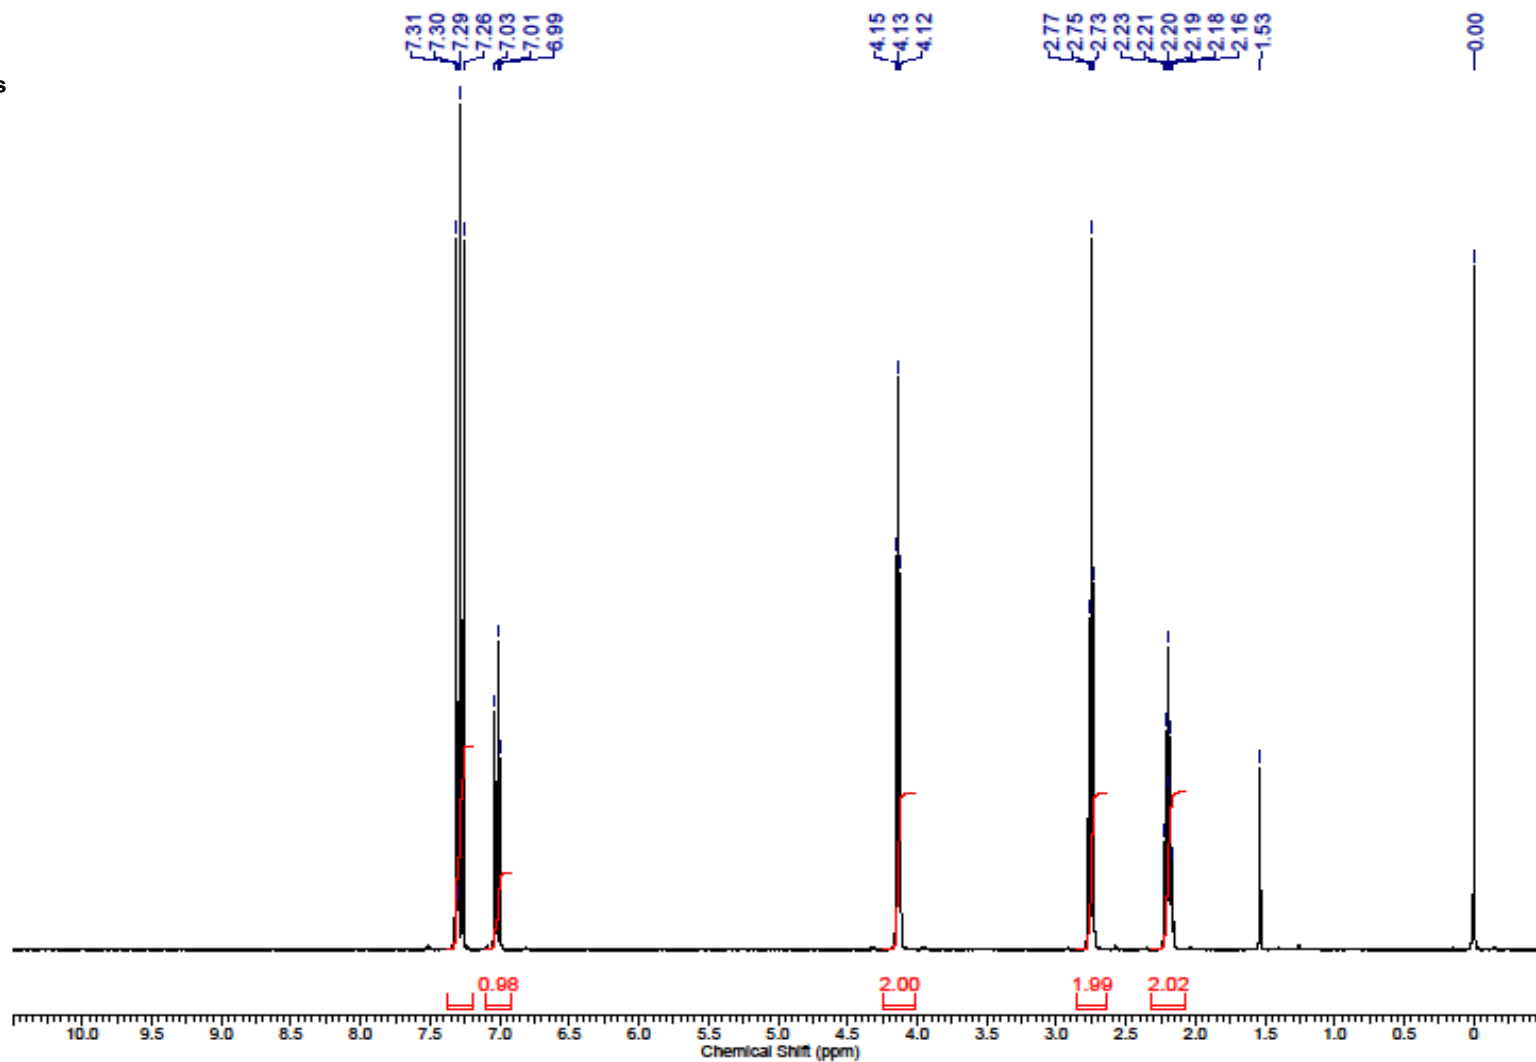

$^{13}\text{C}\{^1\text{H}\}$  NMR spectrum of **1s** in  $\text{CDCl}_3$  with 0.05% v/v TMS (100 MHz)

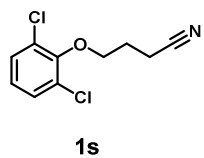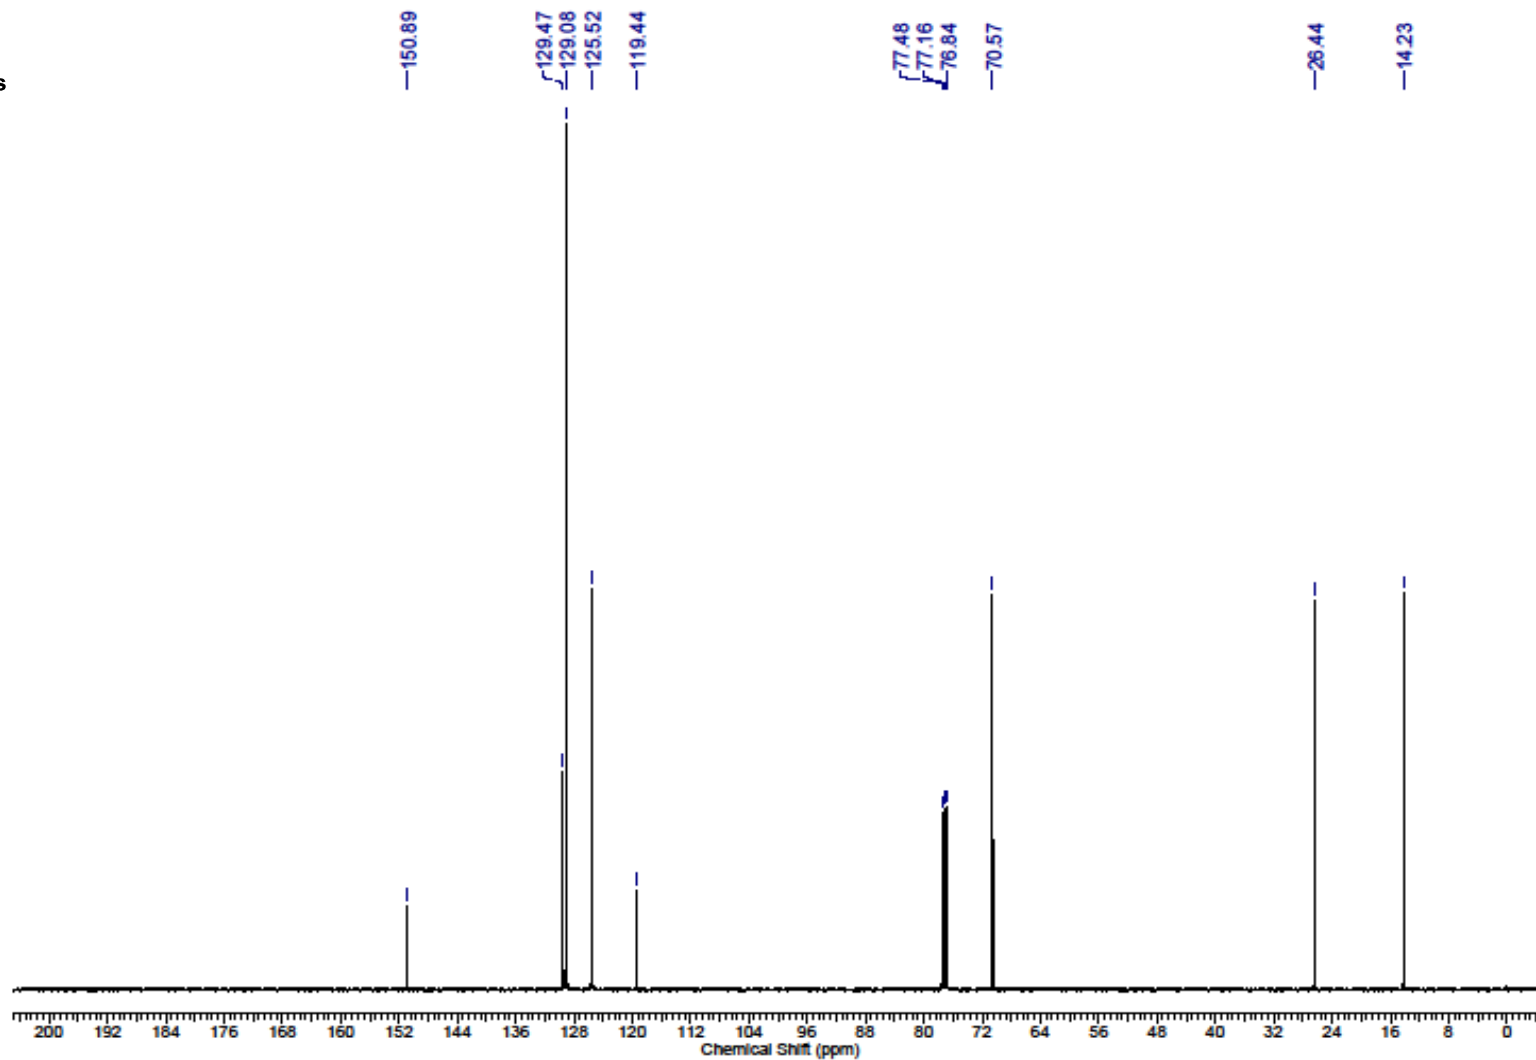

$^1\text{H}$  NMR spectrum of **1t** in  $\text{CDCl}_3$  with 0.05% v/v TMS (400 MHz)

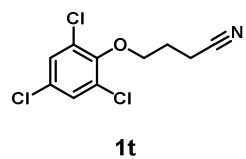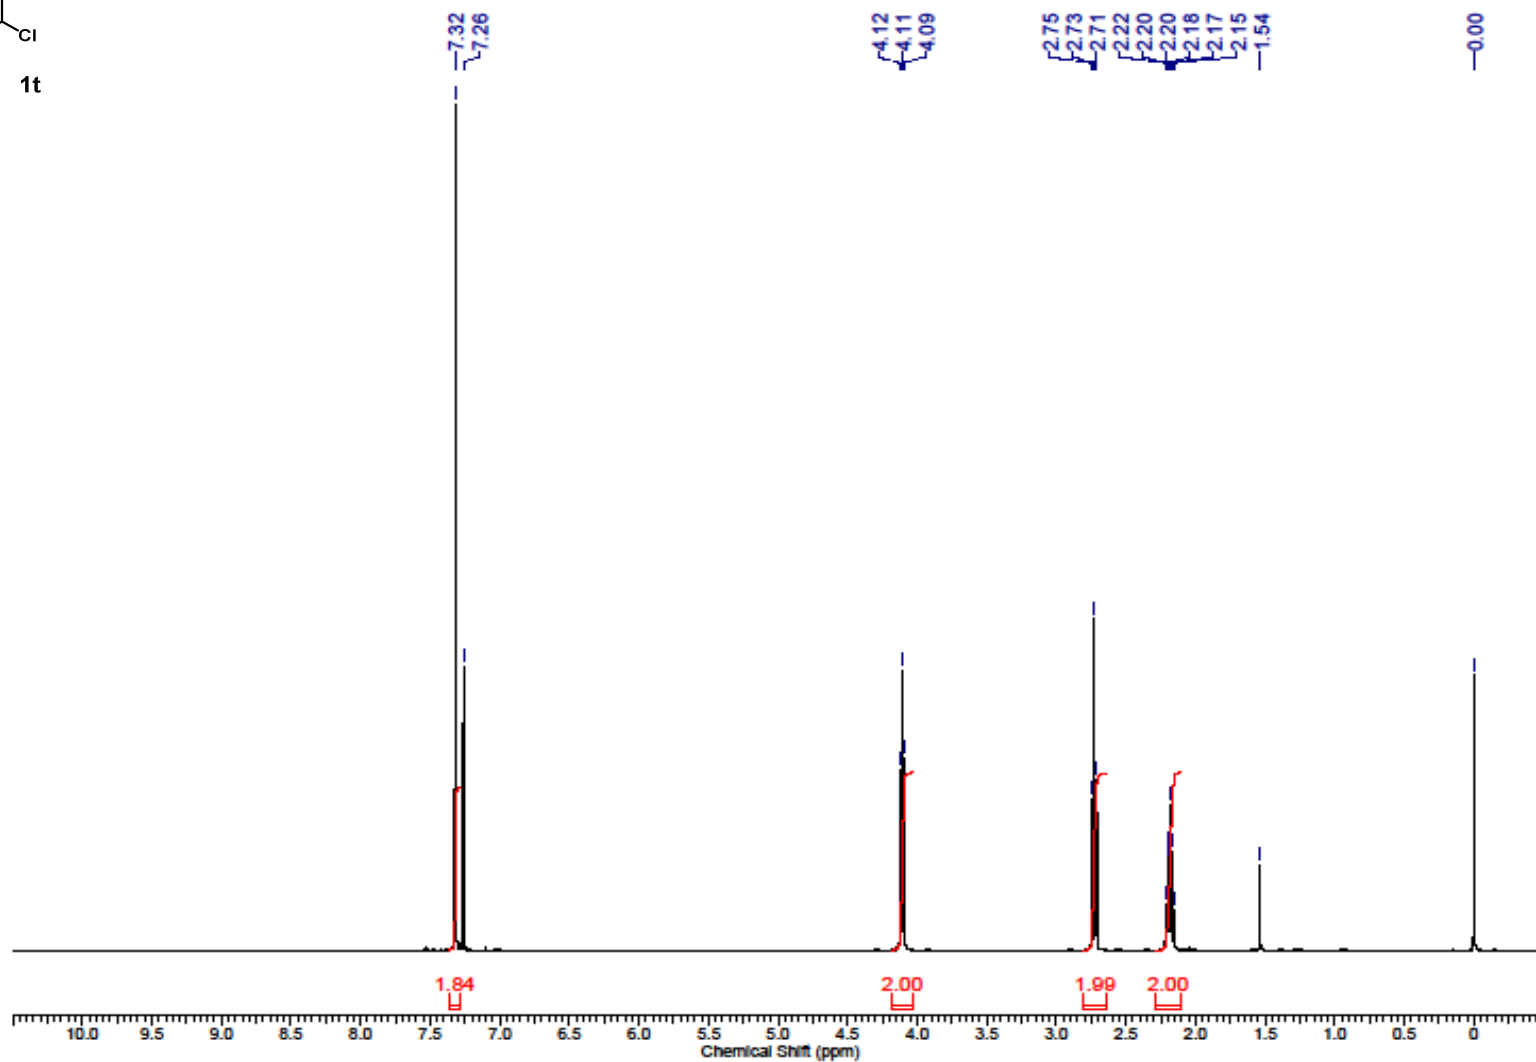

$^{13}\text{C}\{^1\text{H}\}$  NMR spectrum of **1t** in  $\text{CDCl}_3$  with 0.05% v/v TMS (100 MHz)

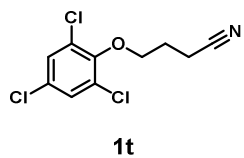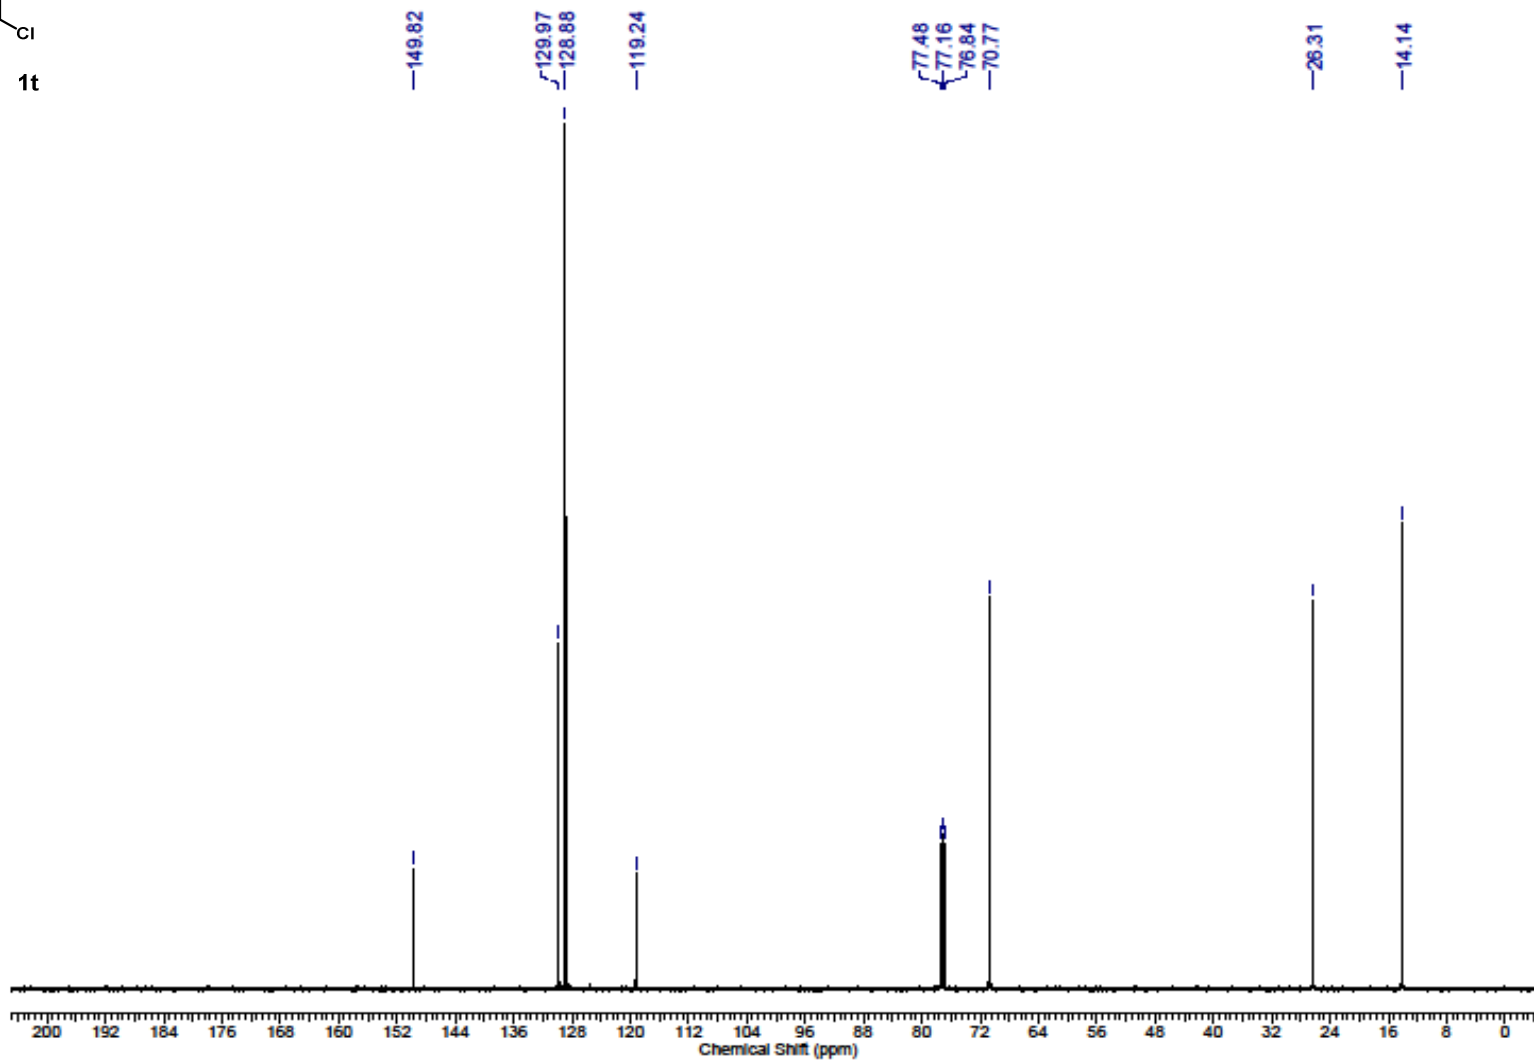

$^1\text{H}$  NMR spectrum of **1u** in  $\text{CDCl}_3$  with 0.05% v/v TMS (400 MHz)

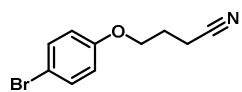

**1u**

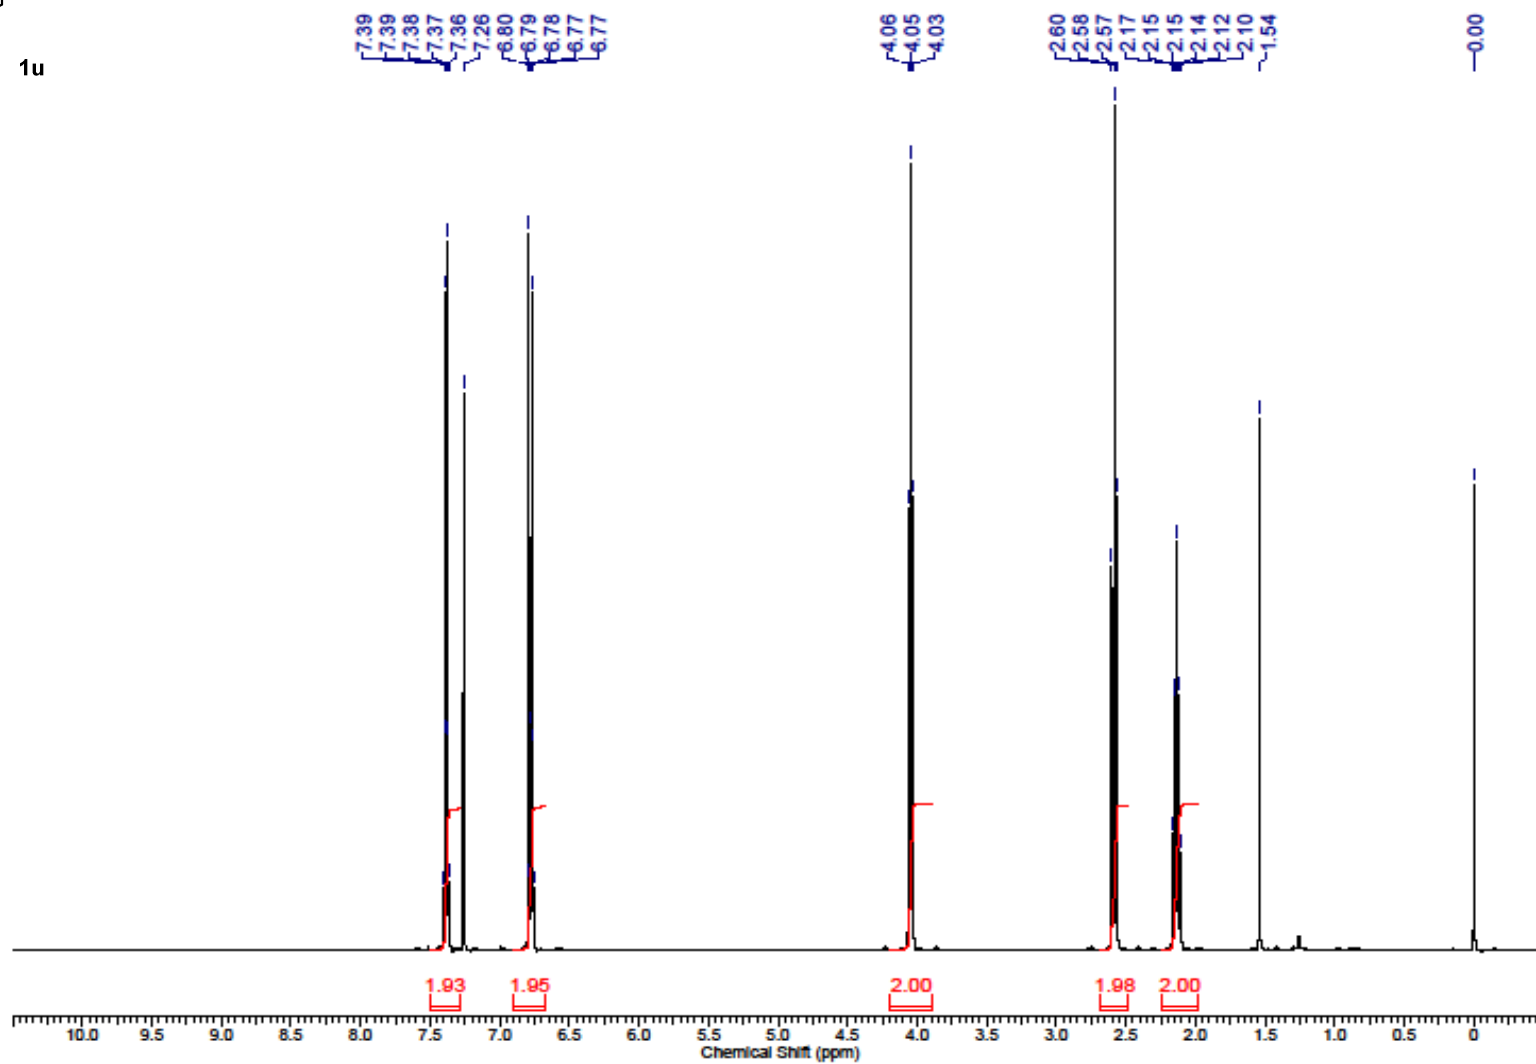

$^{13}\text{C}\{^1\text{H}\}$  NMR spectrum of **1u** in  $\text{CDCl}_3$  with 0.05% v/v TMS (100 MHz)



**1u**

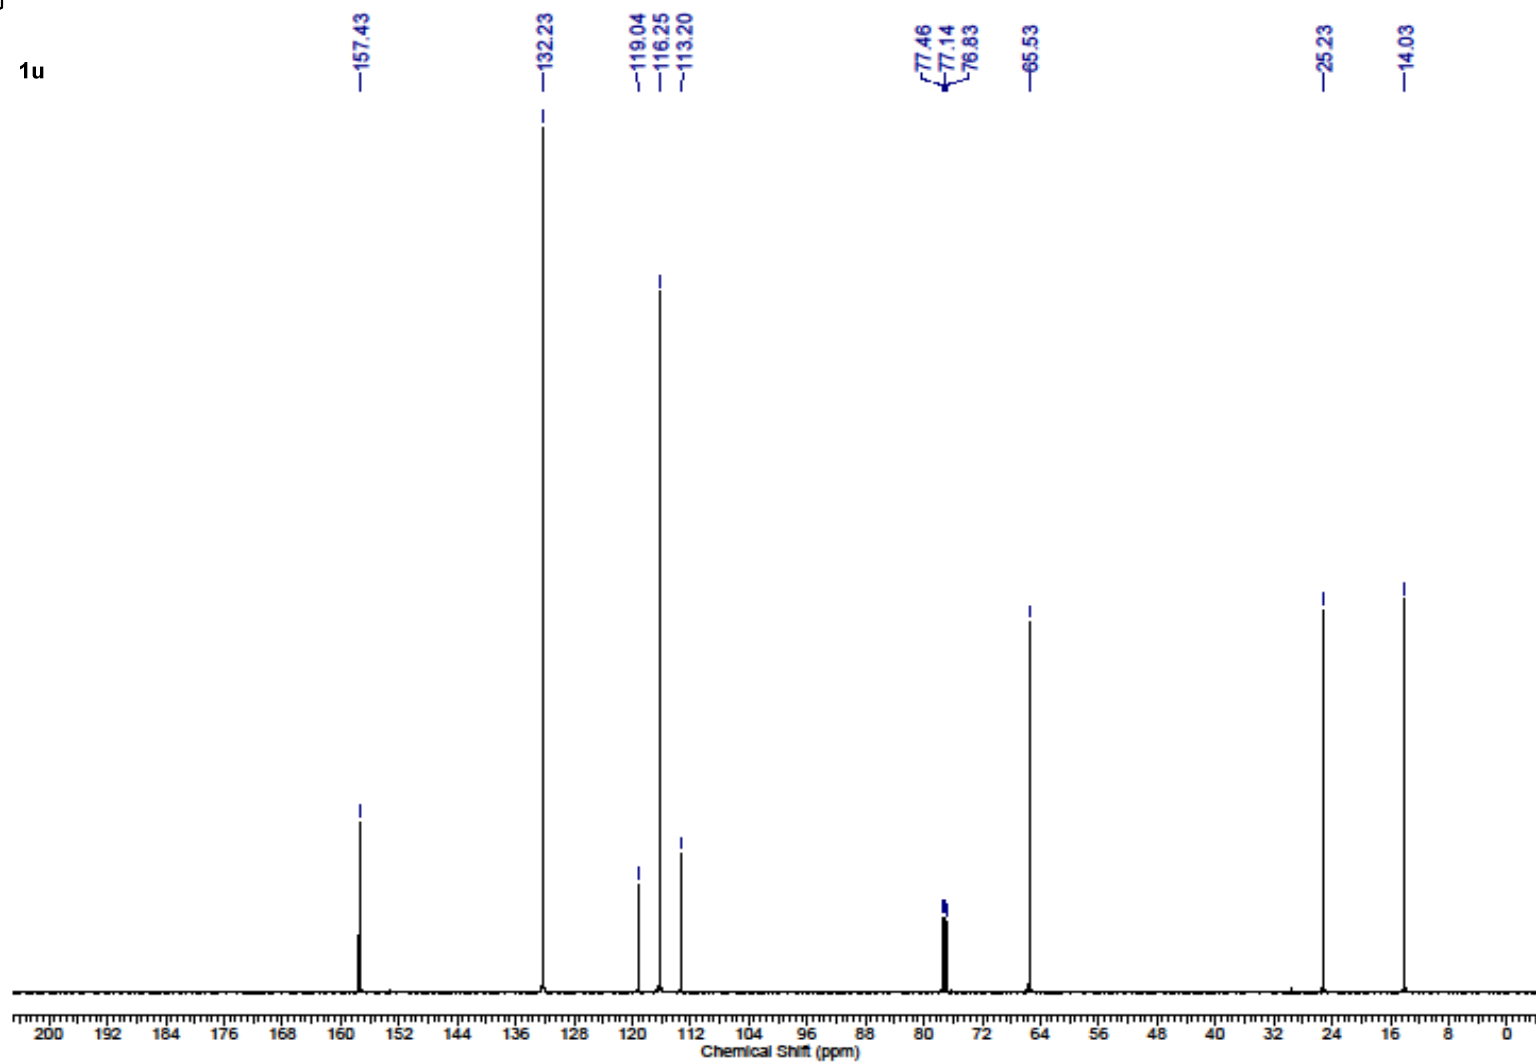



$^1\text{H}$  NMR spectrum of **1v** in  $\text{CDCl}_3$  with 0.05% v/v TMS (400 MHz)

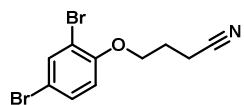

**1v**

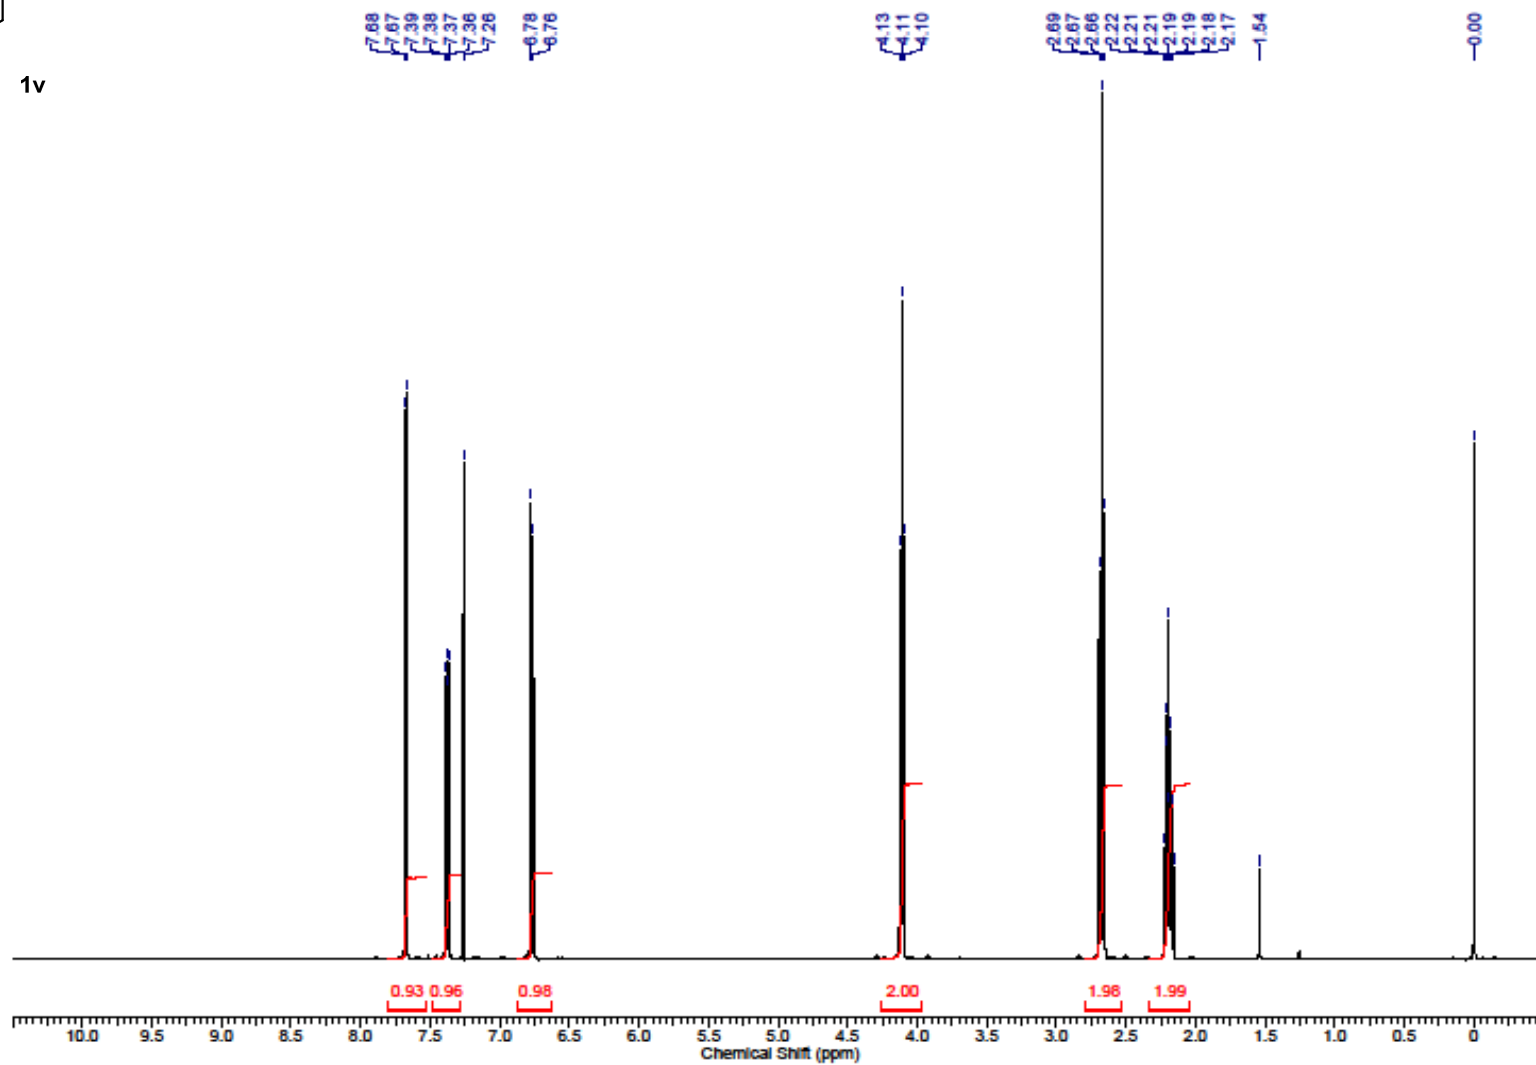

$^{13}\text{C}\{^1\text{H}\}$  NMR spectrum of **1v** in  $\text{CDCl}_3$  with 0.05% v/v TMS (100 MHz)

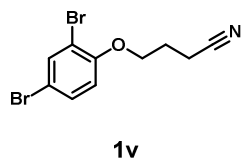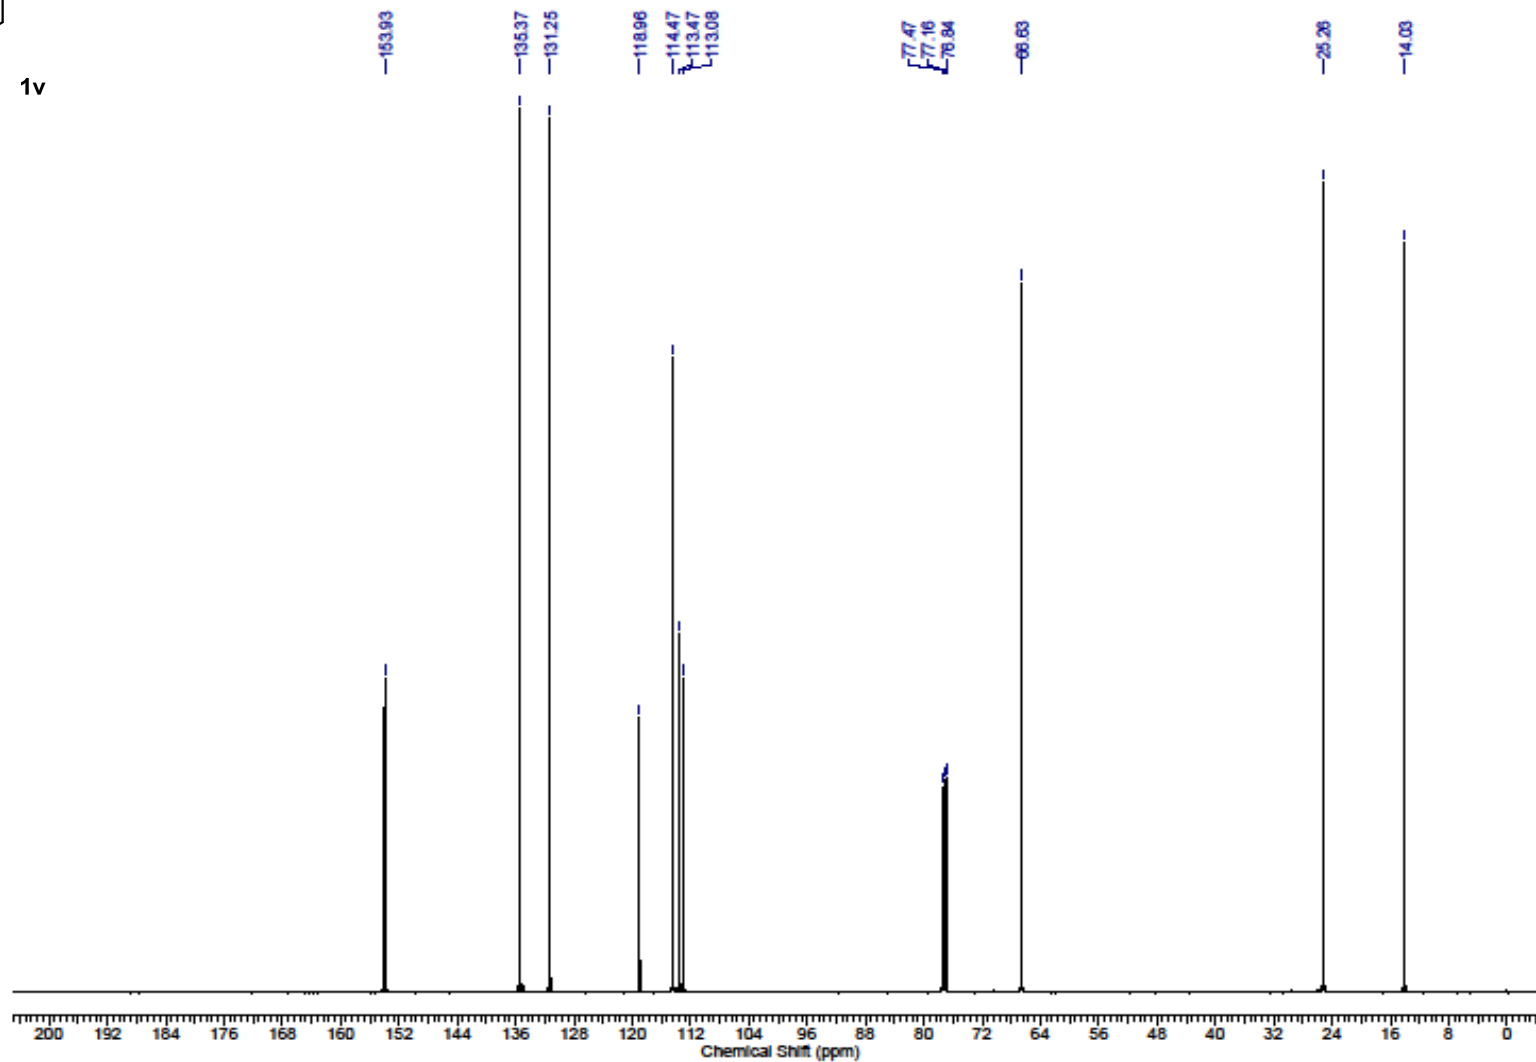

$^1\text{H}$  NMR spectrum of **1w** in  $\text{CDCl}_3$  with 0.05% v/v TMS (400 MHz)

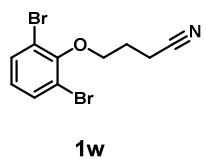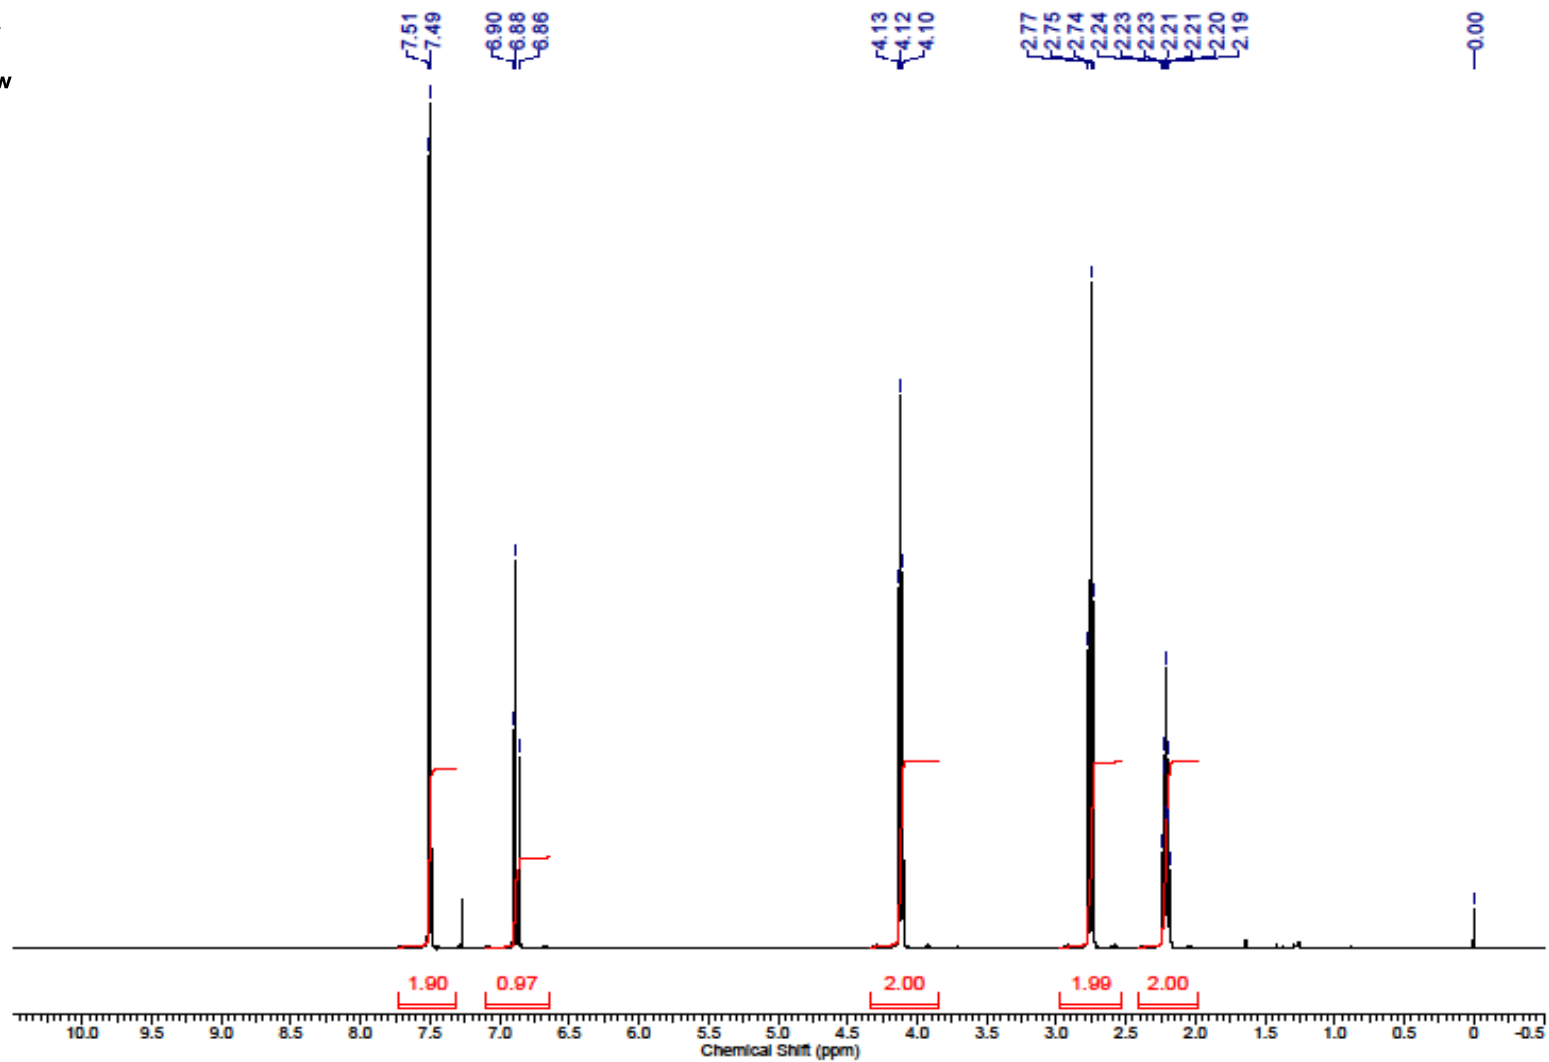

$^{13}\text{C}\{^1\text{H}\}$  NMR spectrum of **1w** in  $\text{CDCl}_3$  with 0.05% v/v TMS (100 MHz)

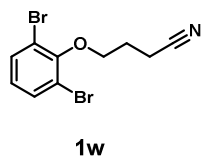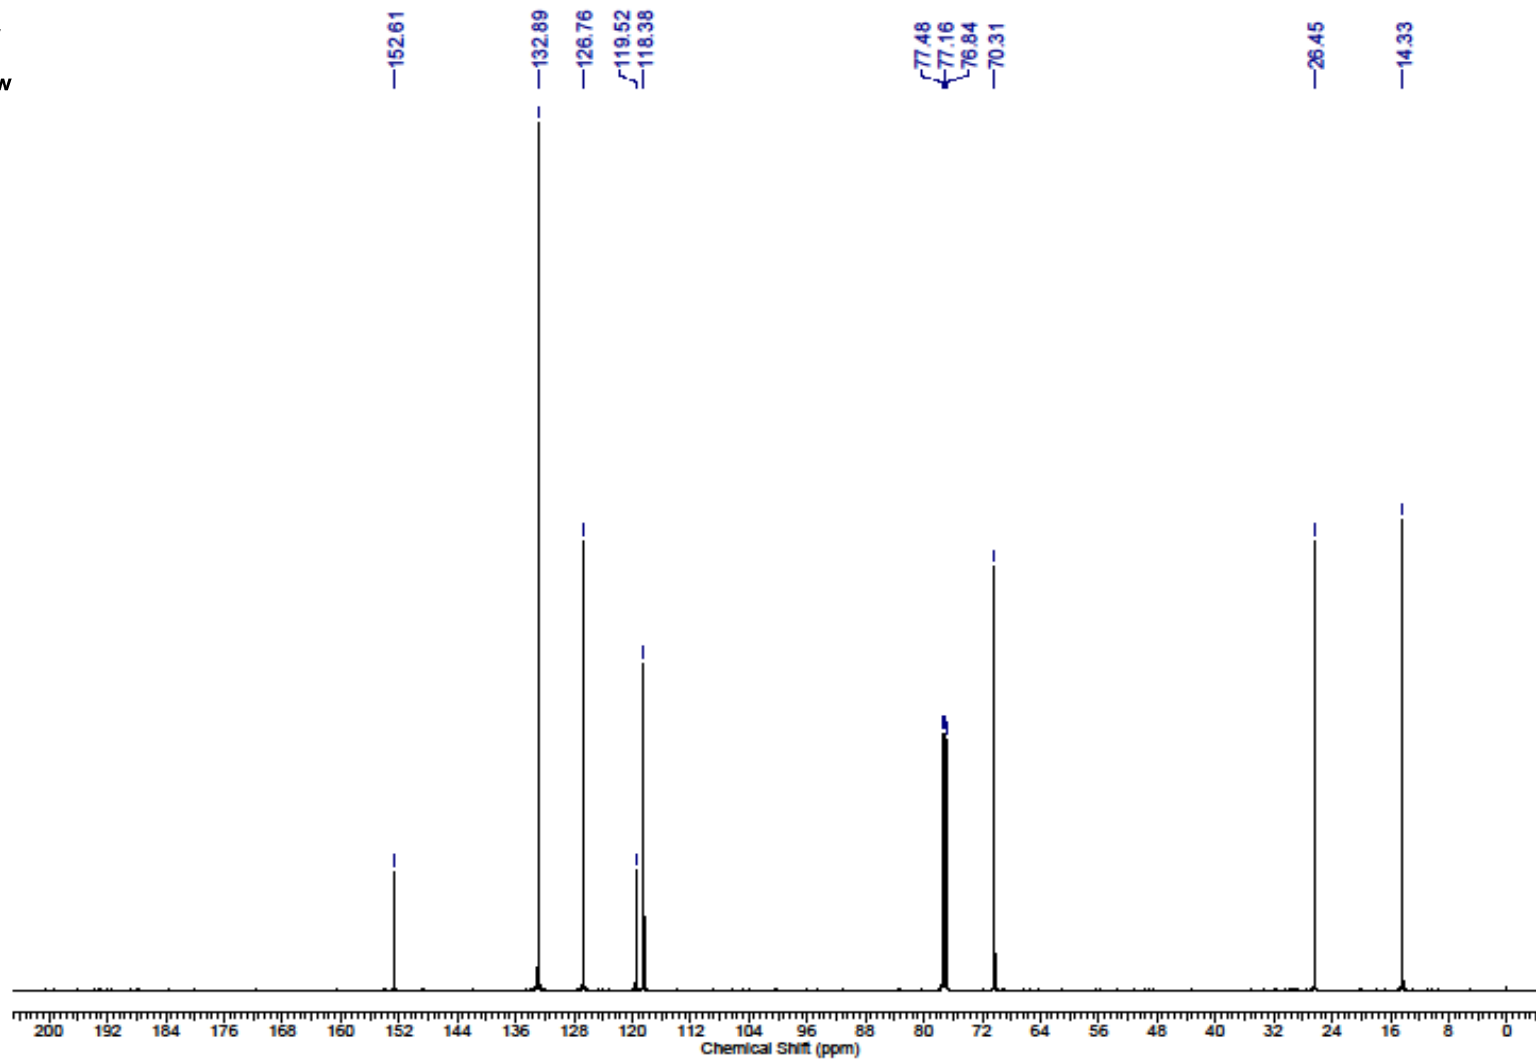

$^1\text{H}$  NMR spectrum of **1x** in  $\text{CDCl}_3$  with 0.05% v/v TMS (400 MHz)

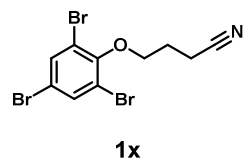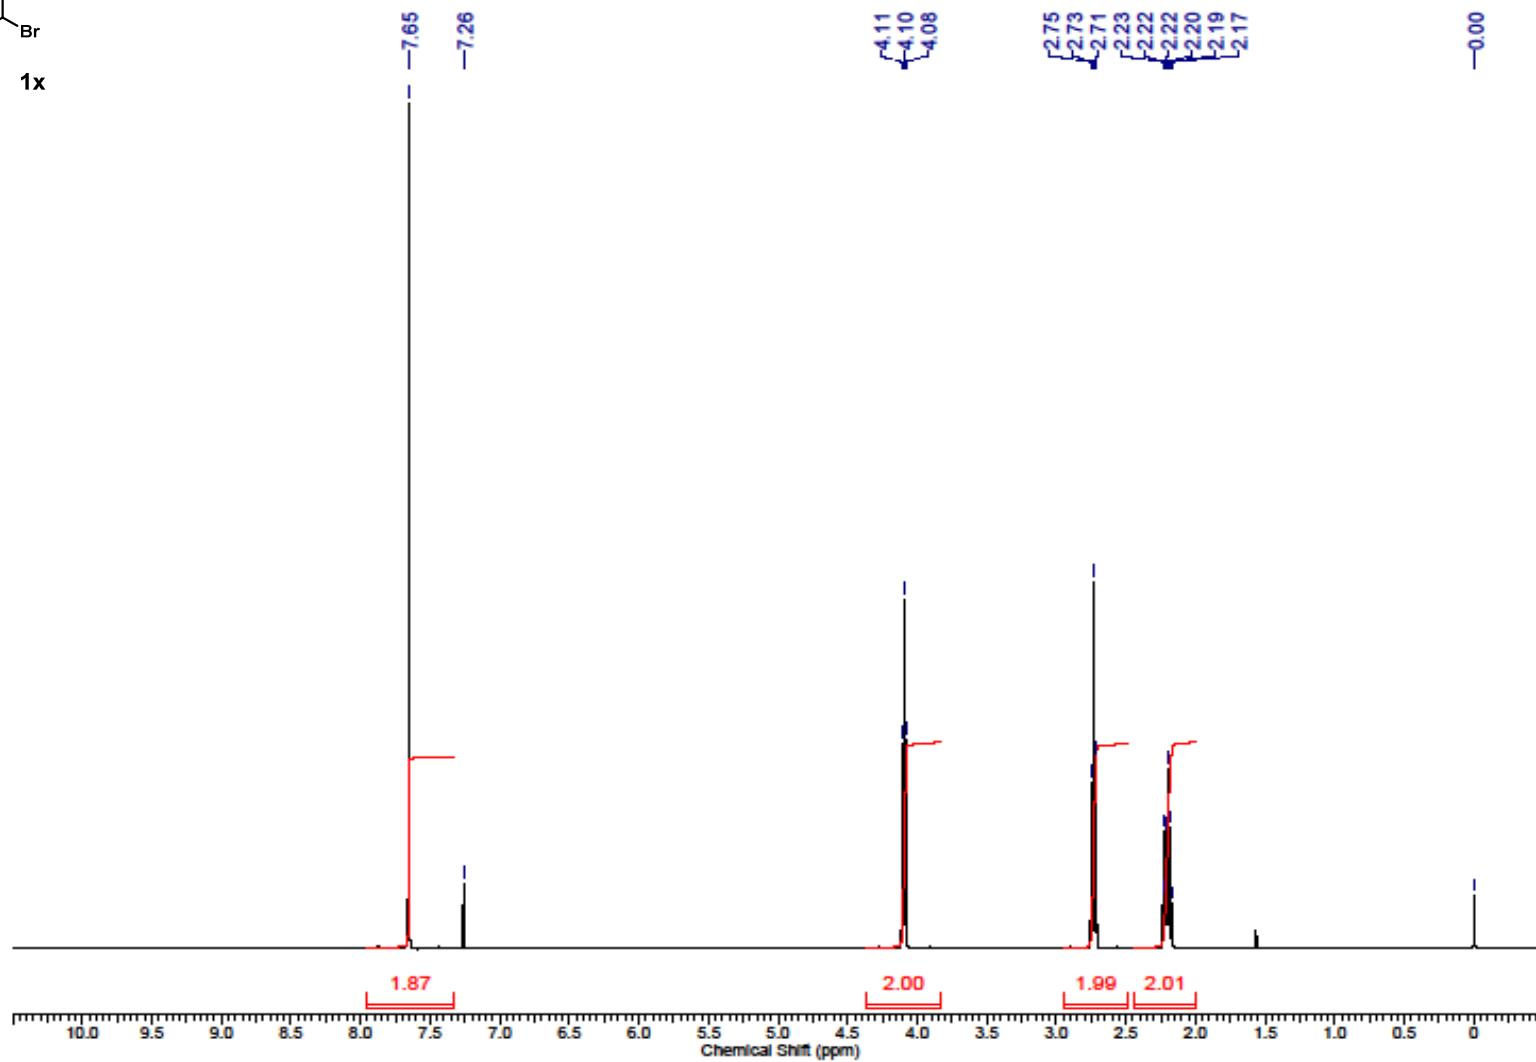

$^{13}\text{C}\{^1\text{H}\}$  NMR spectrum of **1x** in  $\text{CDCl}_3$  with 0.05% v/v TMS (100 MHz)

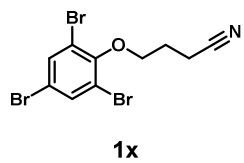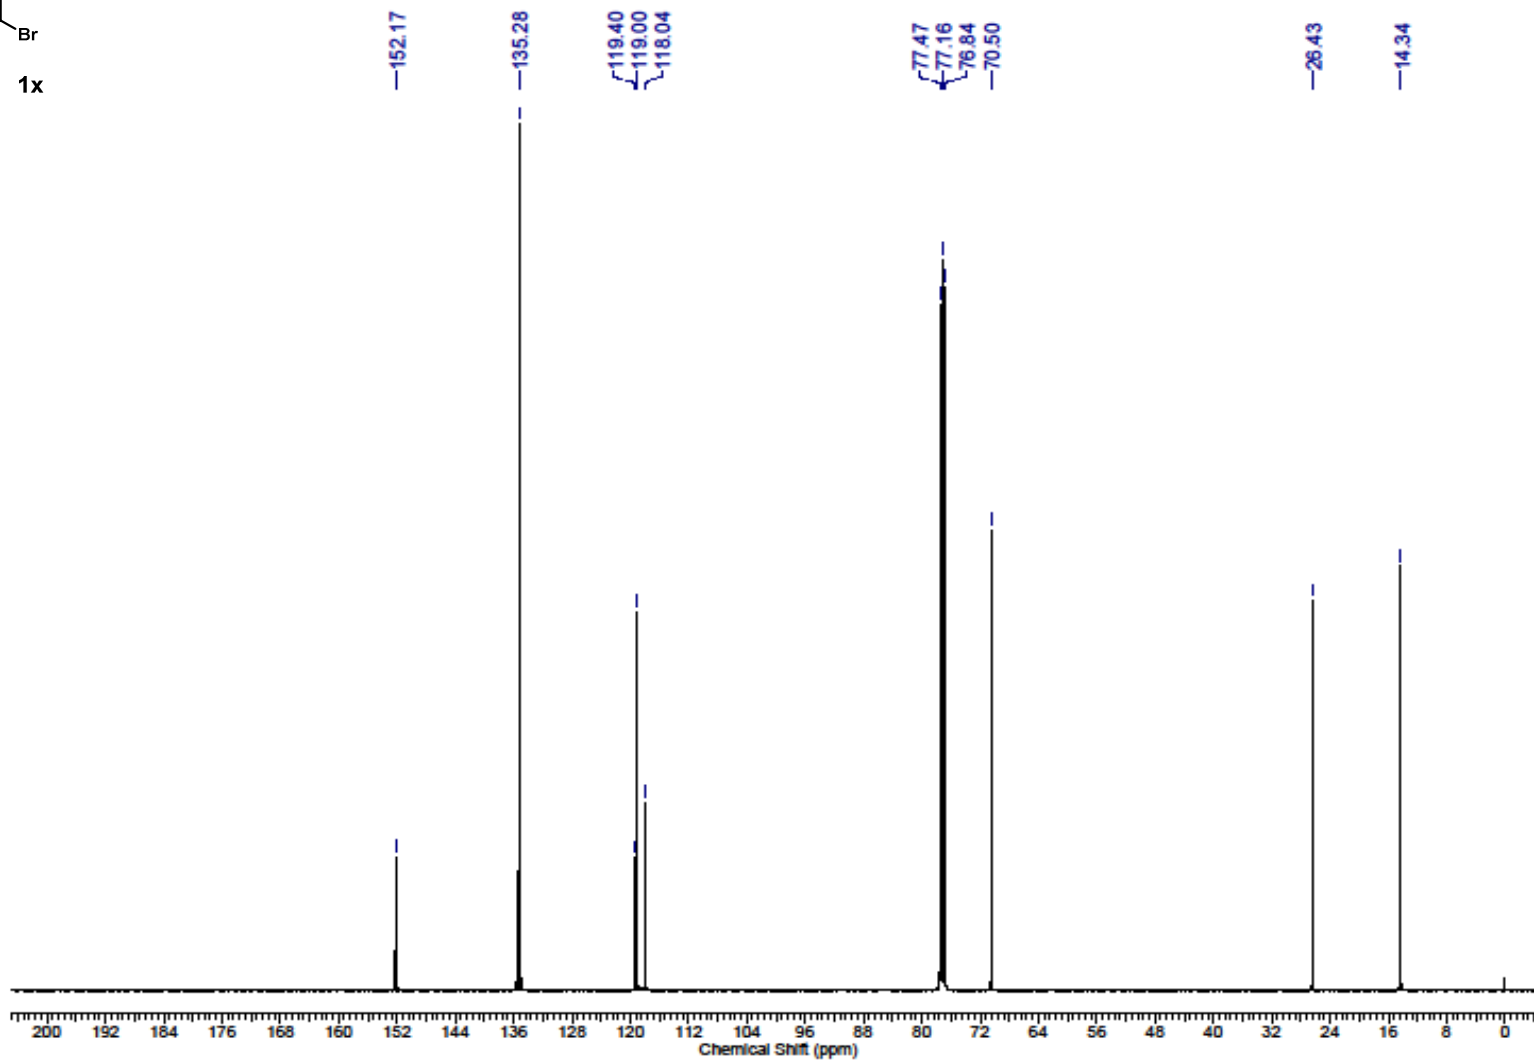

$^1\text{H}$  NMR spectrum of **1y** in  $\text{CDCl}_3$  with 0.05% v/v TMS (400 MHz)

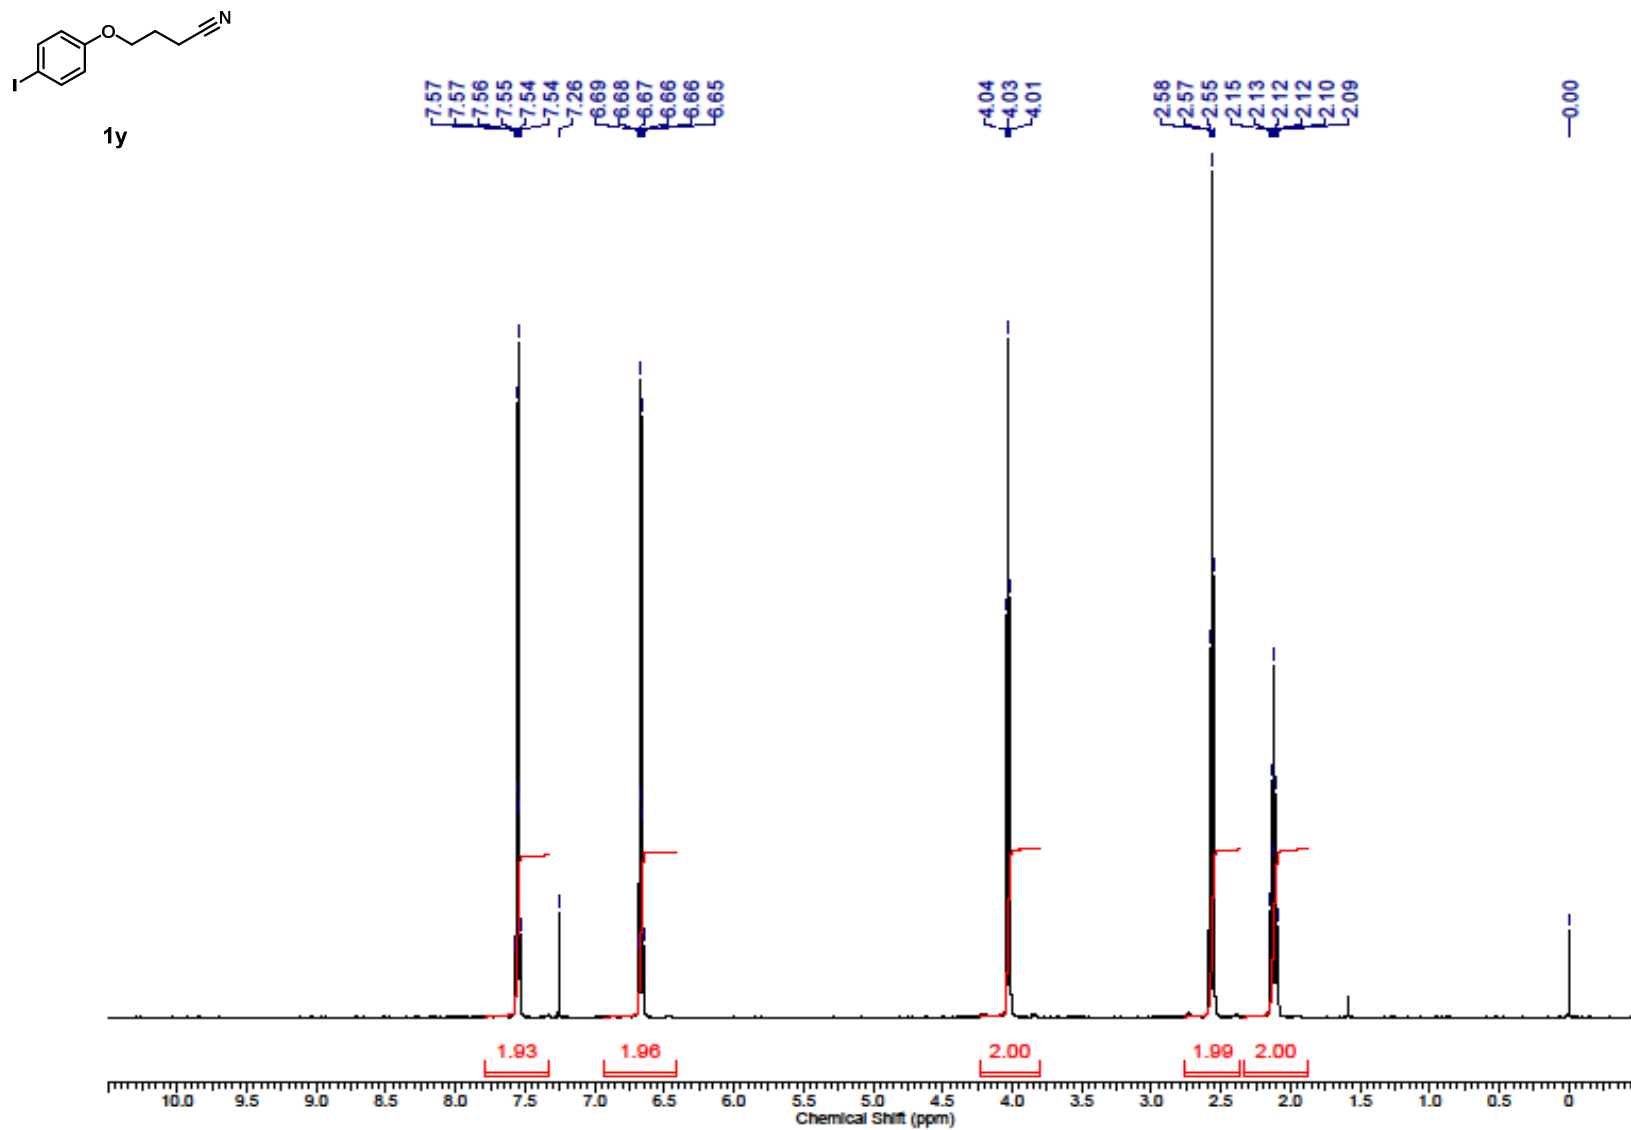

$^{13}\text{C}\{^1\text{H}\}$  NMR spectrum of **1y** in  $\text{CDCl}_3$  with 0.05% v/v TMS (100 MHz)

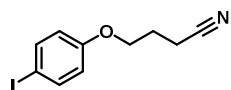

**1y**

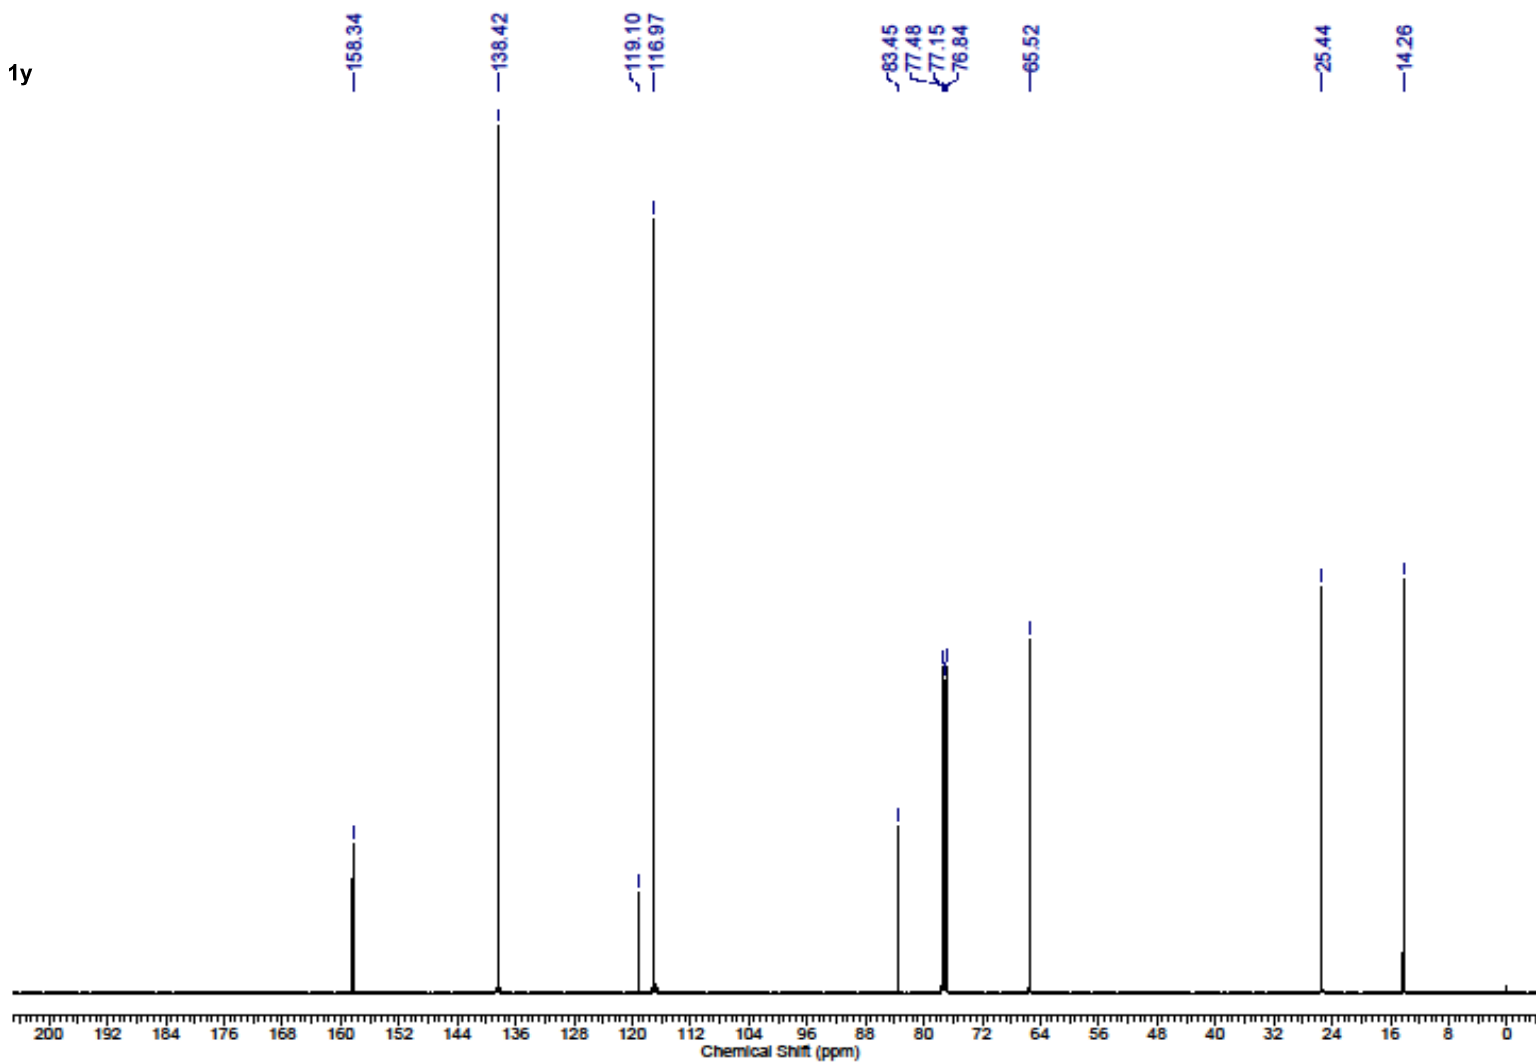



$^1\text{H}$  NMR spectrum of **1z** in  $\text{CDCl}_3$  with 0.05% v/v TMS (400 MHz)

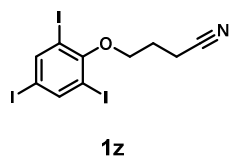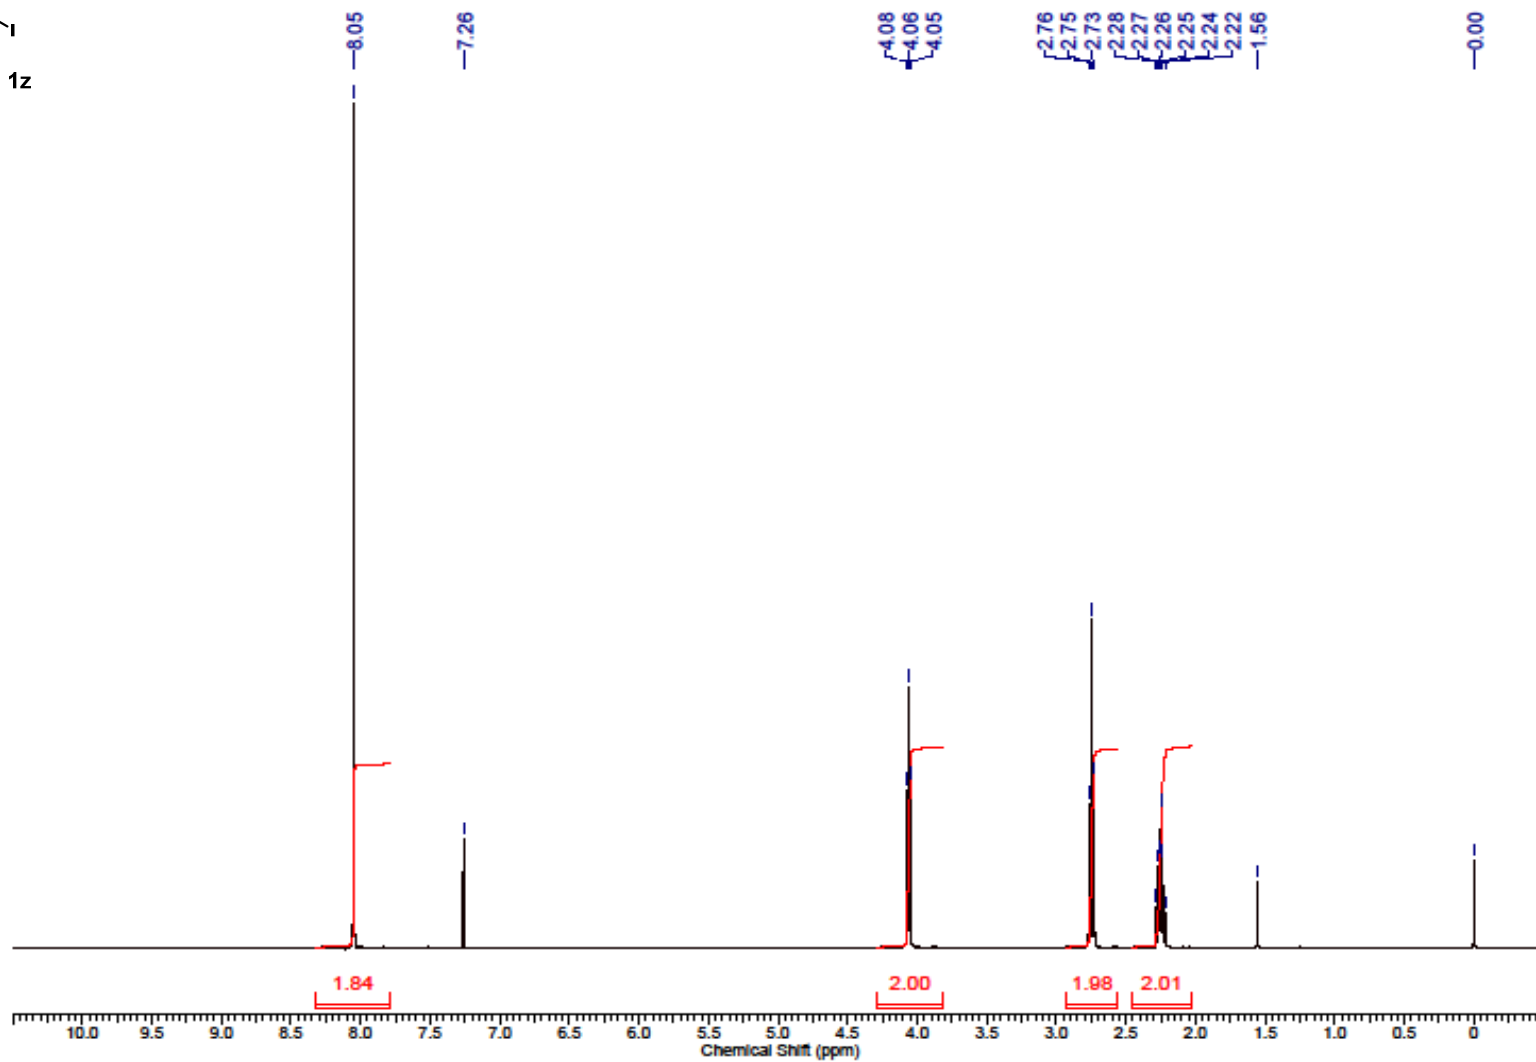

$^{13}\text{C}\{^1\text{H}\}$  NMR spectrum of **1z** in  $\text{CDCl}_3$  with 0.05% v/v TMS (100 MHz)

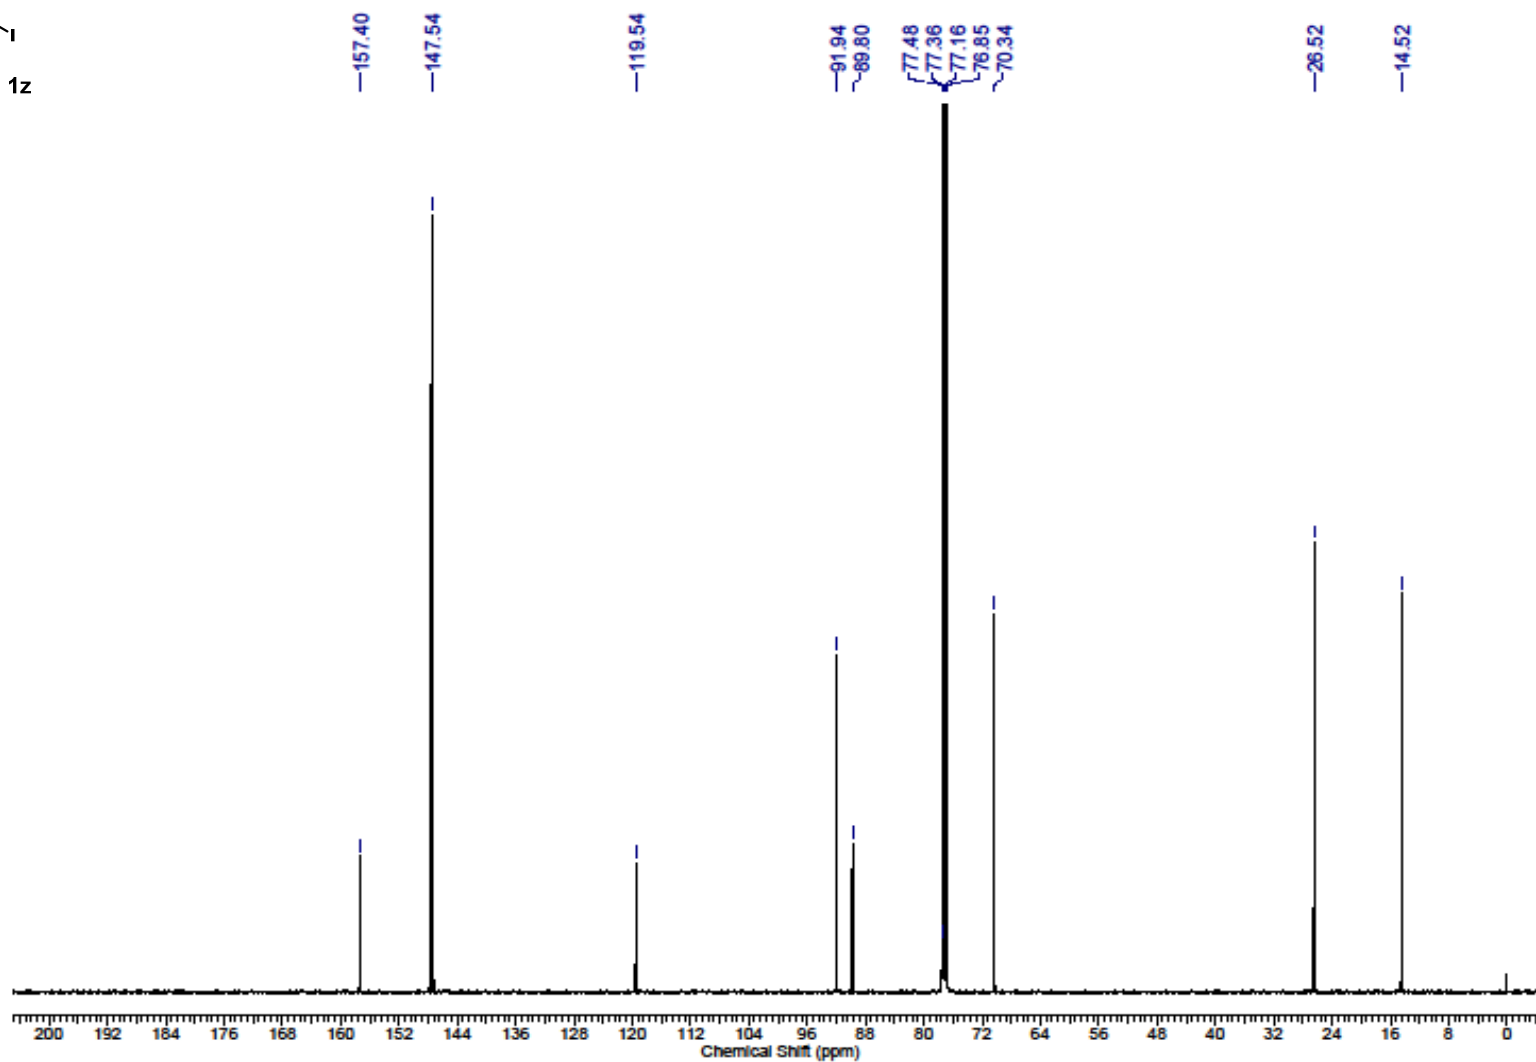

$^1\text{H}$  NMR spectrum of **2a** in  $\text{CDCl}_3$  with 0.05% v/v TMS (400 MHz)

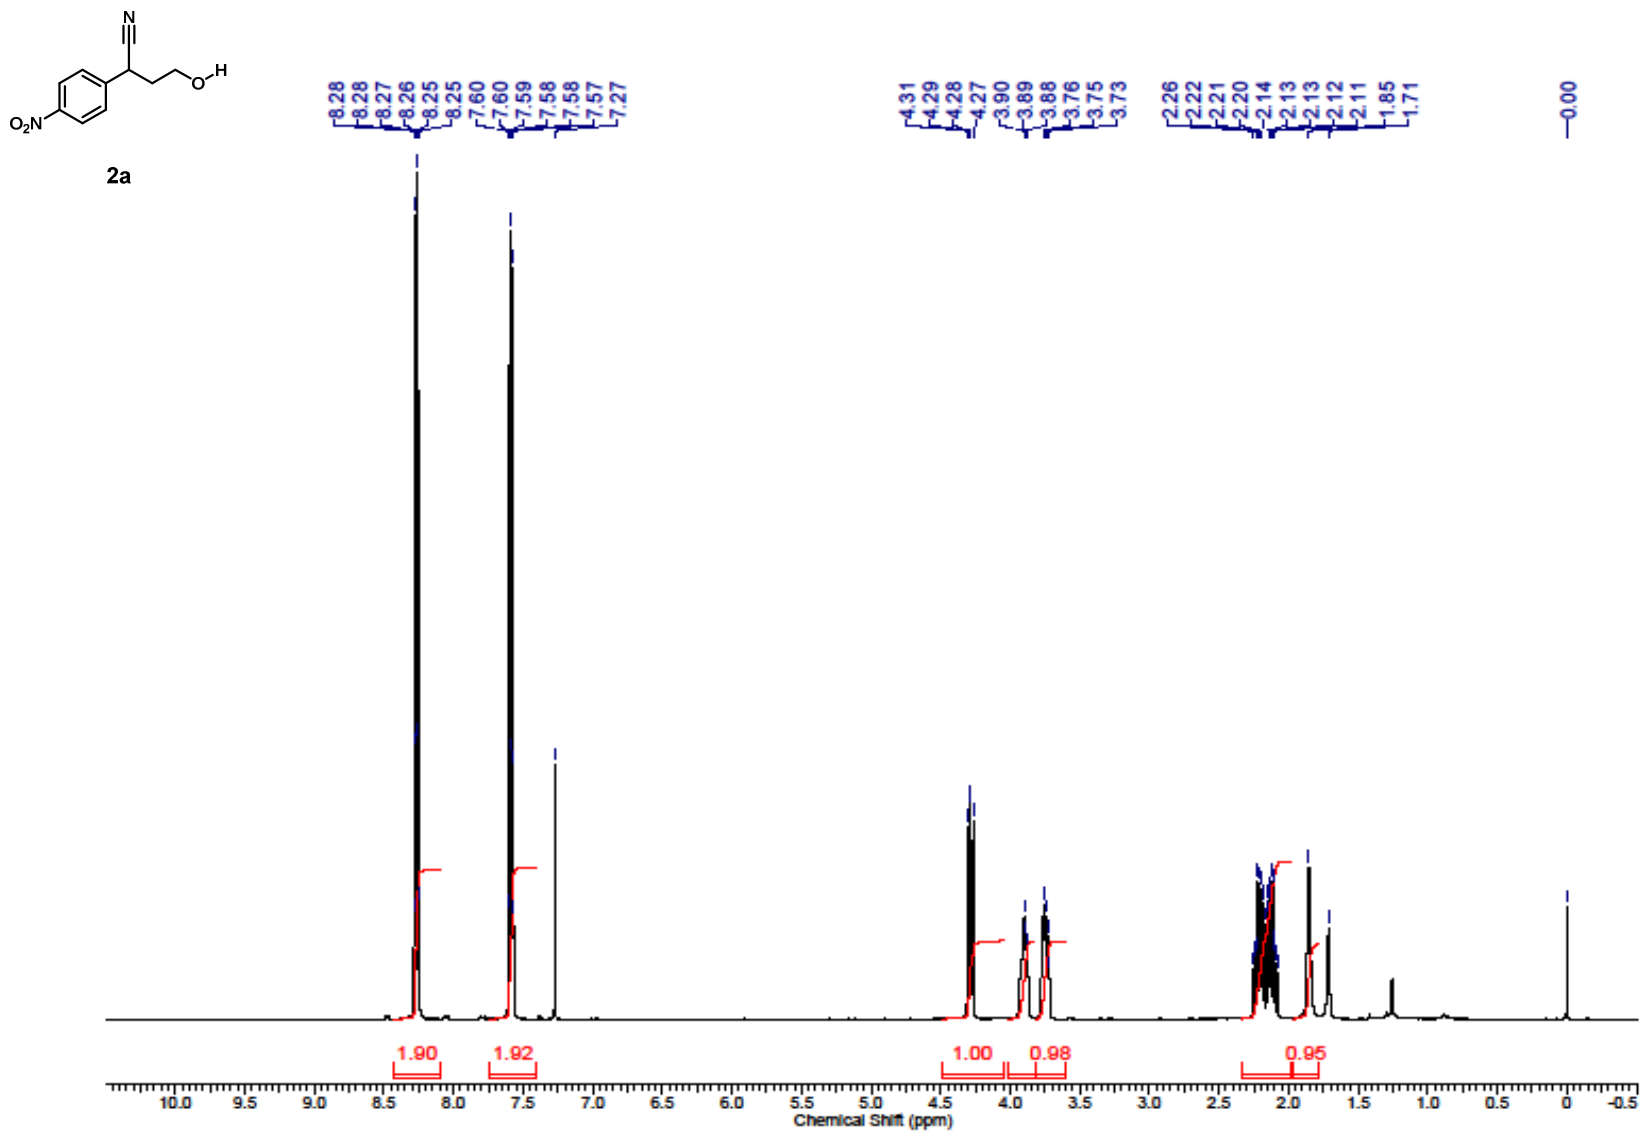

$^1\text{H}$  NMR spectrum of **2a** in  $(\text{CD}_3)_2\text{SO}$  with 0.05% v/v TMS (400 MHz)

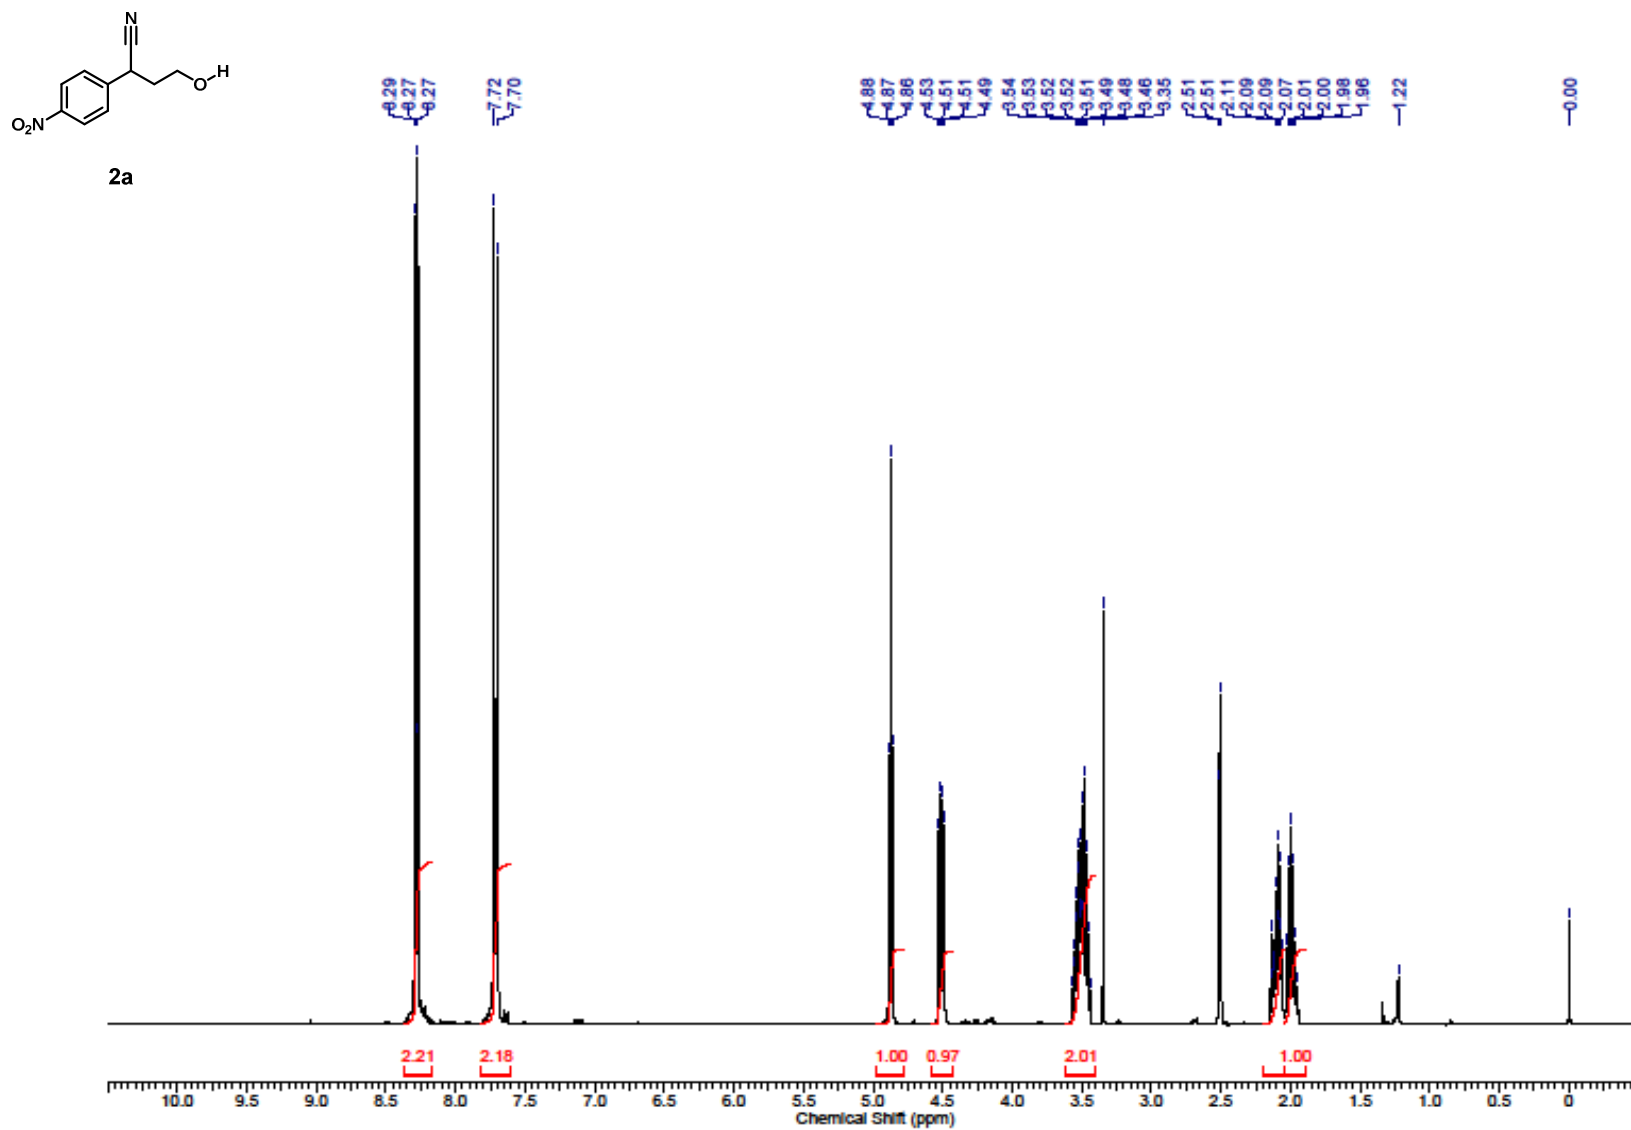

$^{13}\text{C}\{^1\text{H}\}$  NMR spectrum of **2a** in  $\text{CDCl}_3$  with 0.05% v/v TMS (100 MHz)

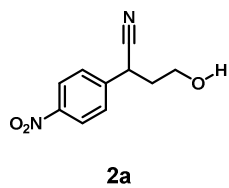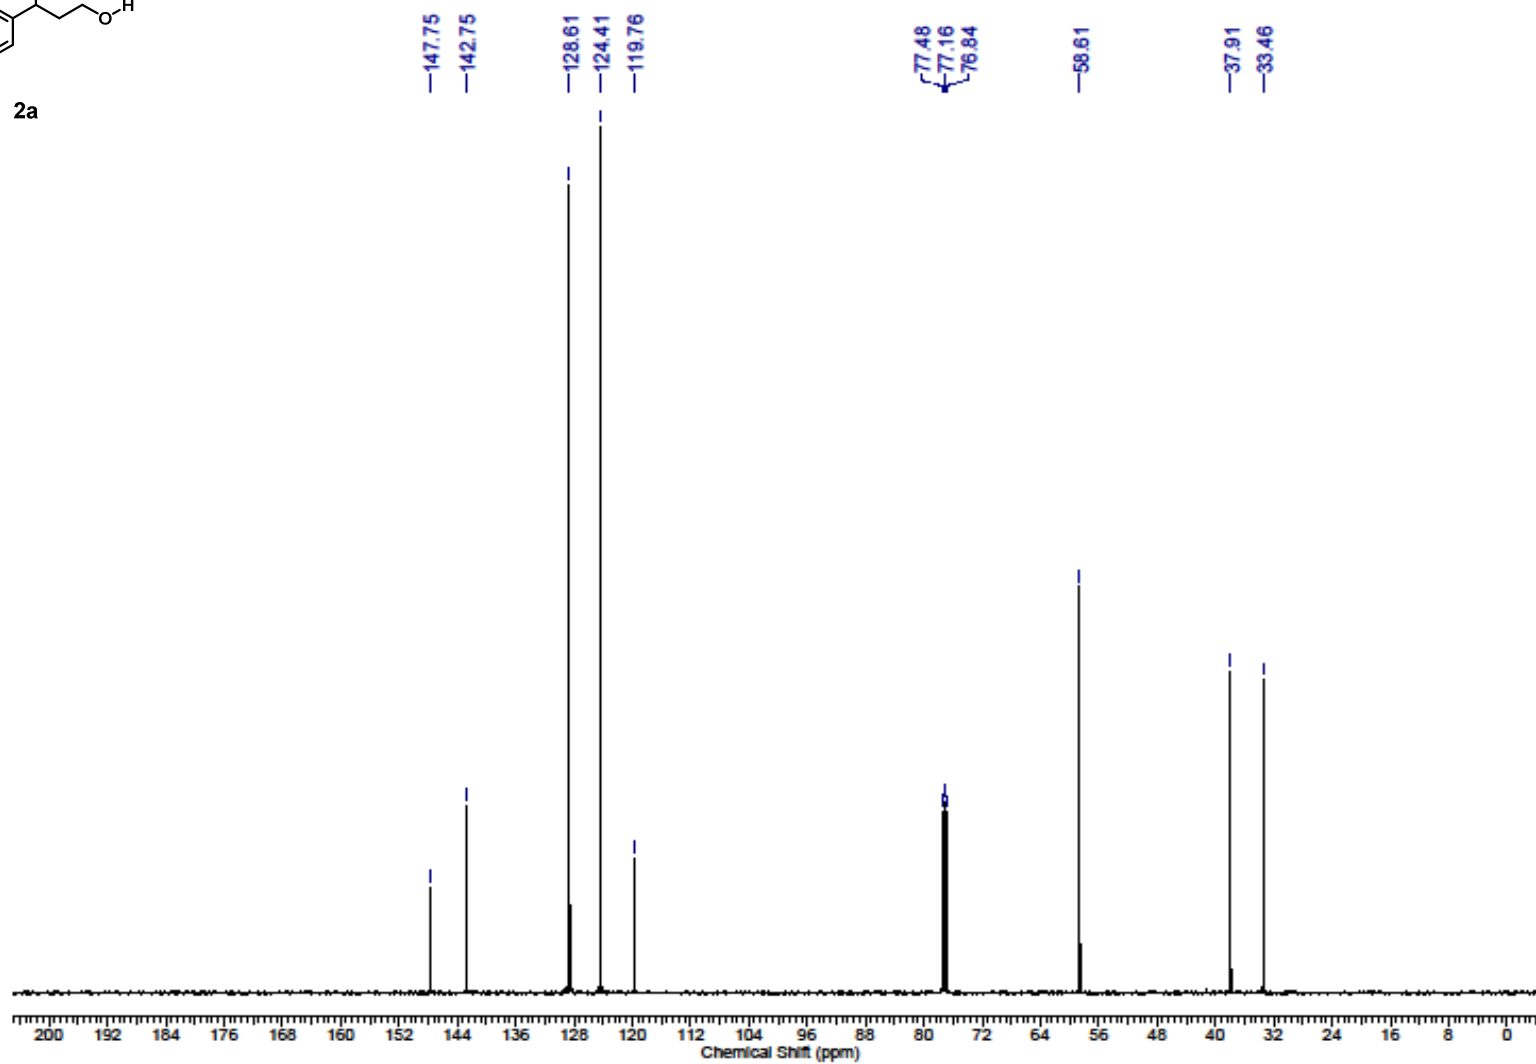

$^{13}\text{C}\{^1\text{H}\}$  NMR spectrum of **2a** in  $(\text{CD}_3)_2\text{SO}$  with 0.05% v/v TMS (100 MHz)

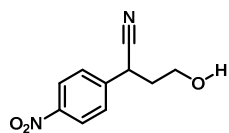

**2a**

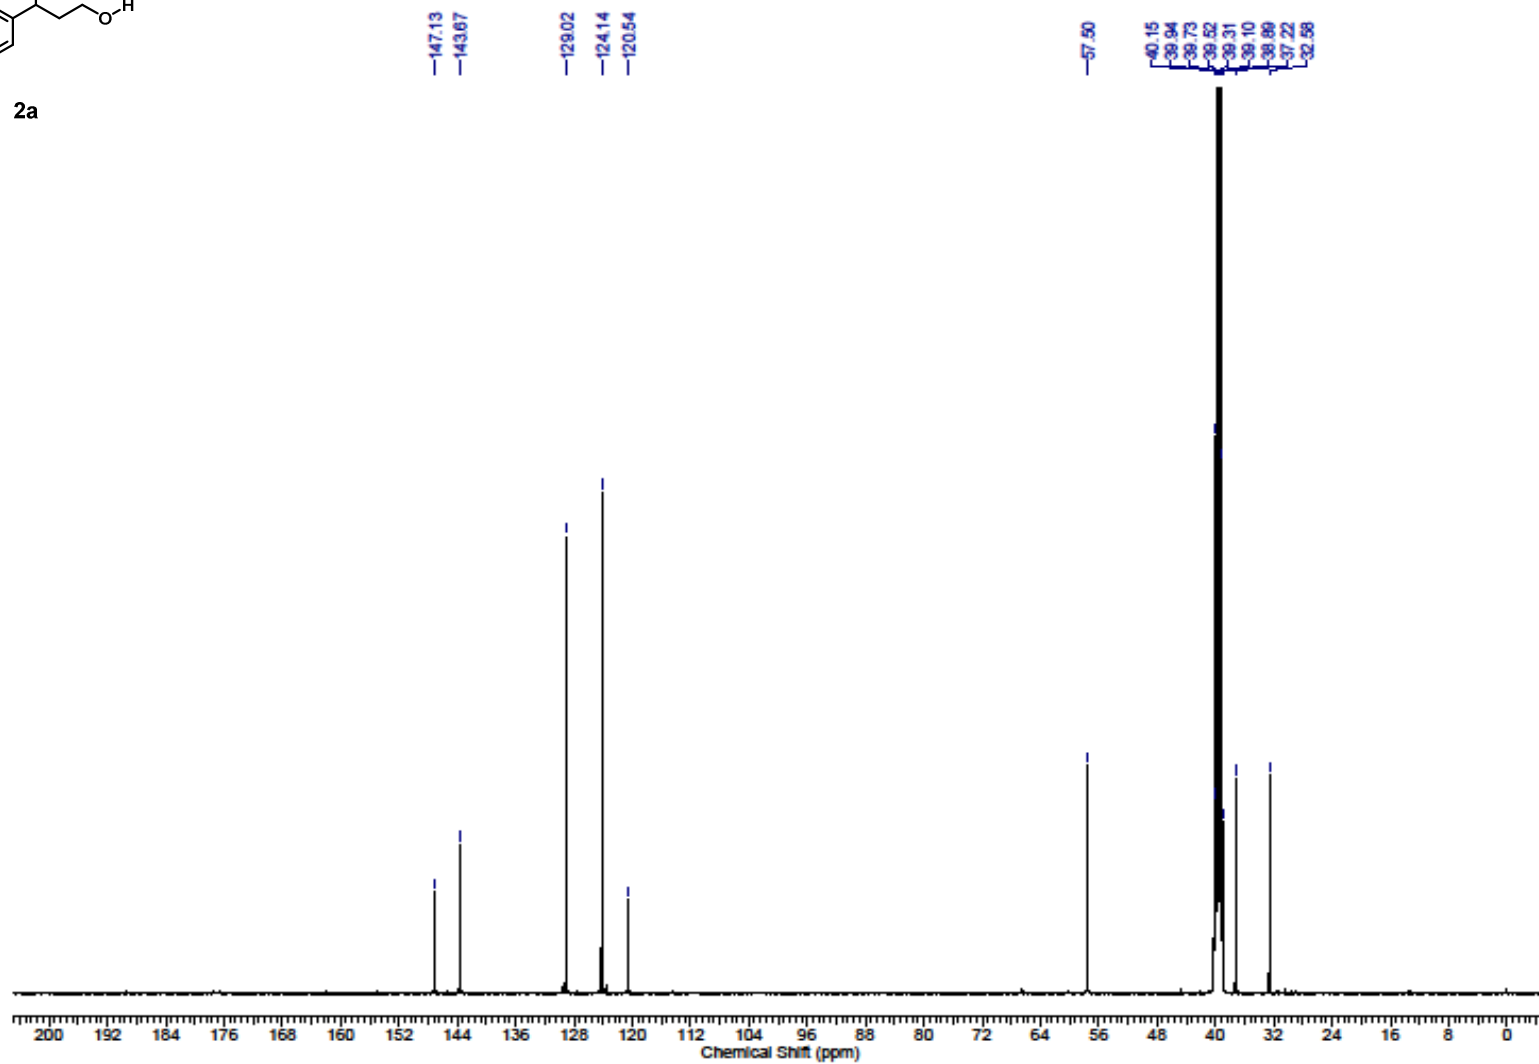

$^1\text{H}$  NMR spectrum of **2c** in  $\text{CDCl}_3$  with 0.05% v/v TMS (400 MHz)

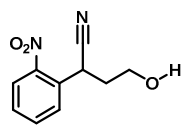

**2c**

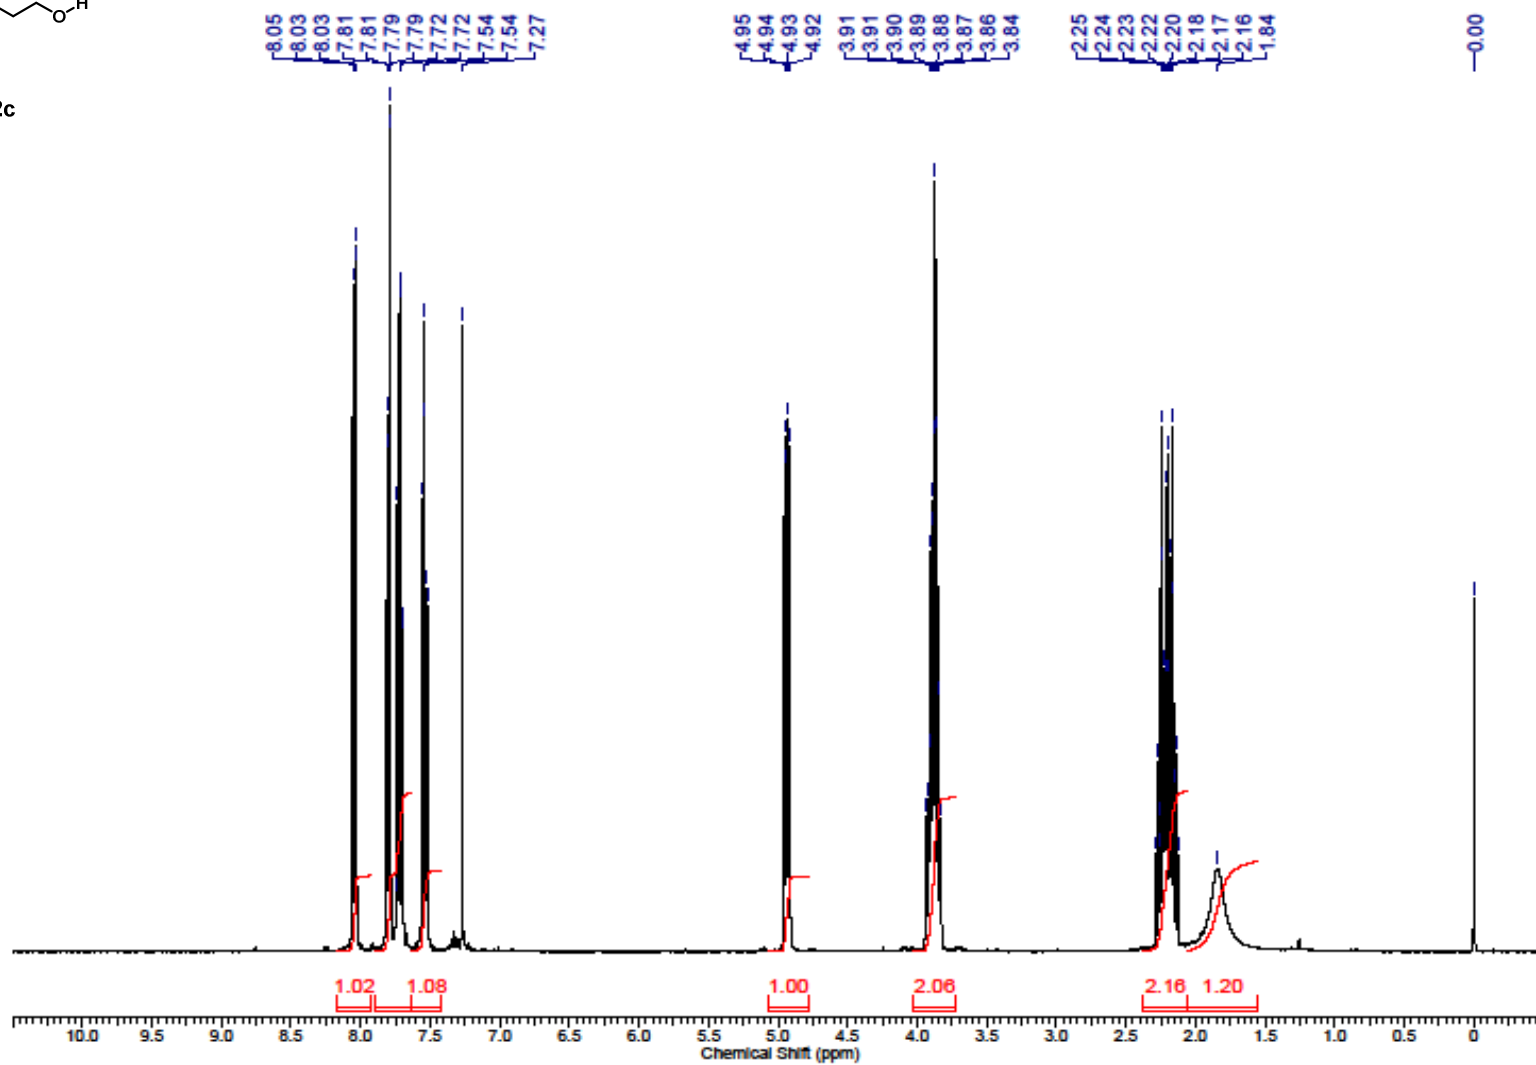

$^{13}\text{C}\{^1\text{H}\}$  NMR spectrum of **2c** in  $\text{CDCl}_3$  with 0.05% v/v TMS (100 MHz)



**2c**

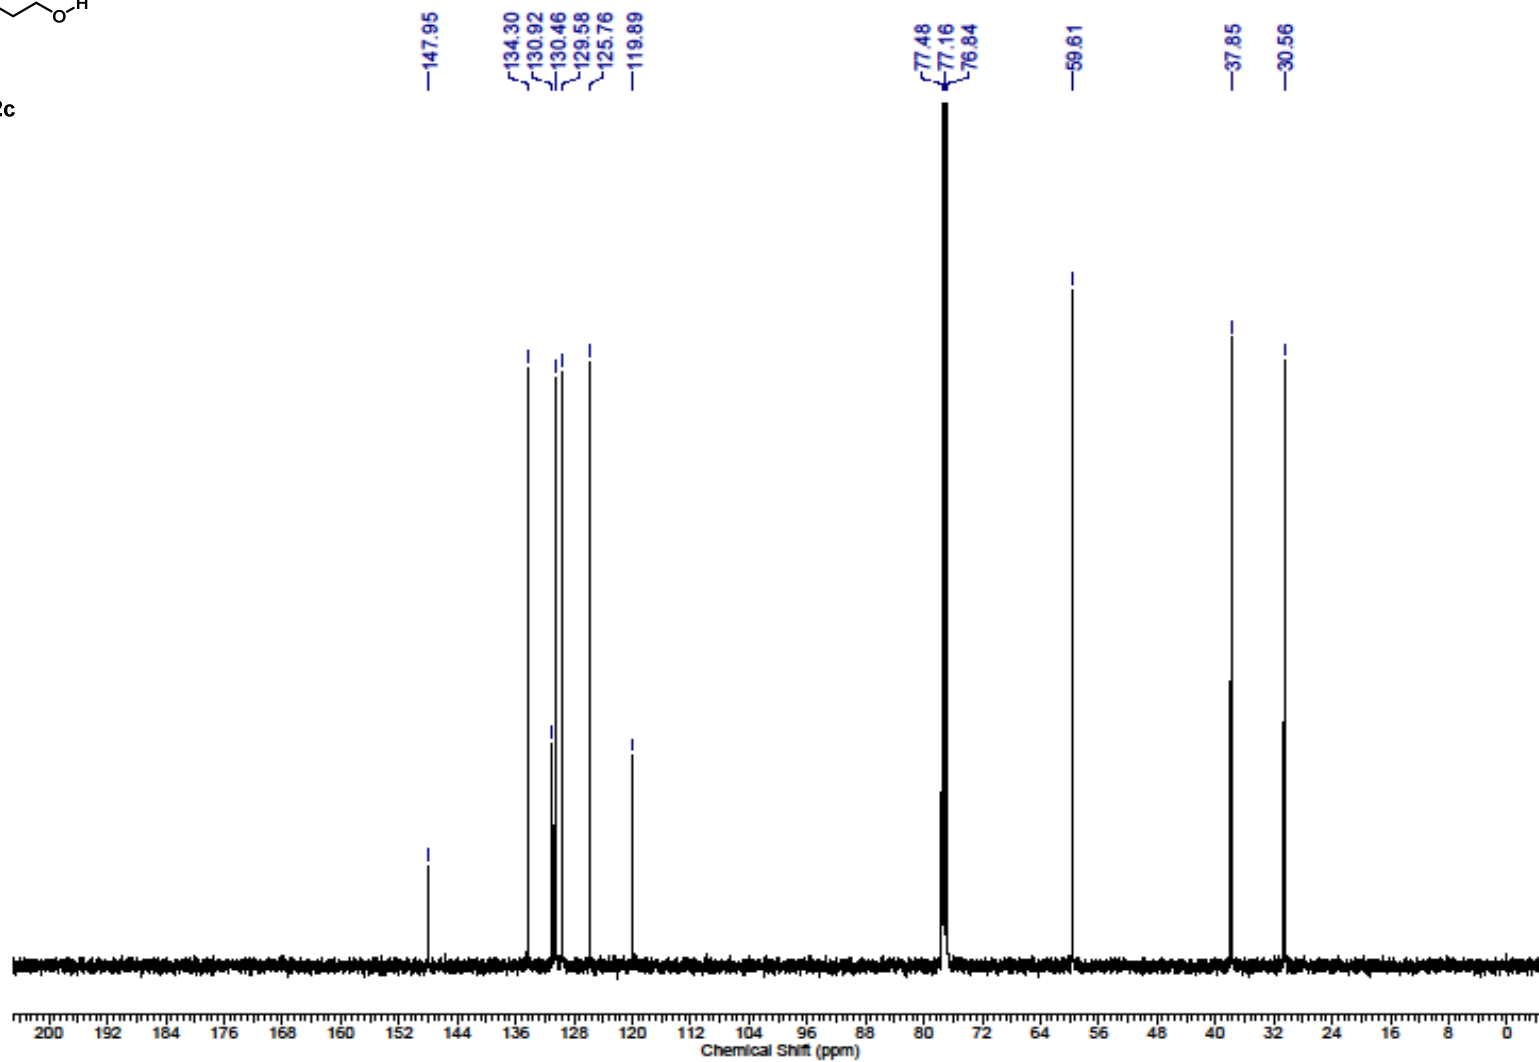



<sup>1</sup>H NMR spectrum of **2d** in CDCl<sub>3</sub> with 0.05% v/v TMS (400 MHz)

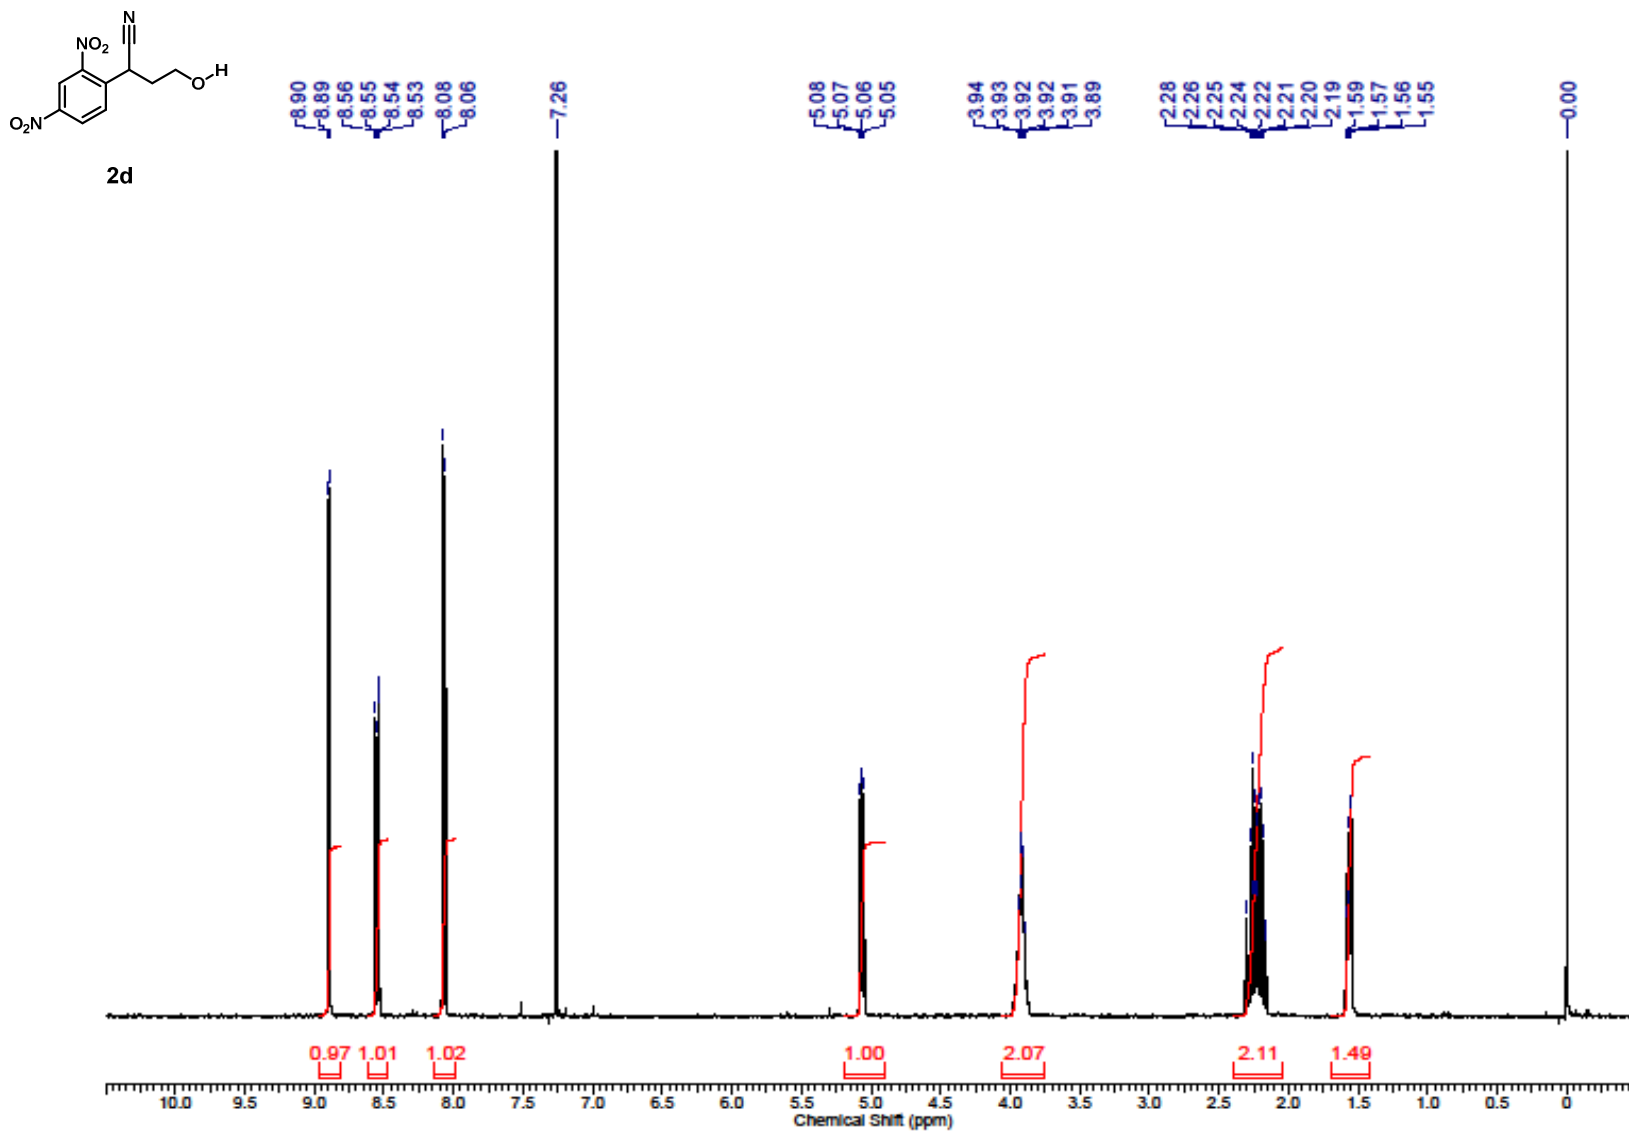

$^{13}\text{C}\{^1\text{H}\}$  NMR spectrum of **2d** in  $\text{CDCl}_3$  with 0.05% v/v TMS (100 MHz)

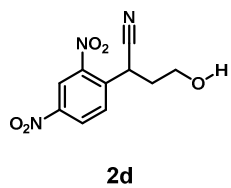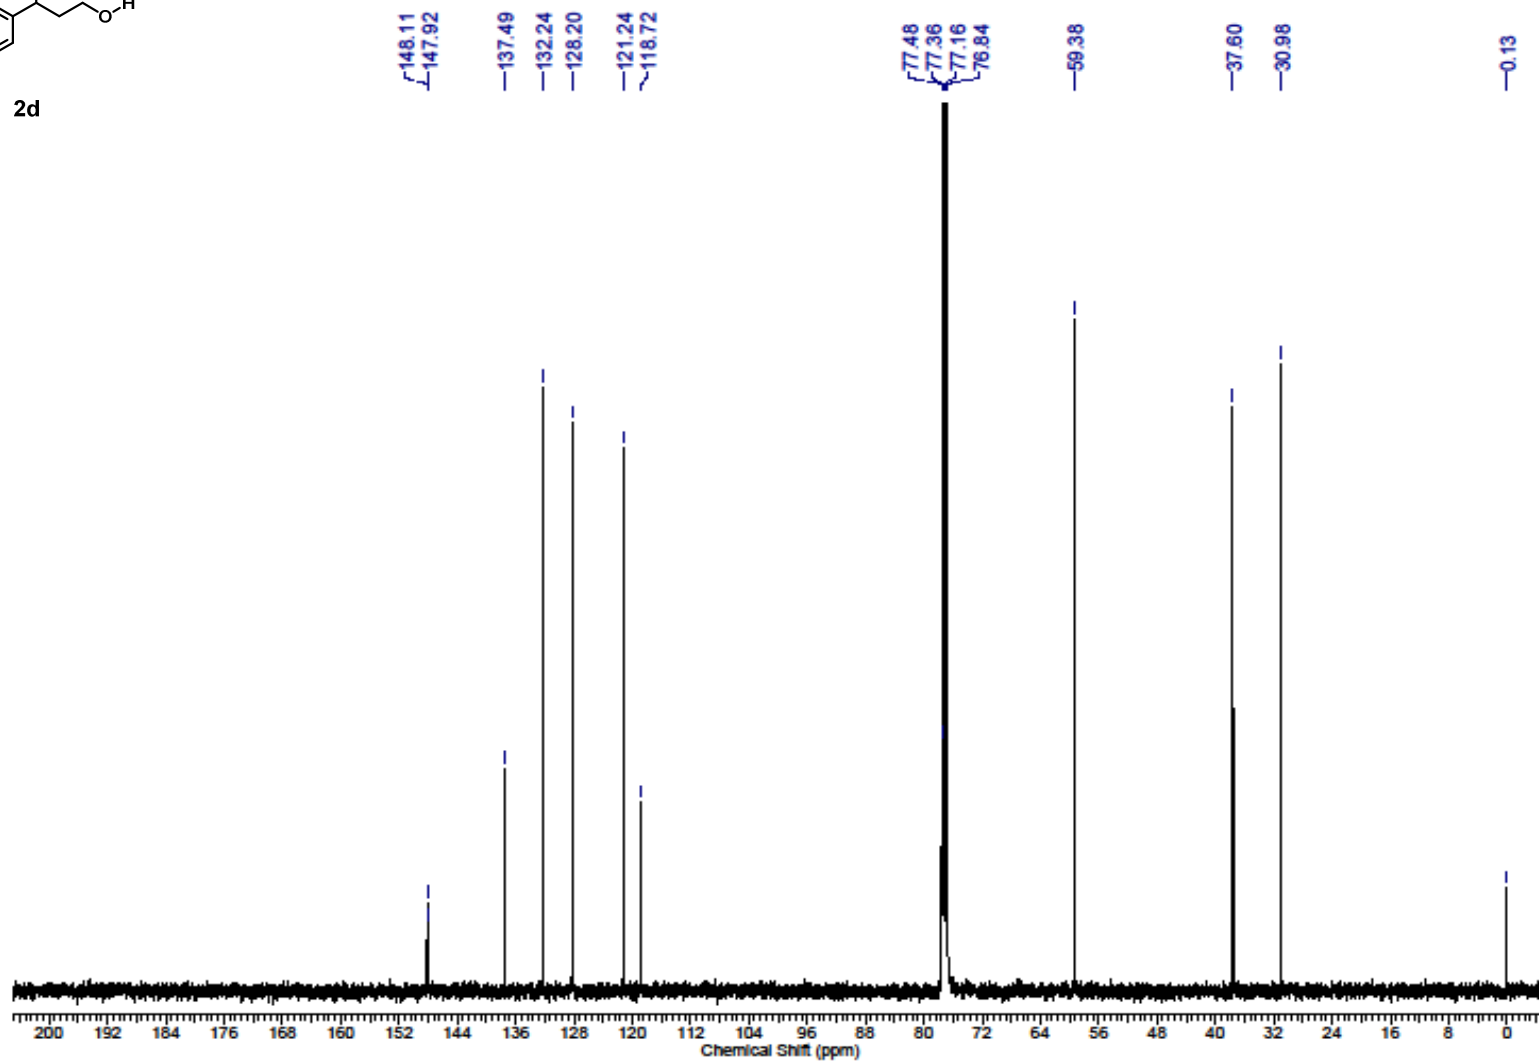

$^1\text{H}$  NMR spectrum of **2e** in  $\text{CDCl}_3$  with 0.05% v/v TMS (400 MHz)

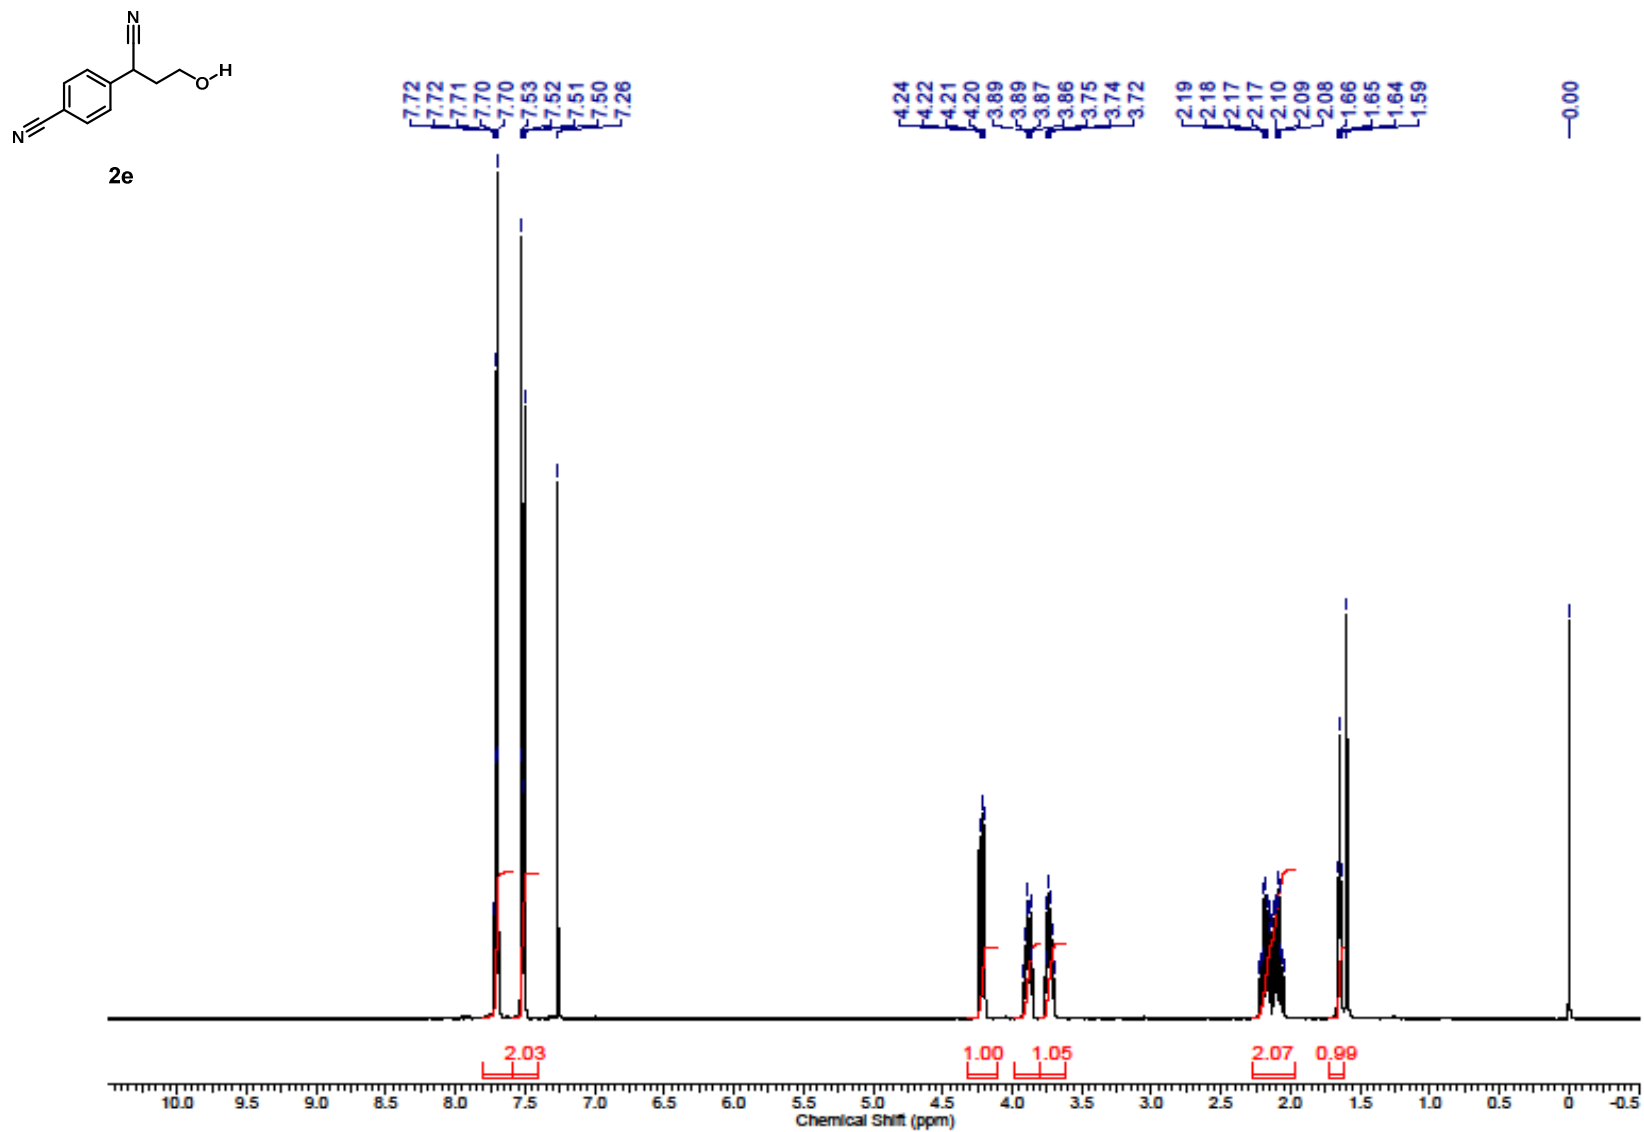

$^{13}\text{C}\{^1\text{H}\}$  NMR spectrum of **2e** in  $\text{CDCl}_3$  with 0.05% v/v TMS (100 MHz)

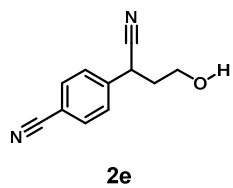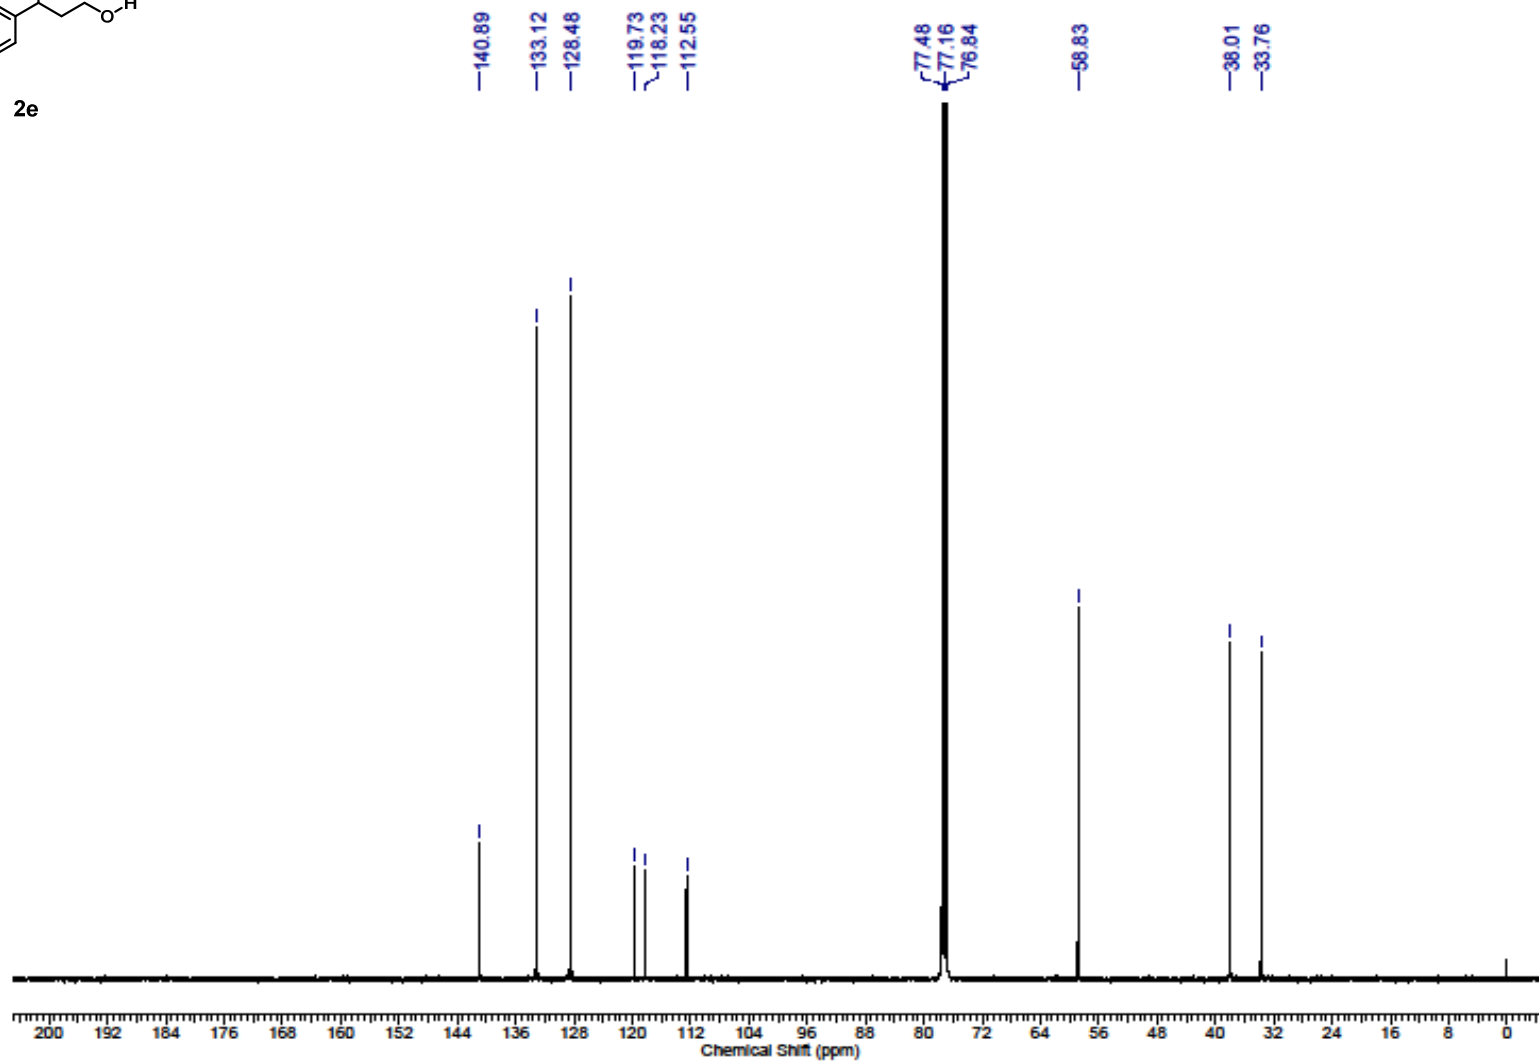

$^1\text{H}$  NMR spectrum of **2f** in  $\text{CDCl}_3$  with 0.05% v/v TMS (400 MHz)

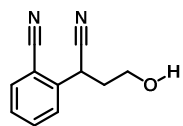

**2f**

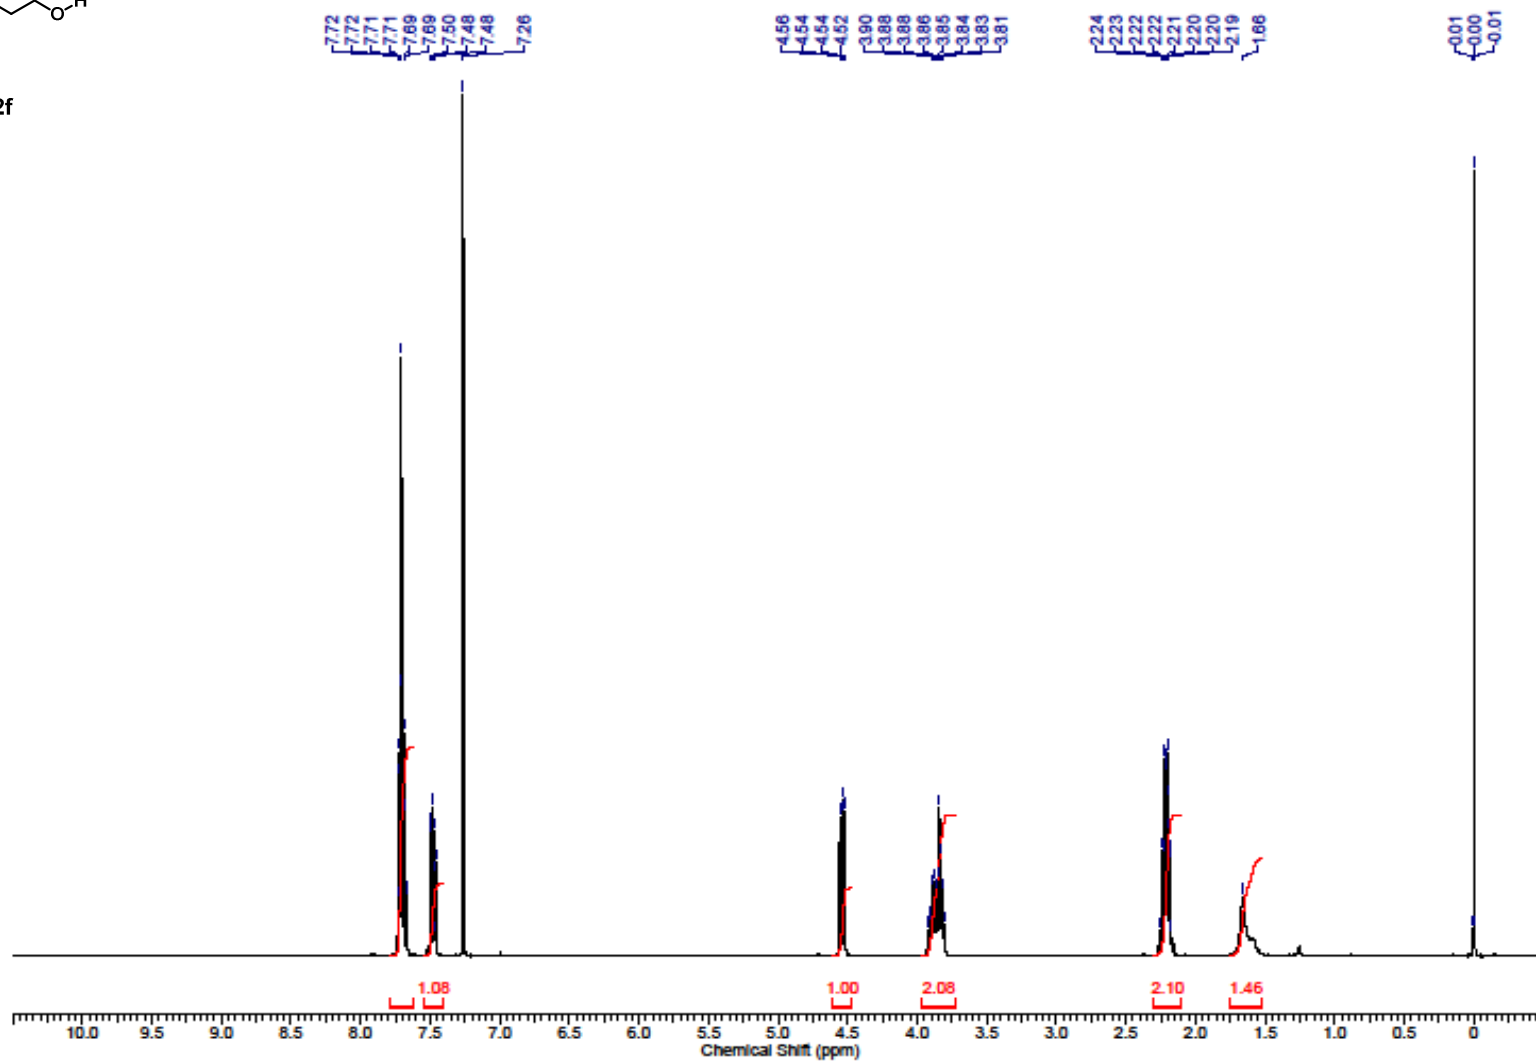

$^{13}\text{C}\{^1\text{H}\}$  NMR spectrum of **2f** in  $\text{CDCl}_3$  with 0.05% v/v TMS (100 MHz)

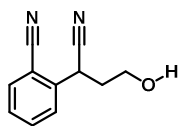

**2f**

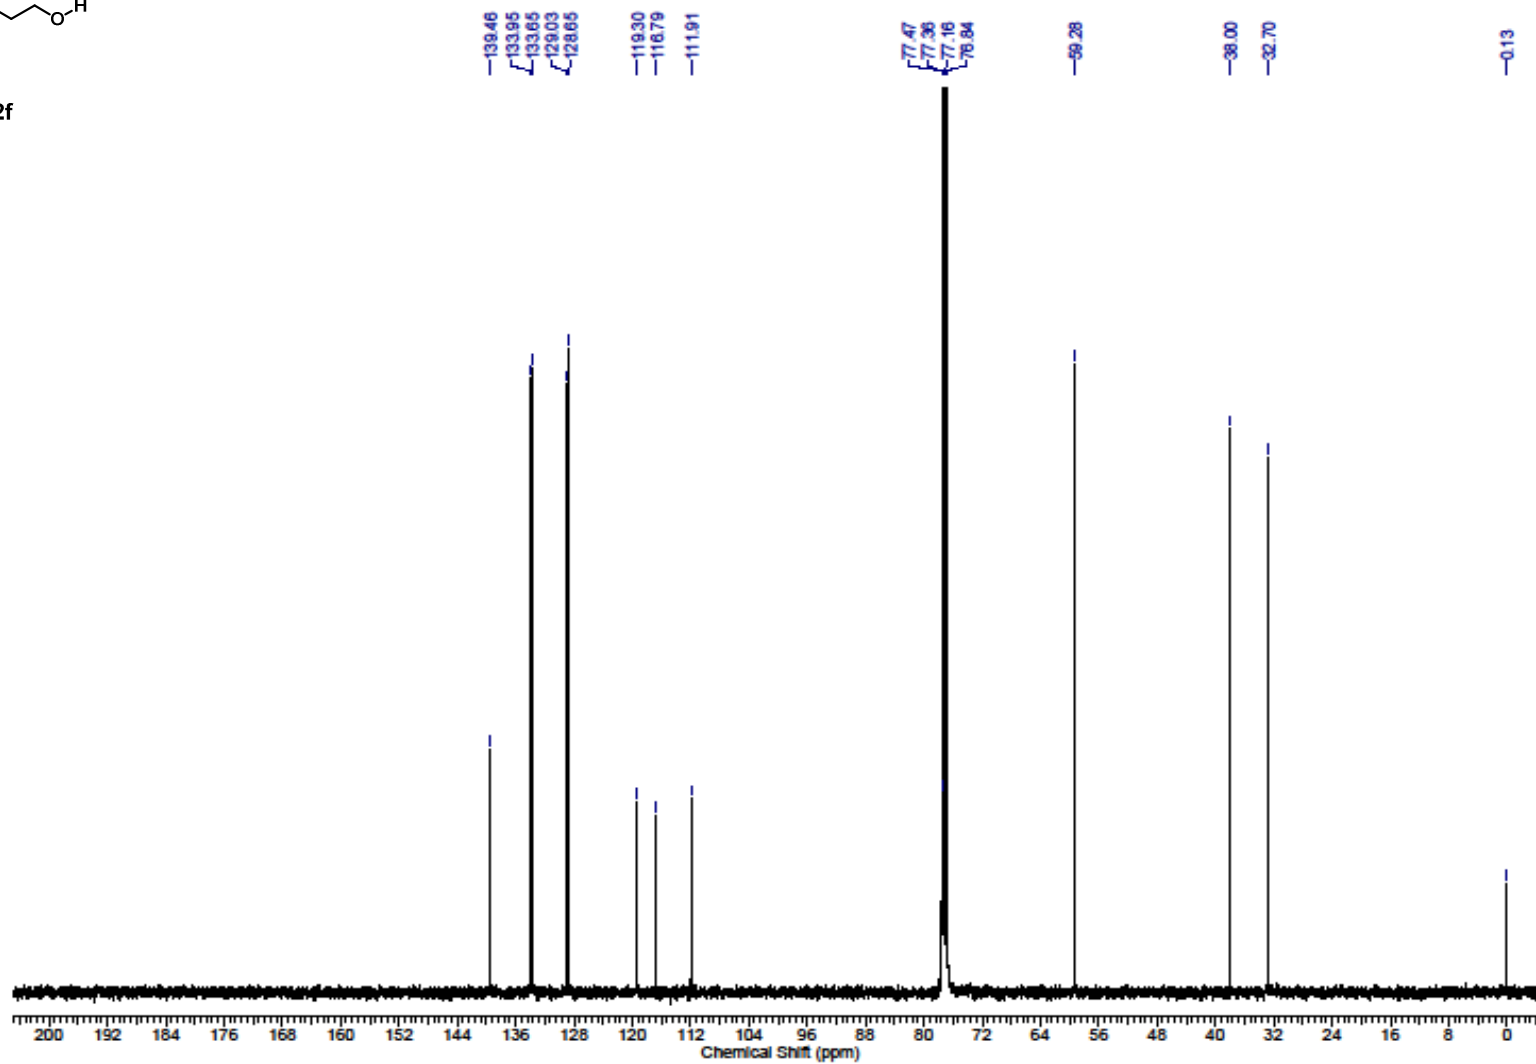

$^1\text{H}$  NMR spectrum of **2g** in  $\text{CDCl}_3$  with 0.05% v/v TMS (400 MHz)

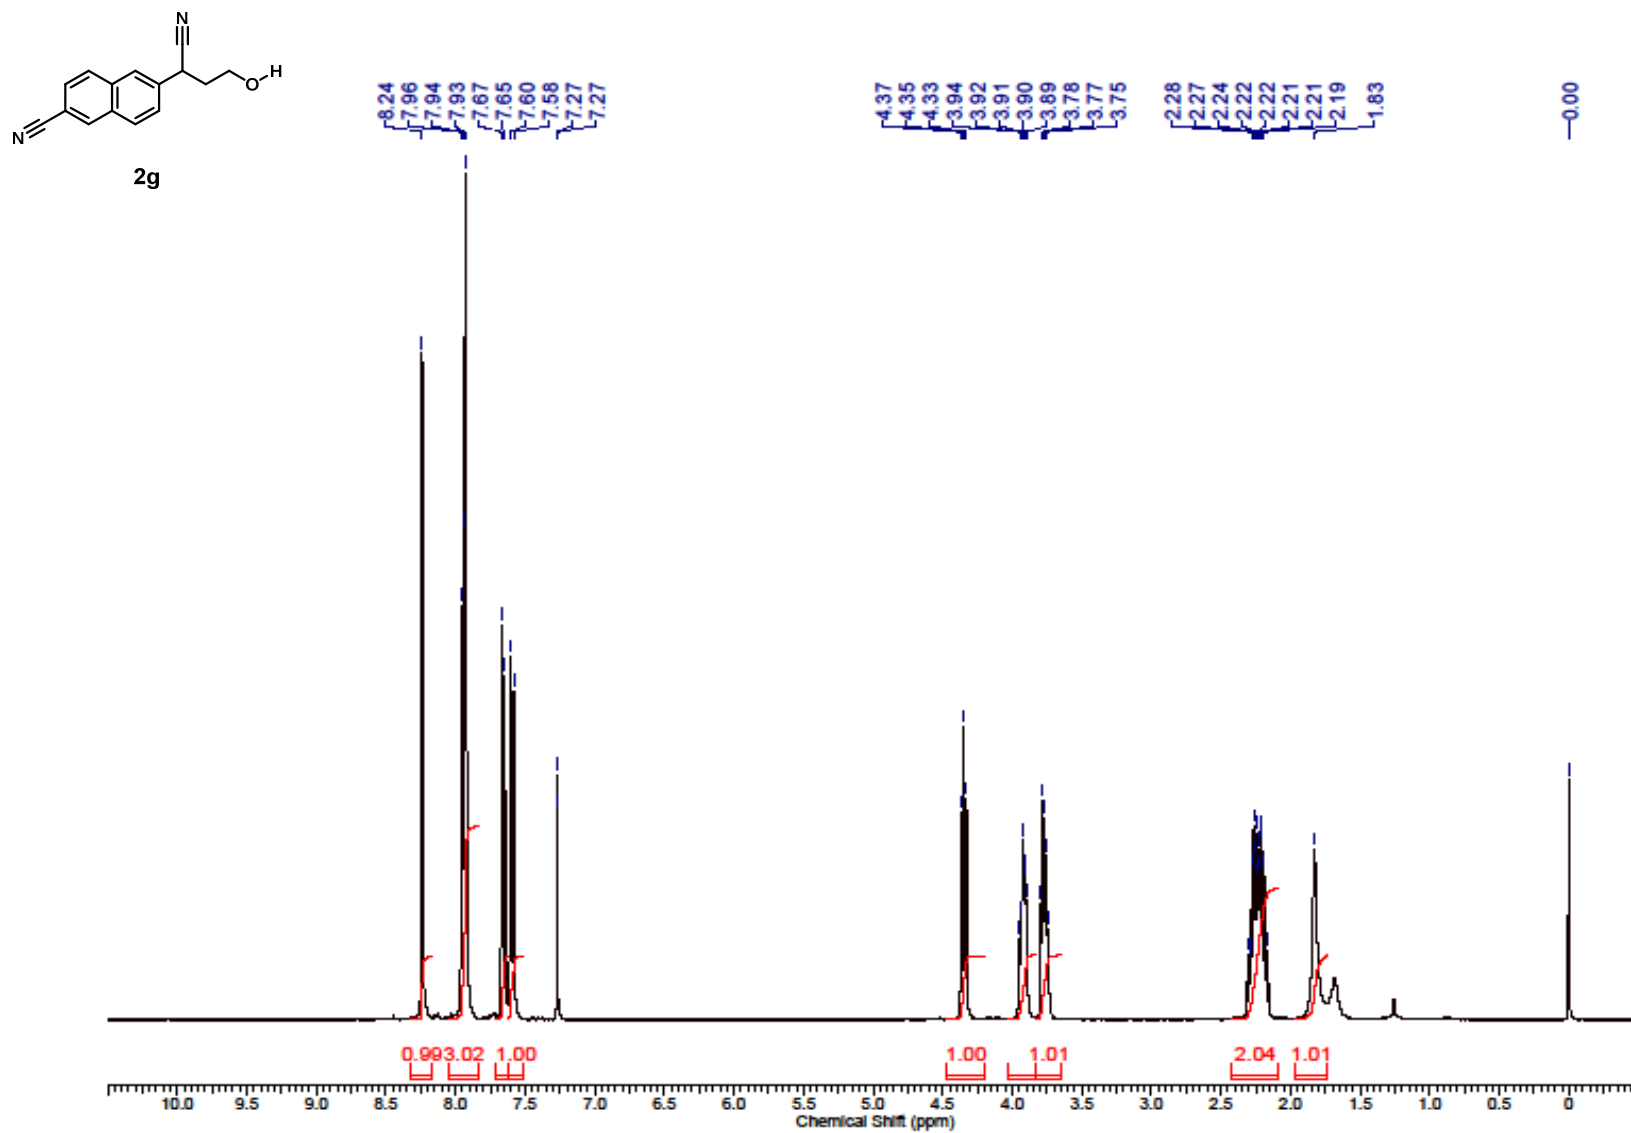

$^{13}\text{C}\{^1\text{H}\}$  NMR spectrum of **2g** in  $\text{CDCl}_3$  with 0.05% v/v TMS (100 MHz)

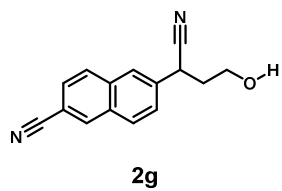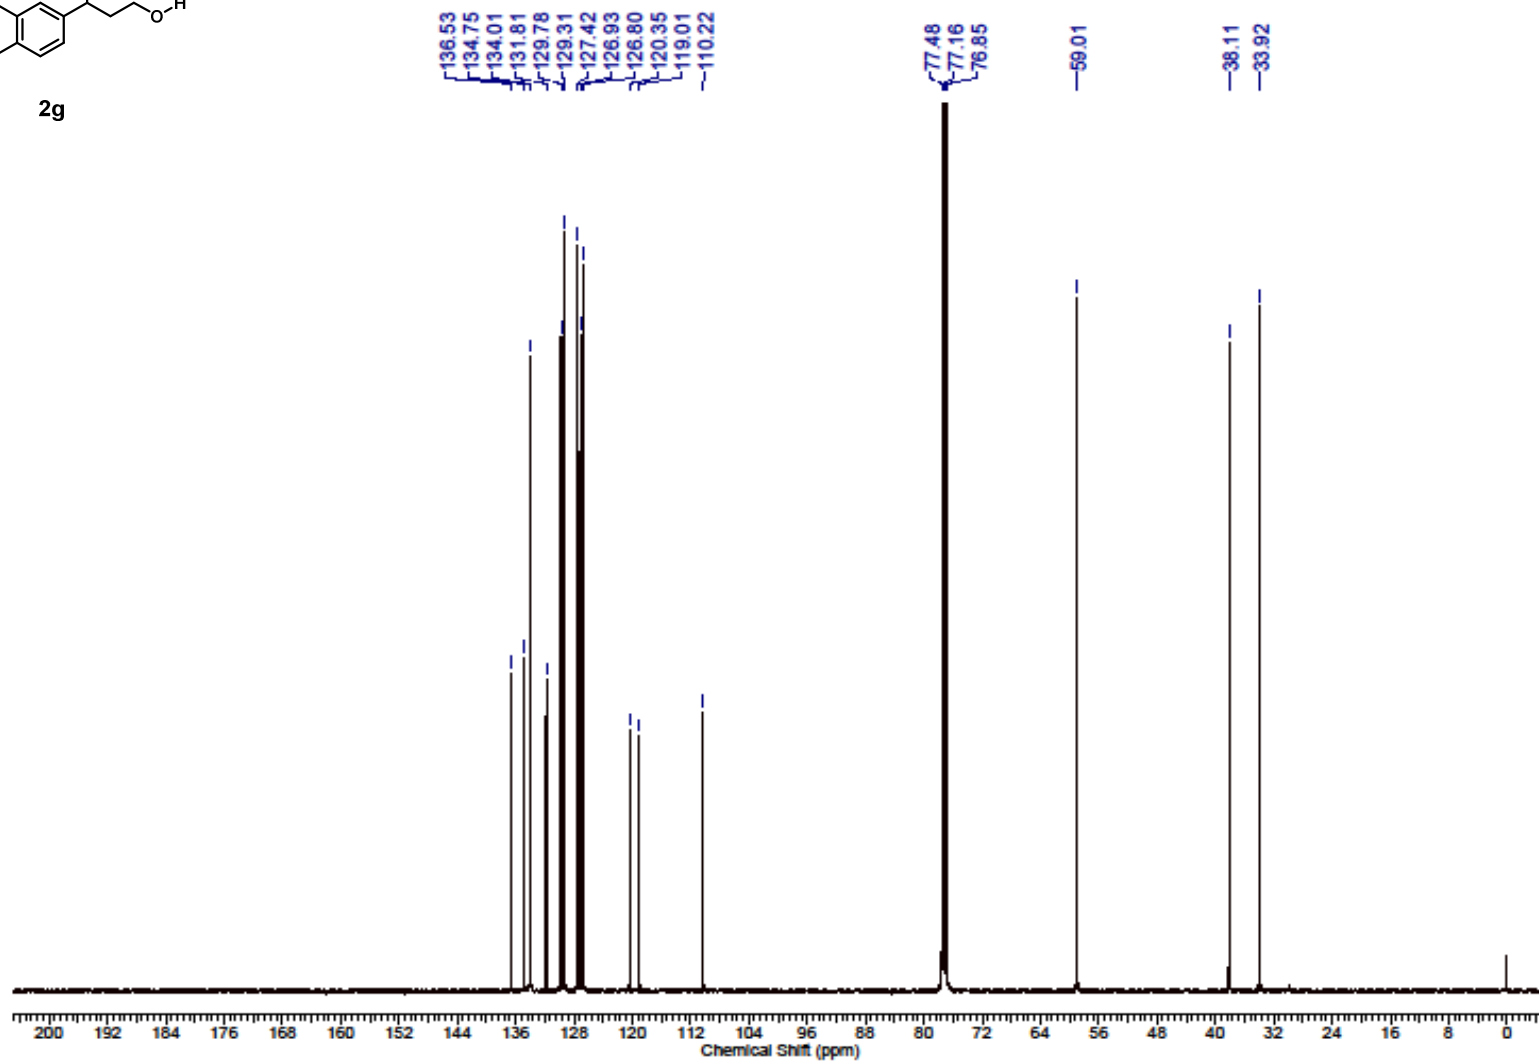



$^1\text{H}$  NMR spectrum of **2j** in  $\text{CDCl}_3$  with 0.05% v/v TMS (400 MHz)

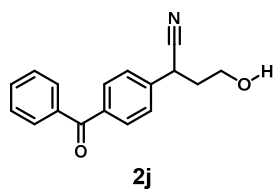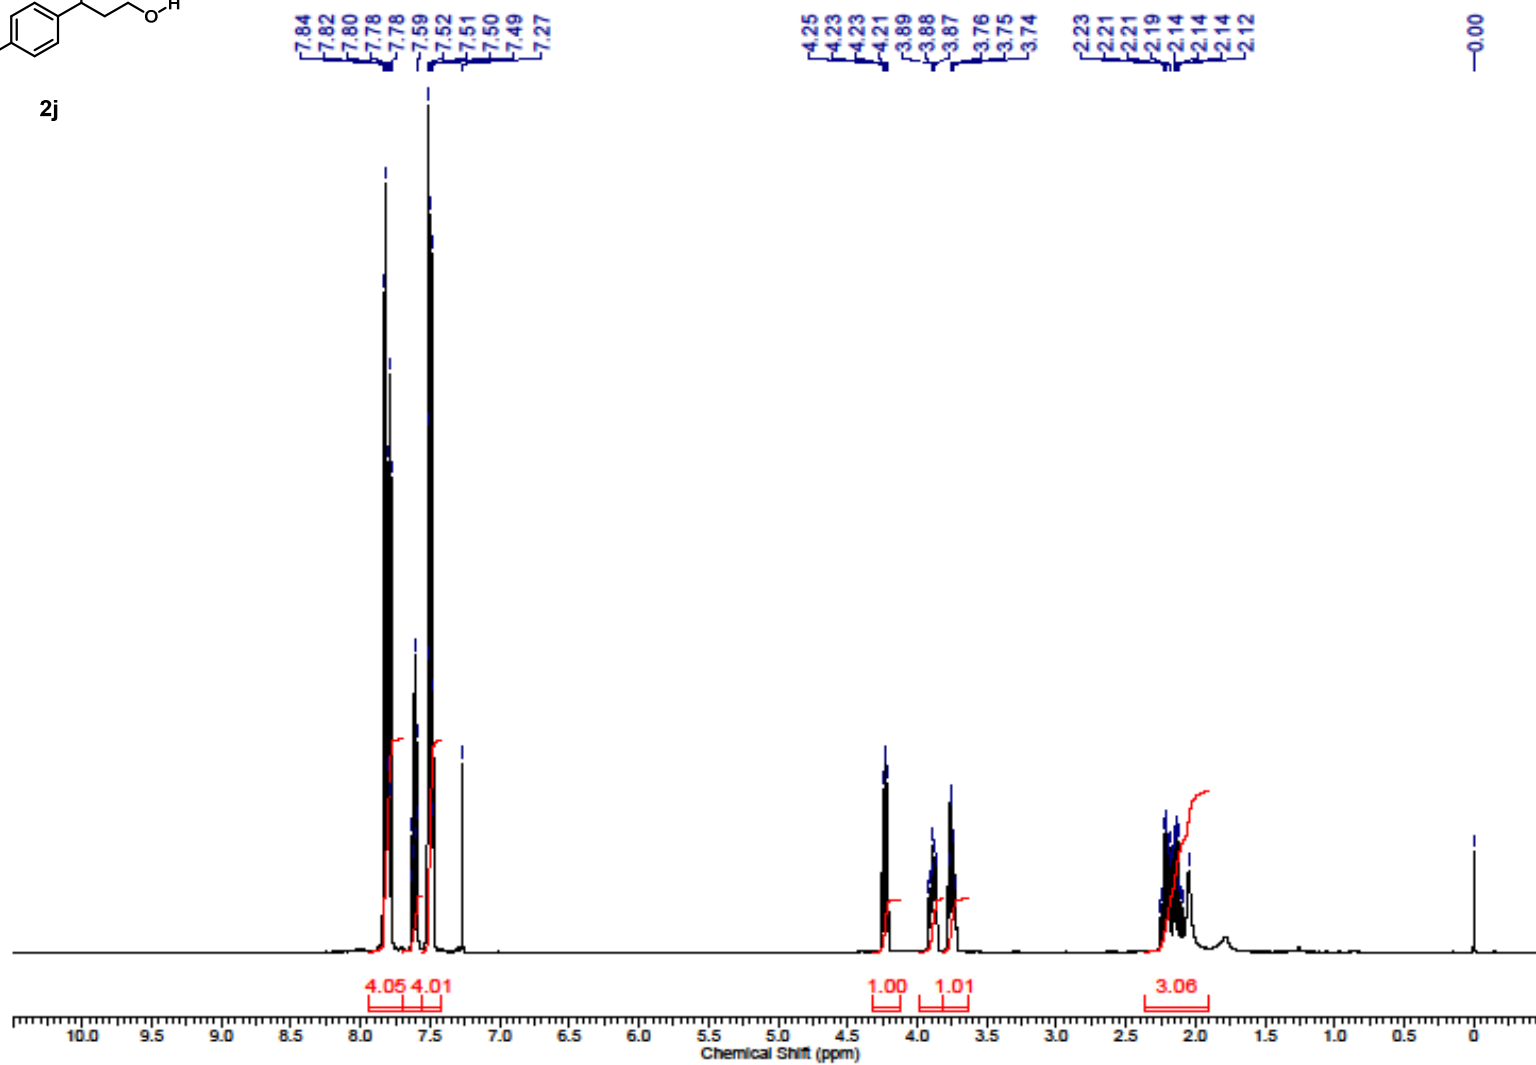

$^{13}\text{C}\{^1\text{H}\}$  NMR spectrum of **2j** in  $\text{CDCl}_3$  with 0.05% v/v TMS (100 MHz)

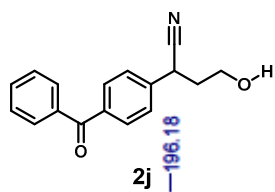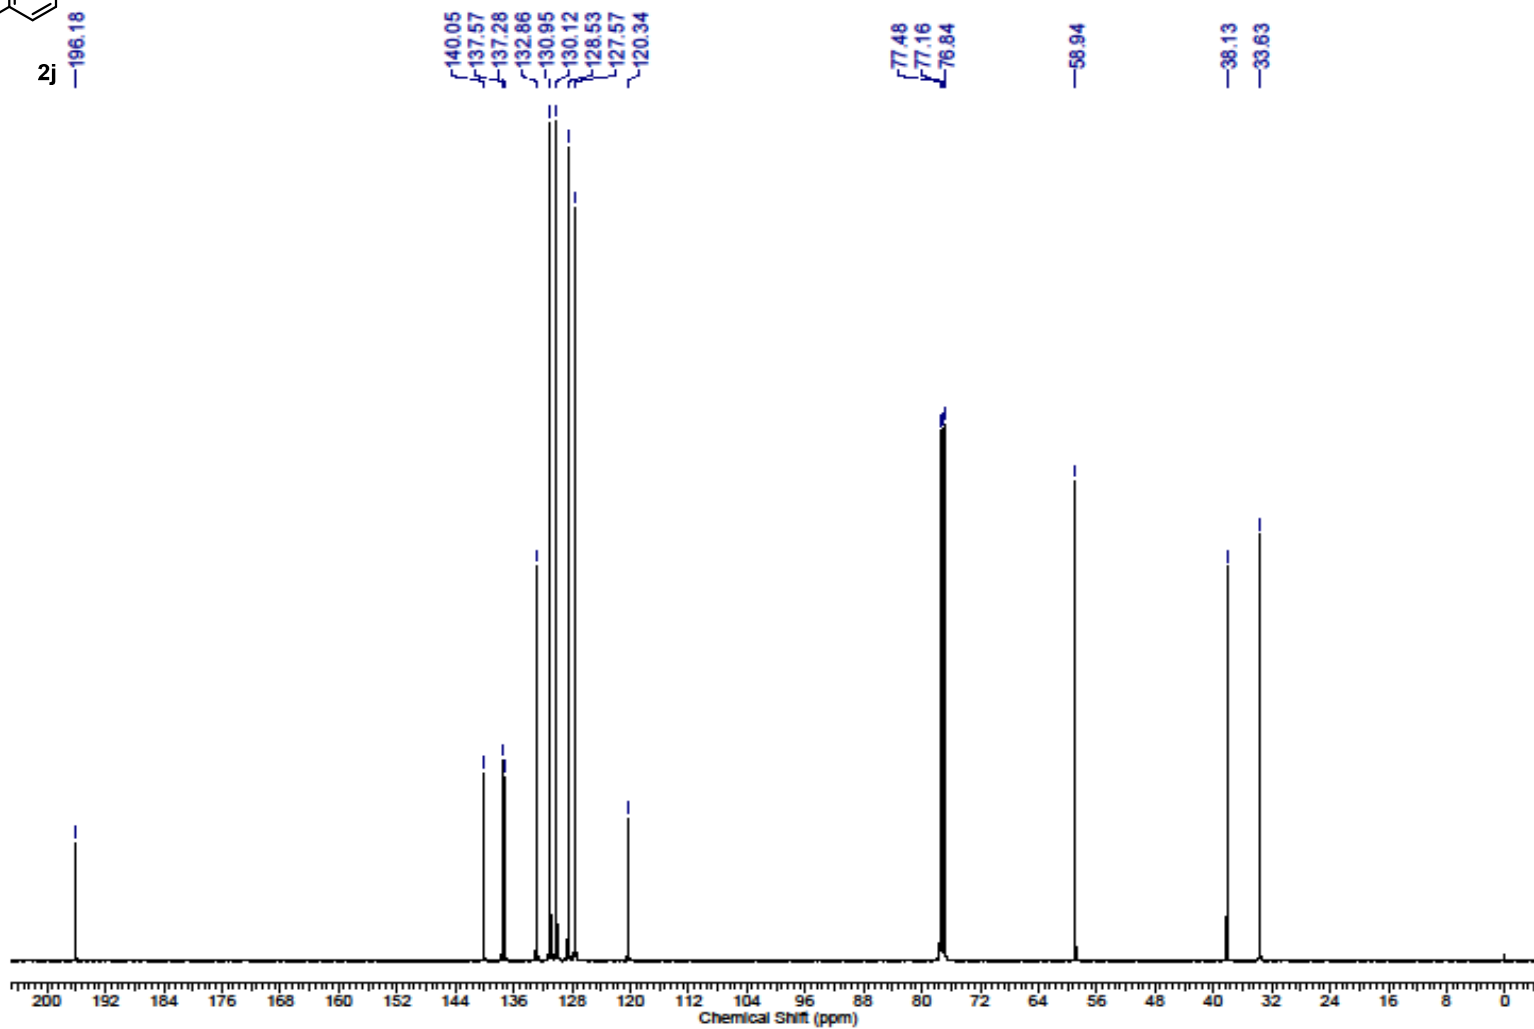

$^1\text{H}$  NMR spectrum of **2r** in  $\text{CDCl}_3$  with 0.05% v/v TMS (400 MHz)

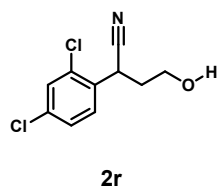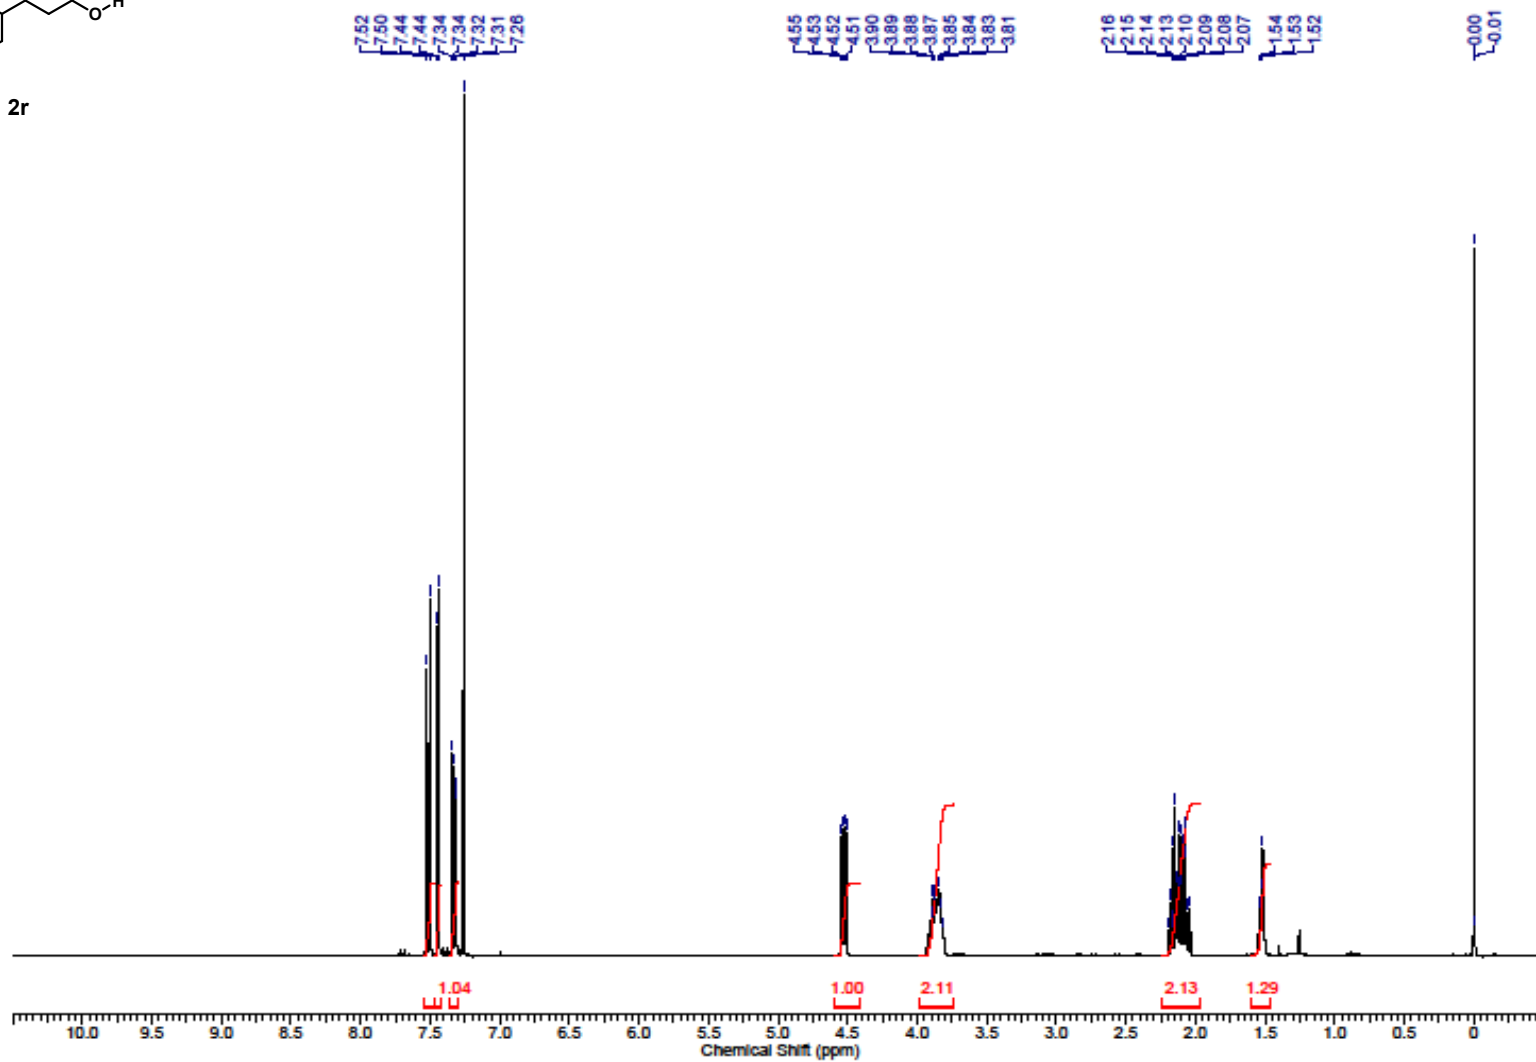

$^{13}\text{C}\{^1\text{H}\}$  NMR spectrum of **2r** in  $\text{CDCl}_3$  with 0.05% v/v TMS (100 MHz)

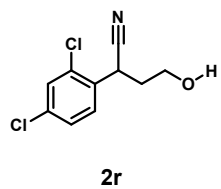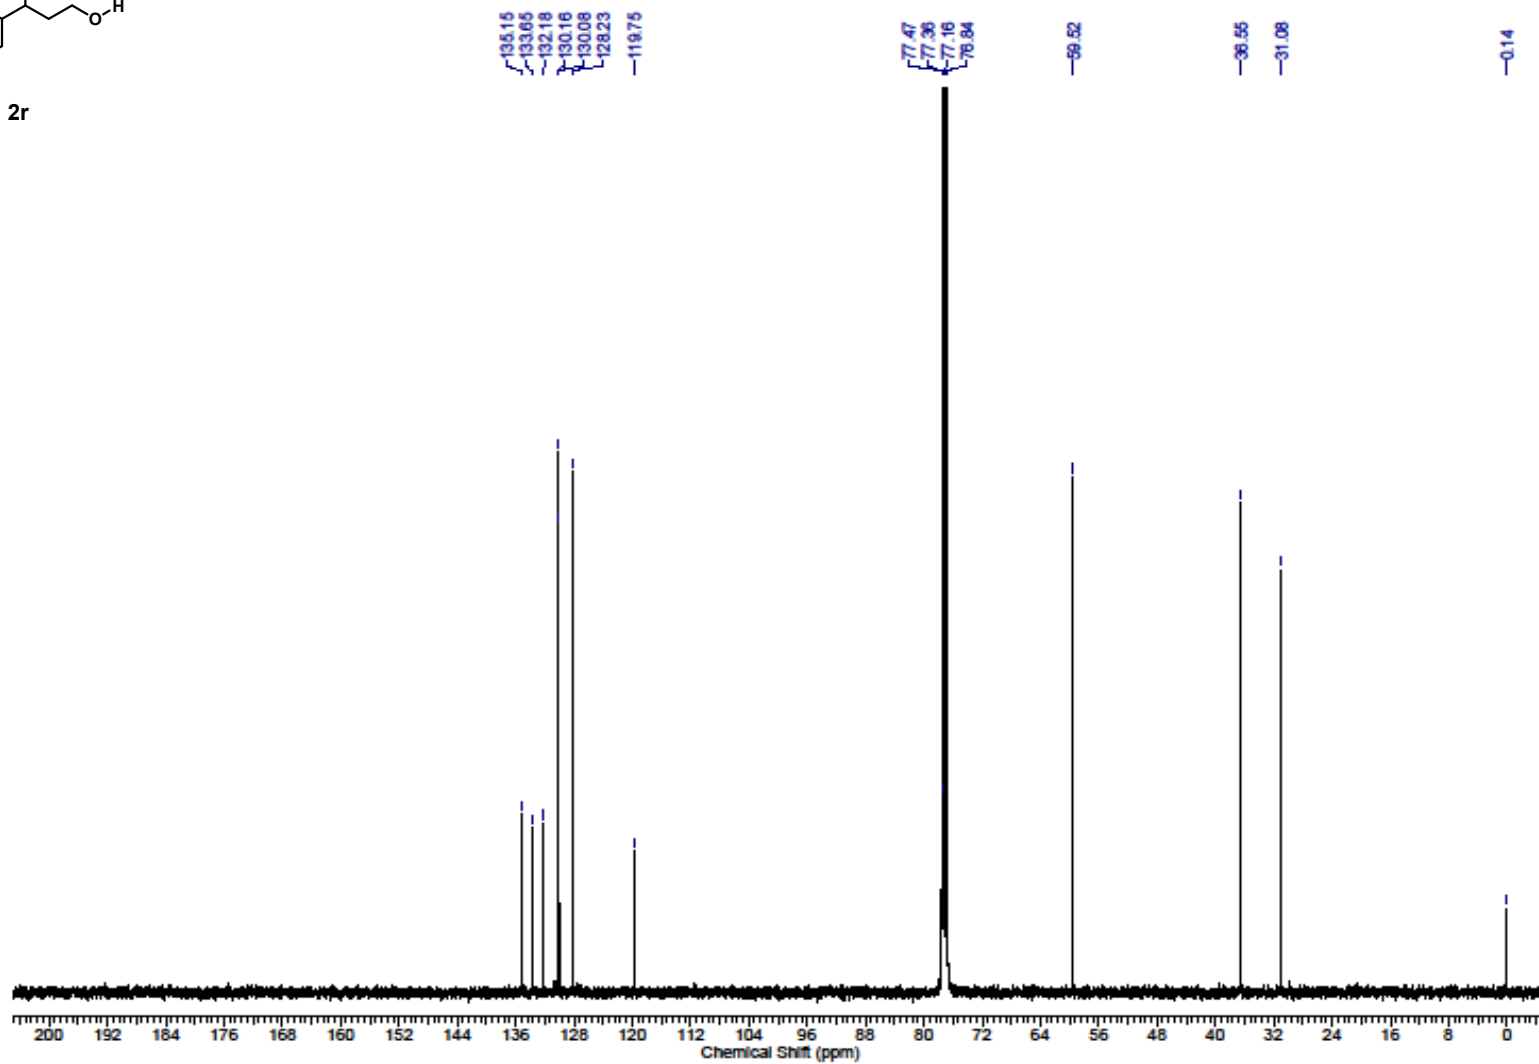

$^1\text{H}$  NMR spectrum of **2s** in  $\text{CDCl}_3$  with 0.05% v/v TMS (400 MHz)

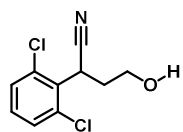

**2s**

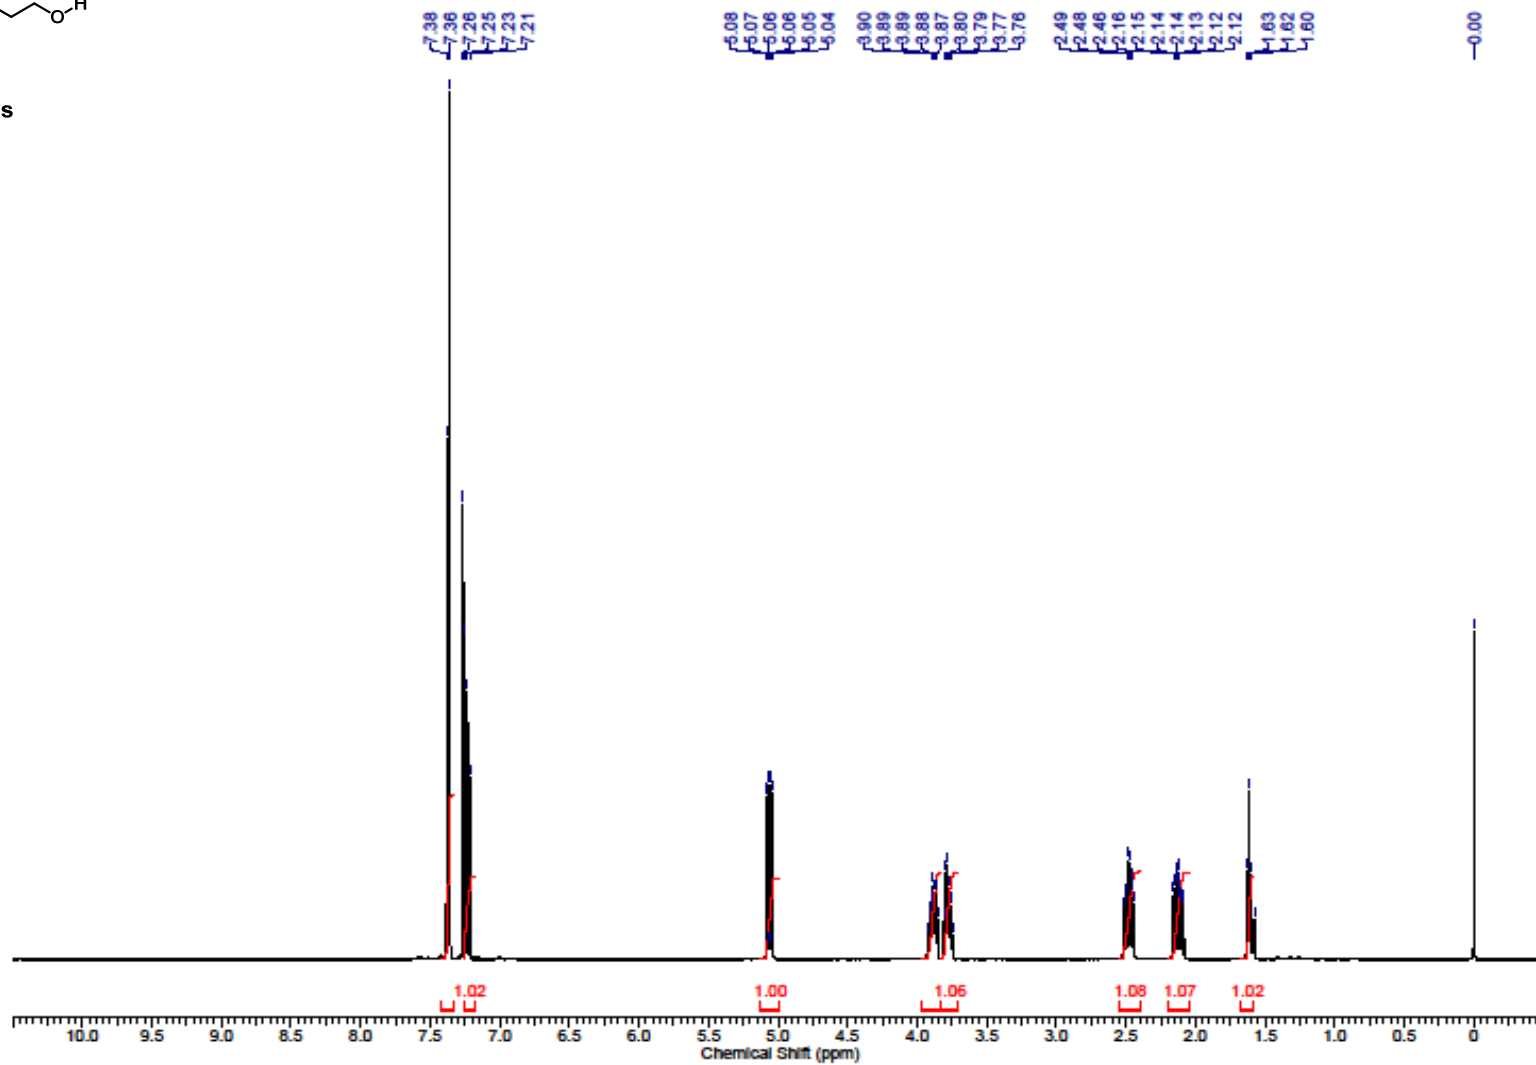

$^{13}\text{C}\{^1\text{H}\}$  NMR spectrum of **2s** in  $\text{CDCl}_3$  with 0.05% v/v TMS (100 MHz)



**2s**

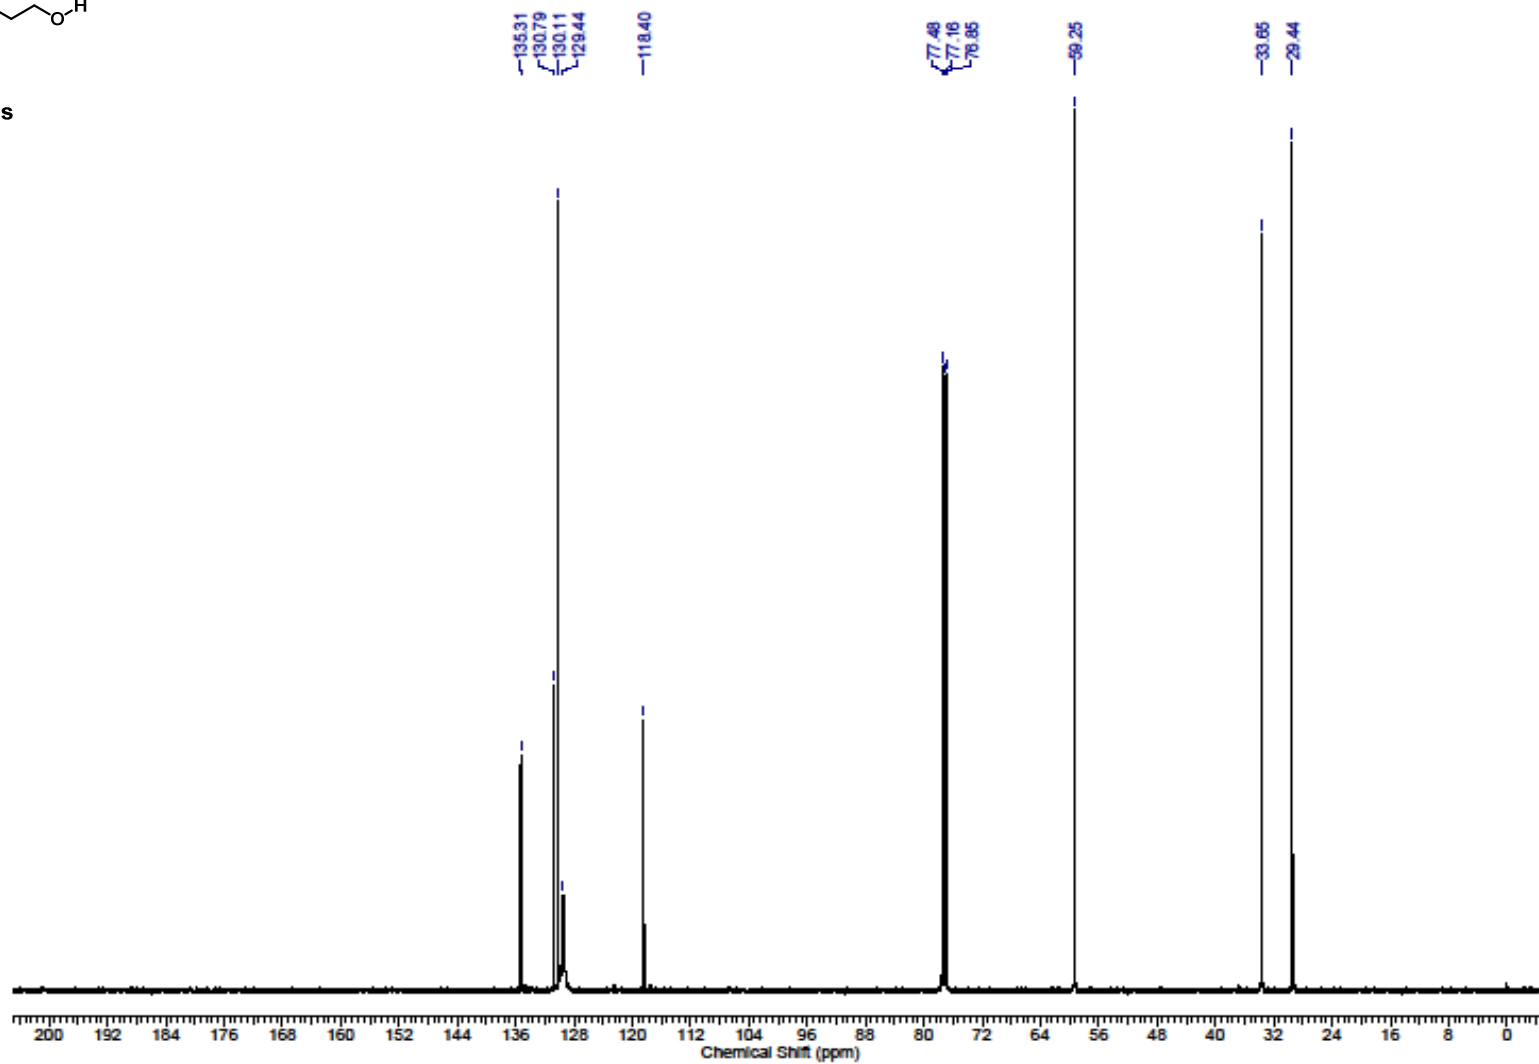

$^1\text{H}$  NMR spectrum of **2t** in  $\text{CDCl}_3$  with 0.05% v/v TMS (400 MHz)

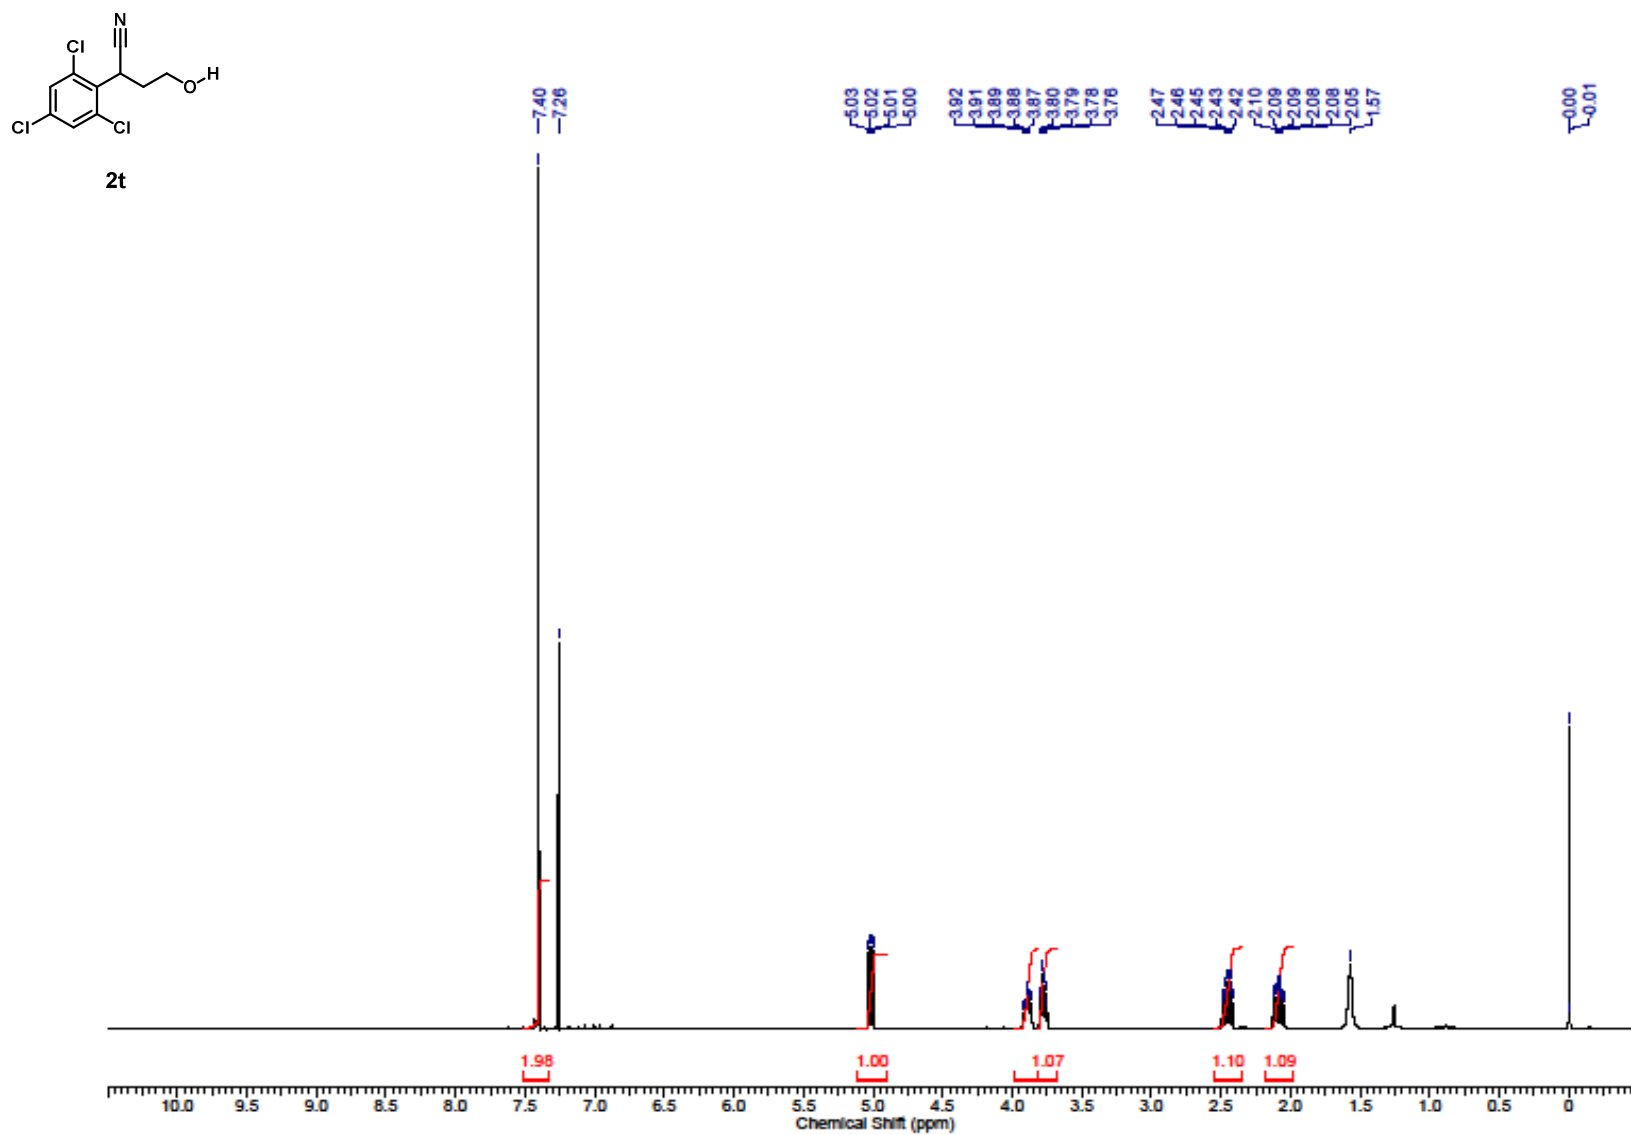

$^{13}\text{C}\{^1\text{H}\}$  NMR spectrum of **2t** in  $\text{CDCl}_3$  with 0.05% v/v TMS (100 MHz)

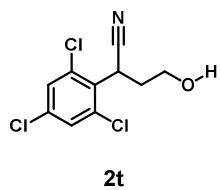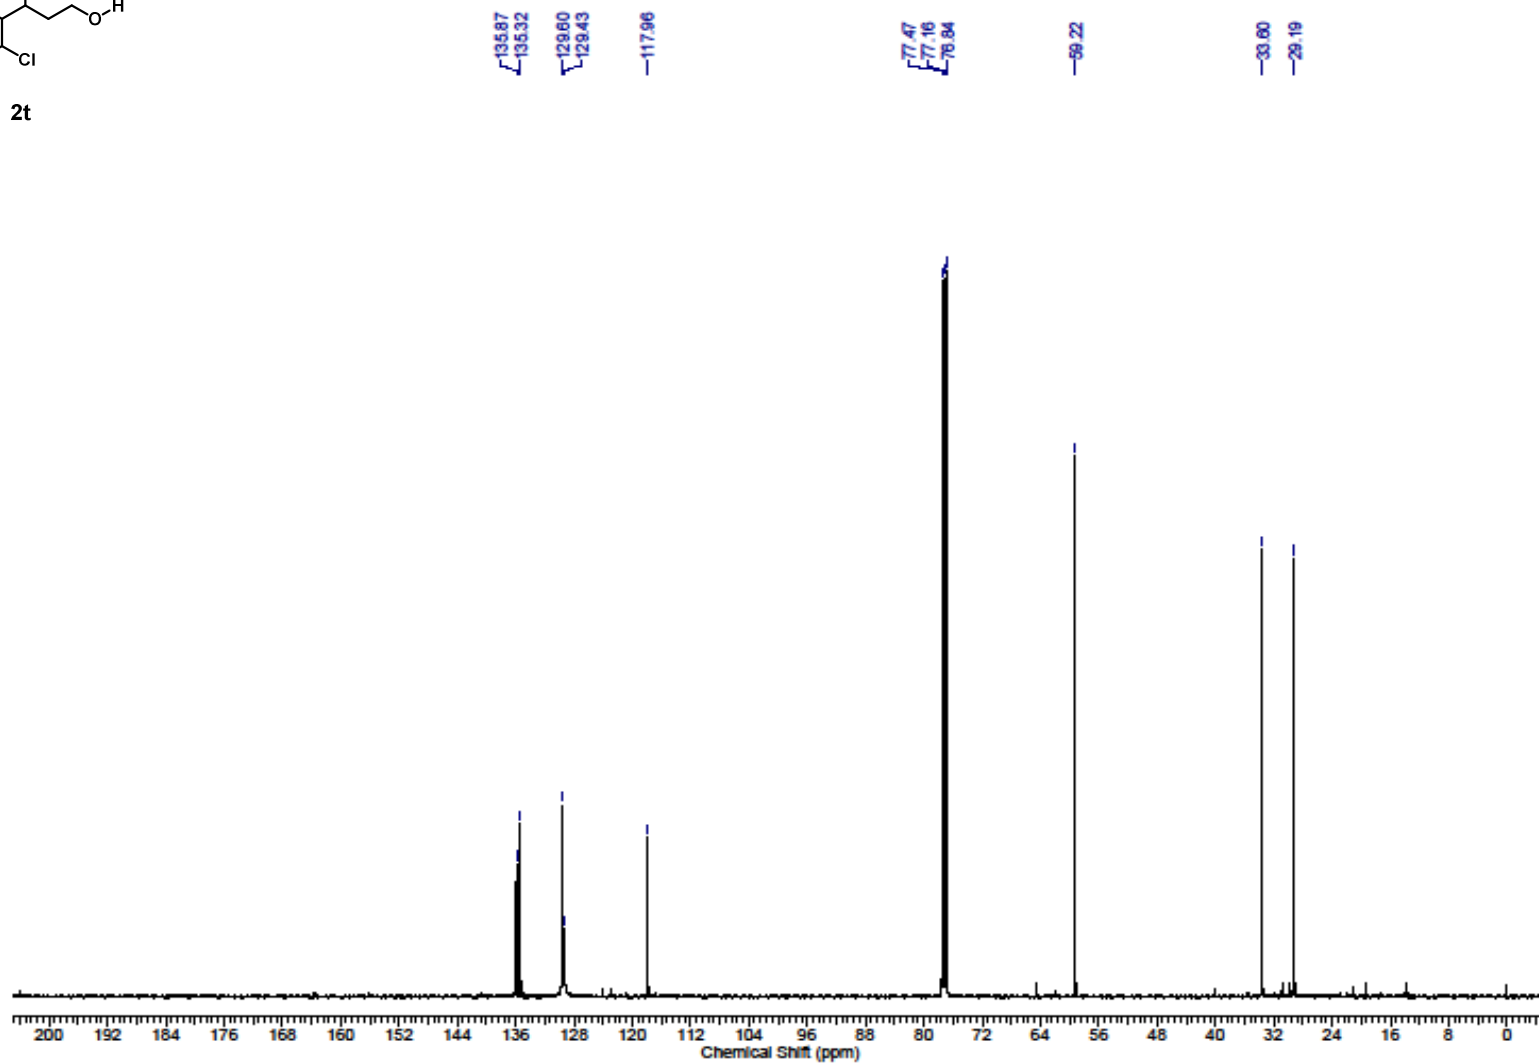



$^1\text{H}$  NMR spectrum of **2w** in  $\text{CDCl}_3$  with 0.05% v/v TMS (400 MHz)

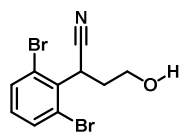

**2w**

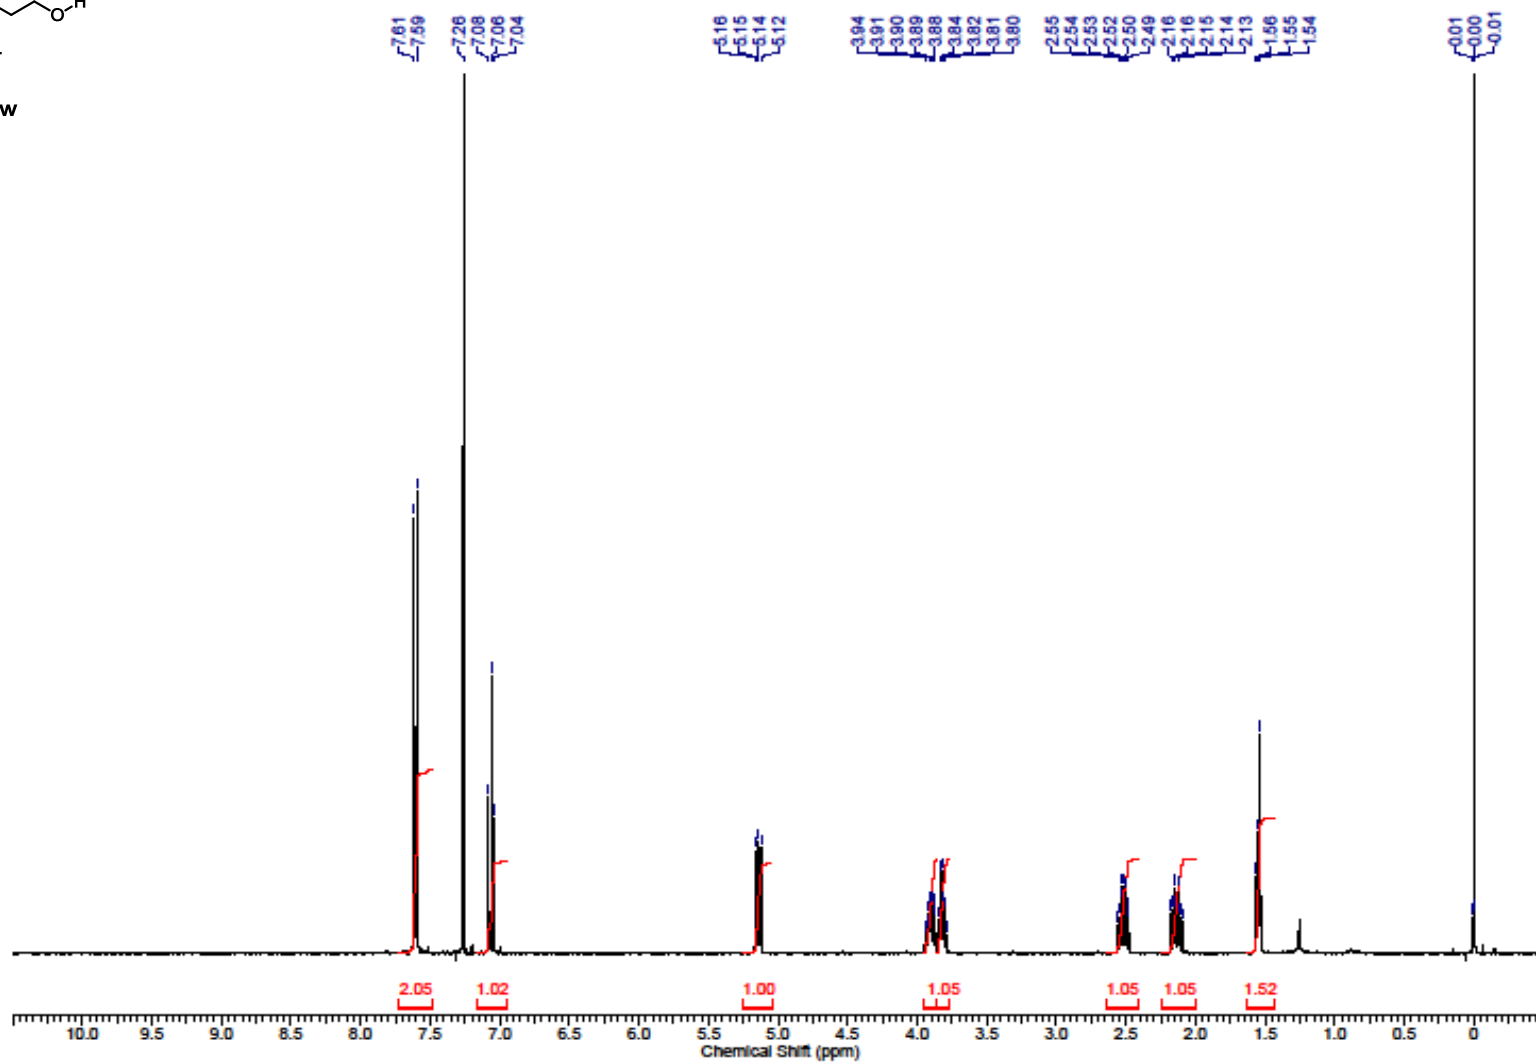

$^{13}\text{C}\{^1\text{H}\}$  NMR spectrum of **2w** in  $\text{CDCl}_3$  with 0.05% v/v TMS (100 MHz)



**2w**

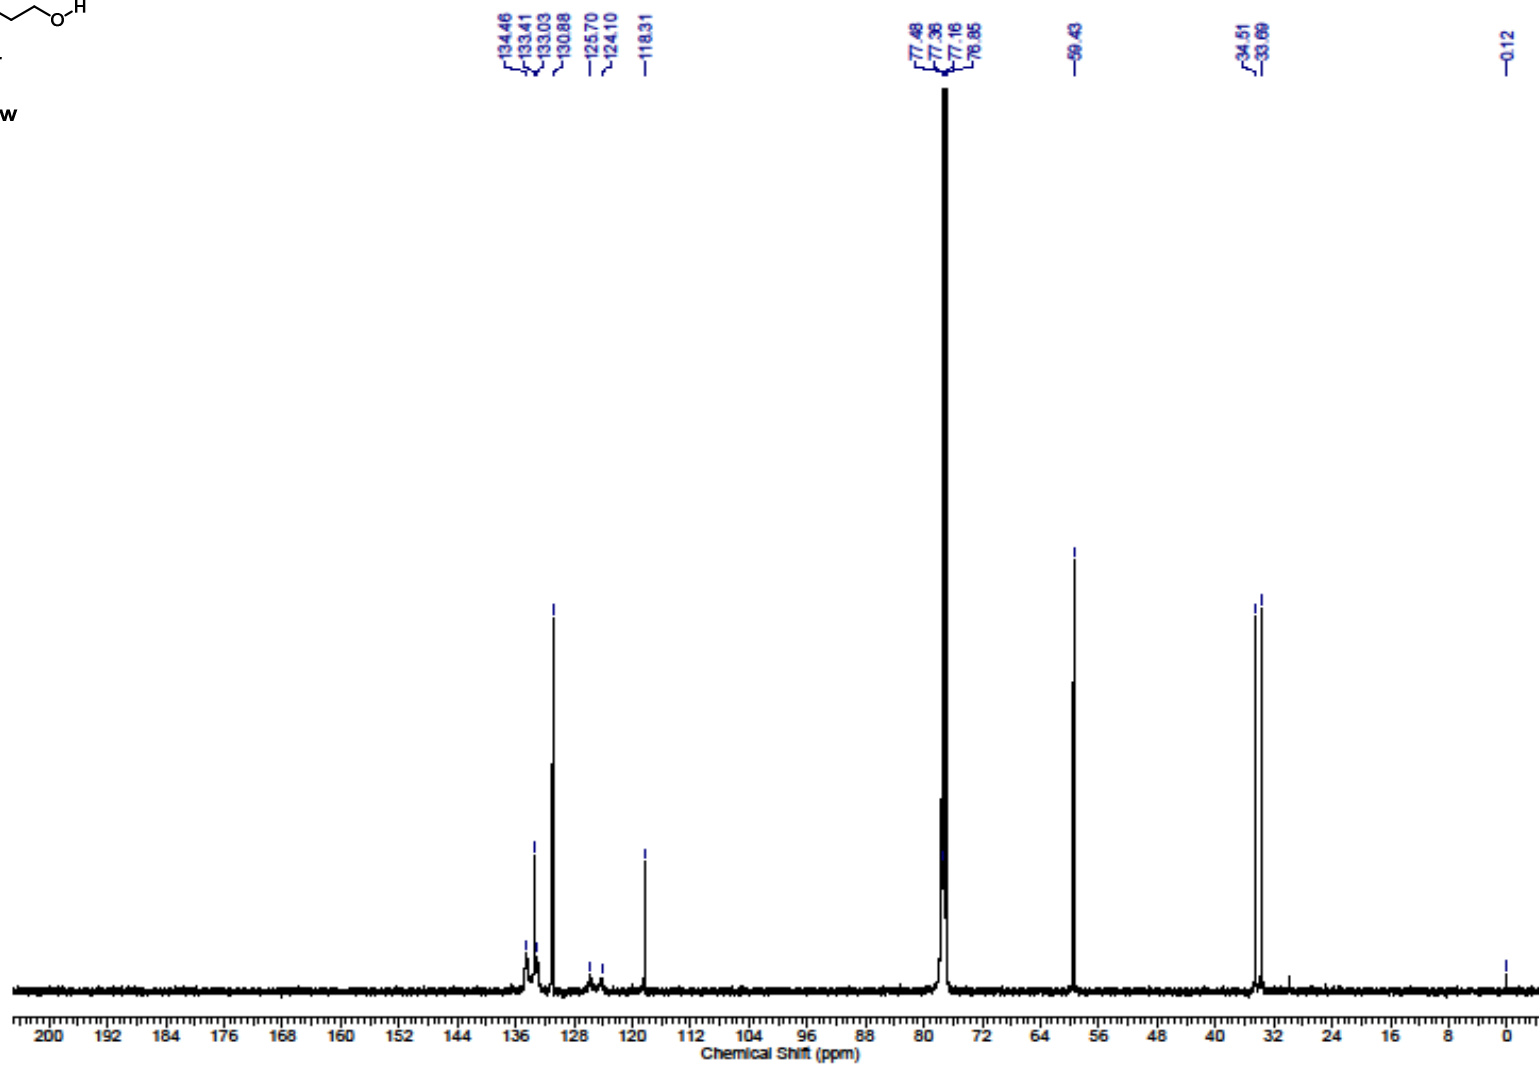

<sup>1</sup>H NMR spectrum of **3** in CDCl<sub>3</sub> with 0.05% v/v TMS (400 MHz)

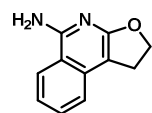

**3**

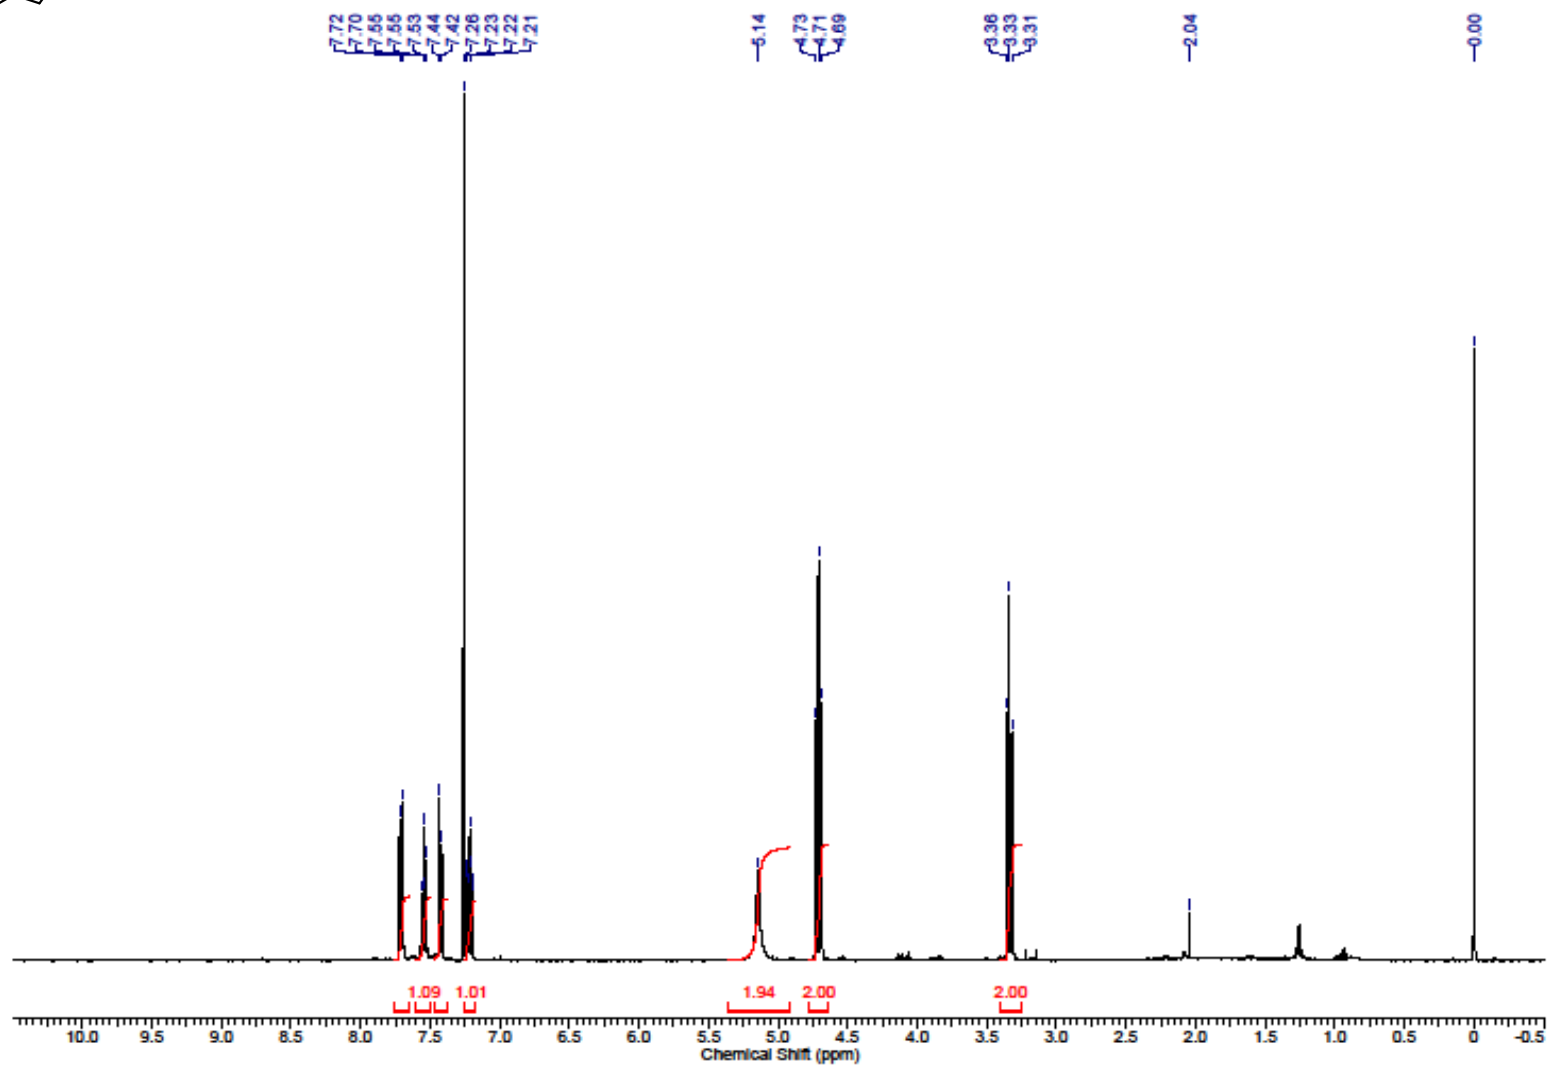

$^1\text{H}$  NMR spectrum of **4** in  $\text{CDCl}_3$  with 0.05% v/v TMS (400 MHz)

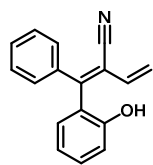

**4**

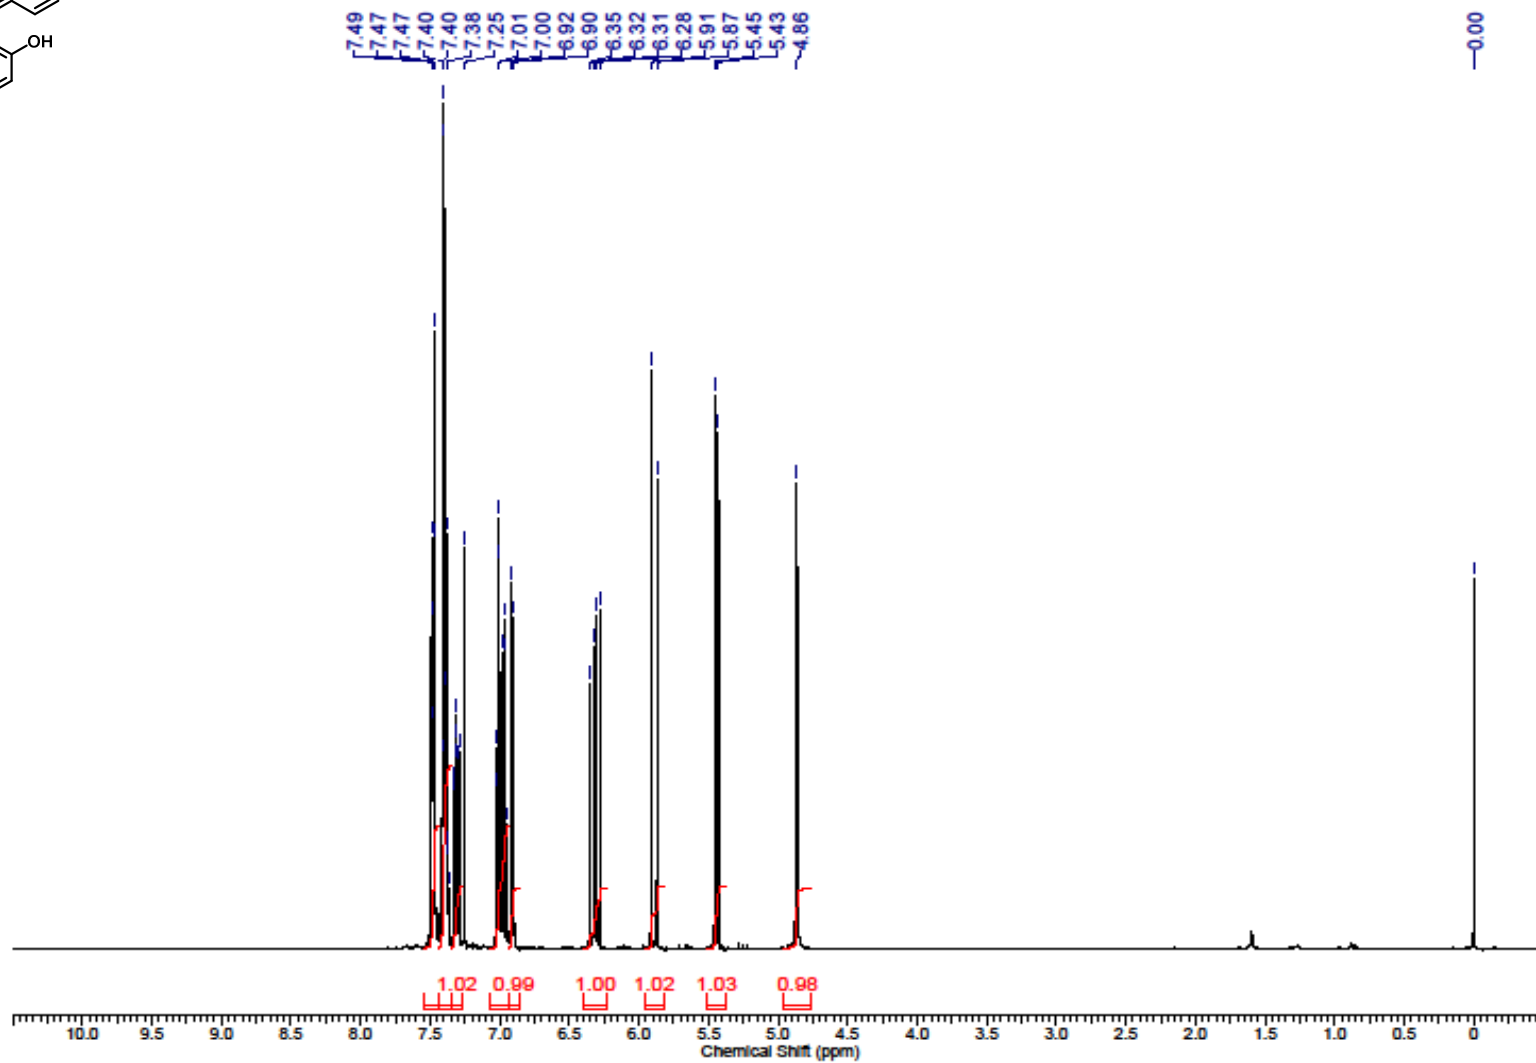

$^{13}\text{C}\{^1\text{H}\}$  NMR spectrum of **4** in  $\text{CDCl}_3$  with 0.05% v/v TMS (100 MHz)



**4**

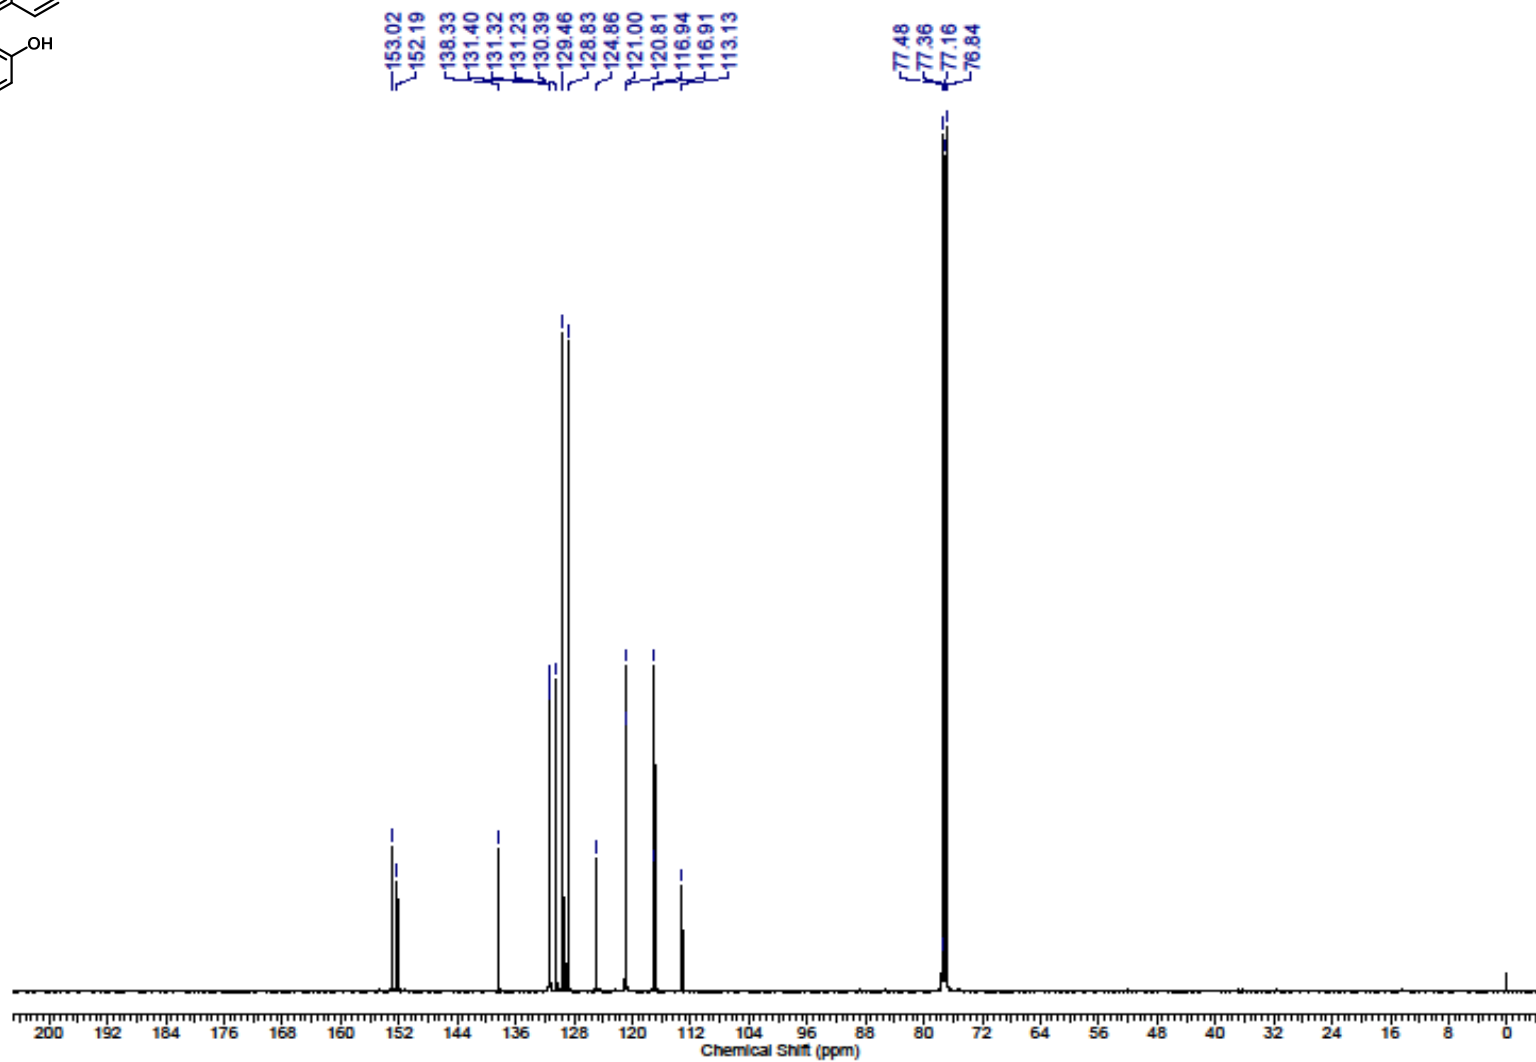

$^1\text{H}$  NMR spectrum of **5** in  $\text{CDCl}_3$  with 0.05% v/v TMS (400 MHz)

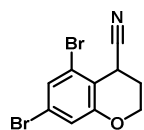

**5**

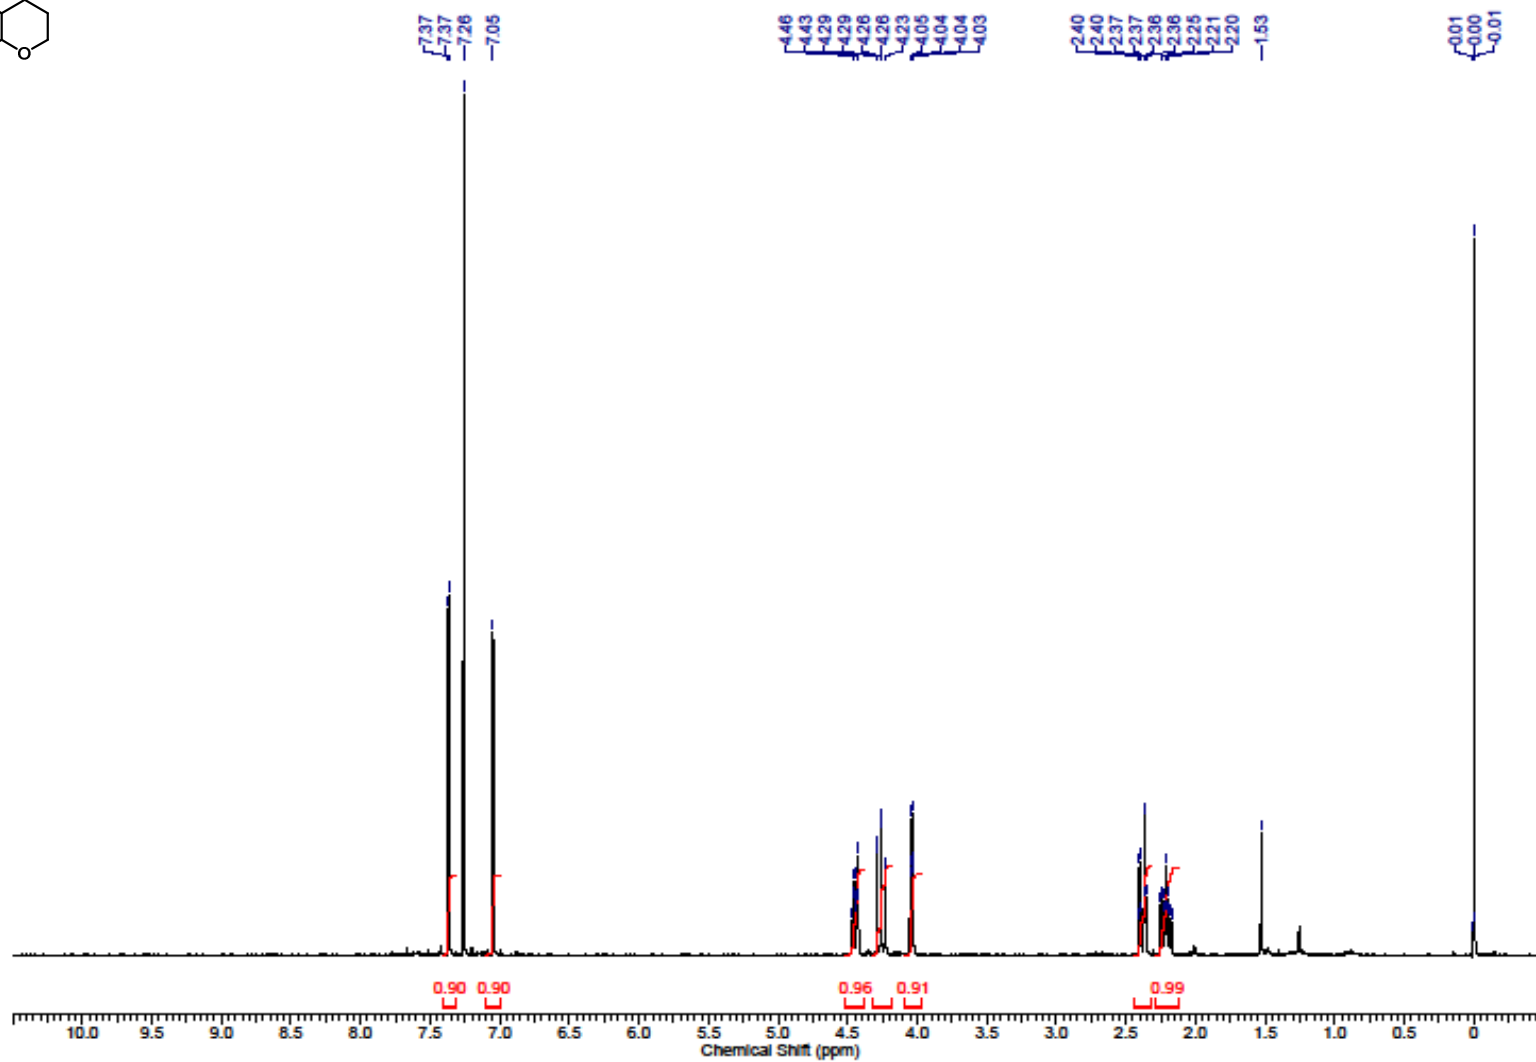

$^{13}\text{C}\{^1\text{H}\}$  NMR spectrum of **5** in  $\text{CDCl}_3$  with 0.05% v/v TMS (100 MHz)



**5**

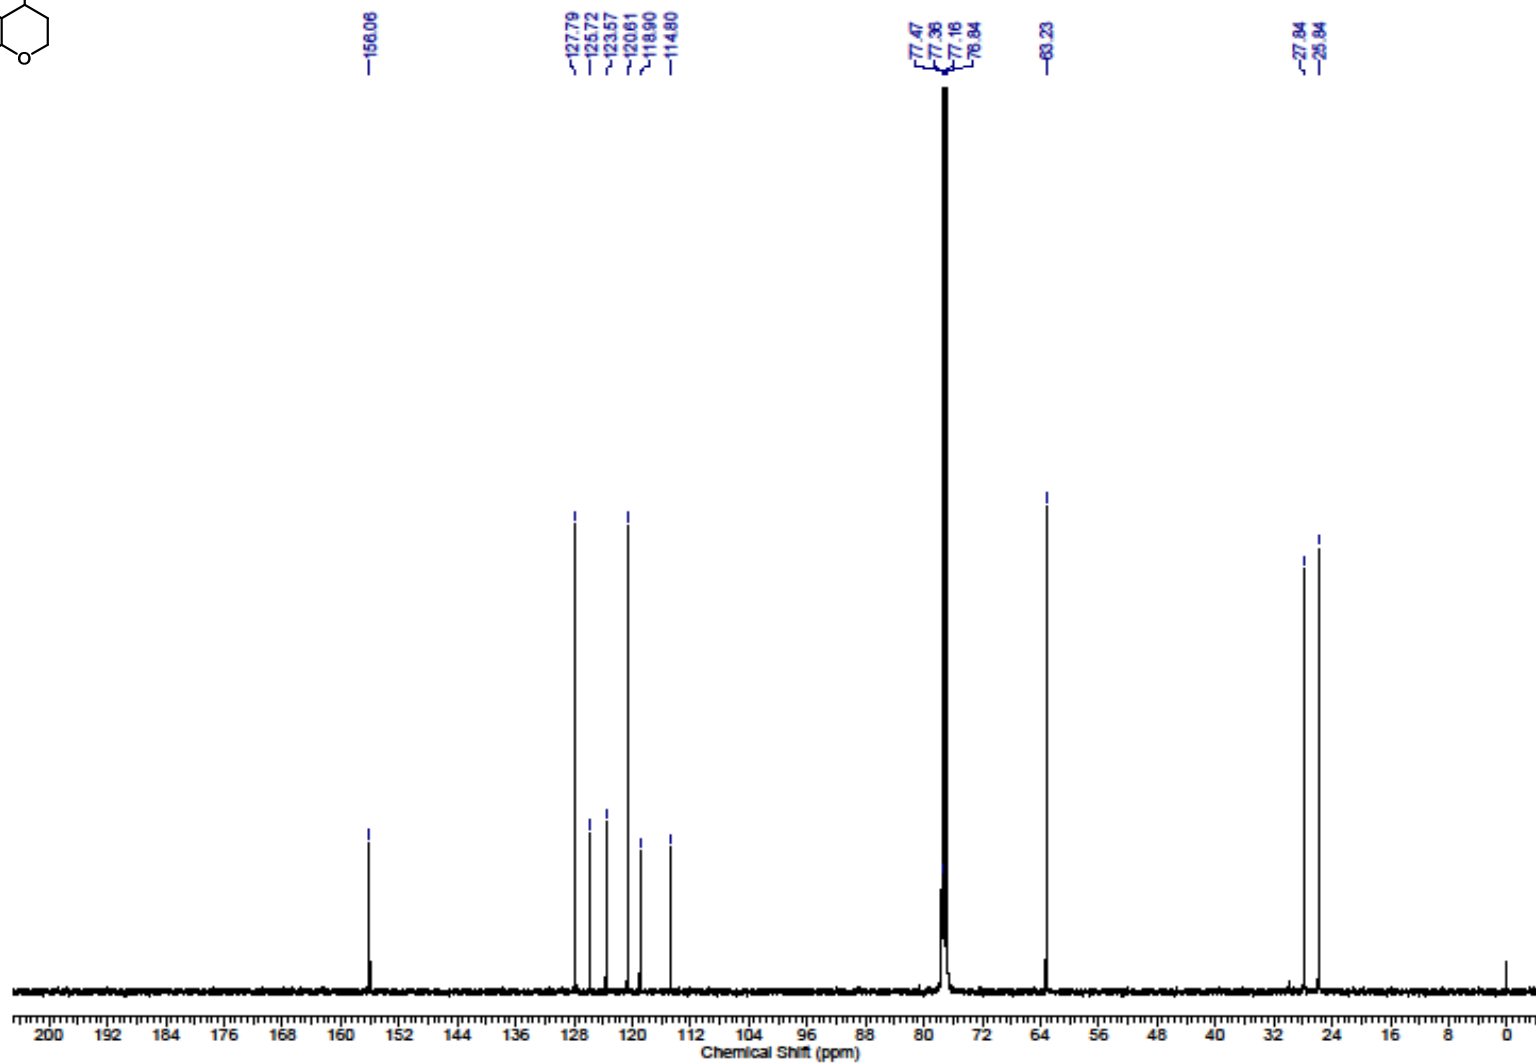

$^1\text{H}$  NMR spectrum in  $(\text{CD}_3)_2\text{SO}$  with 0.05% v/v TMS (400 MHz)

In situ observation of Meisenheimer intermediate (NOTE: **1a** annotated with \*)

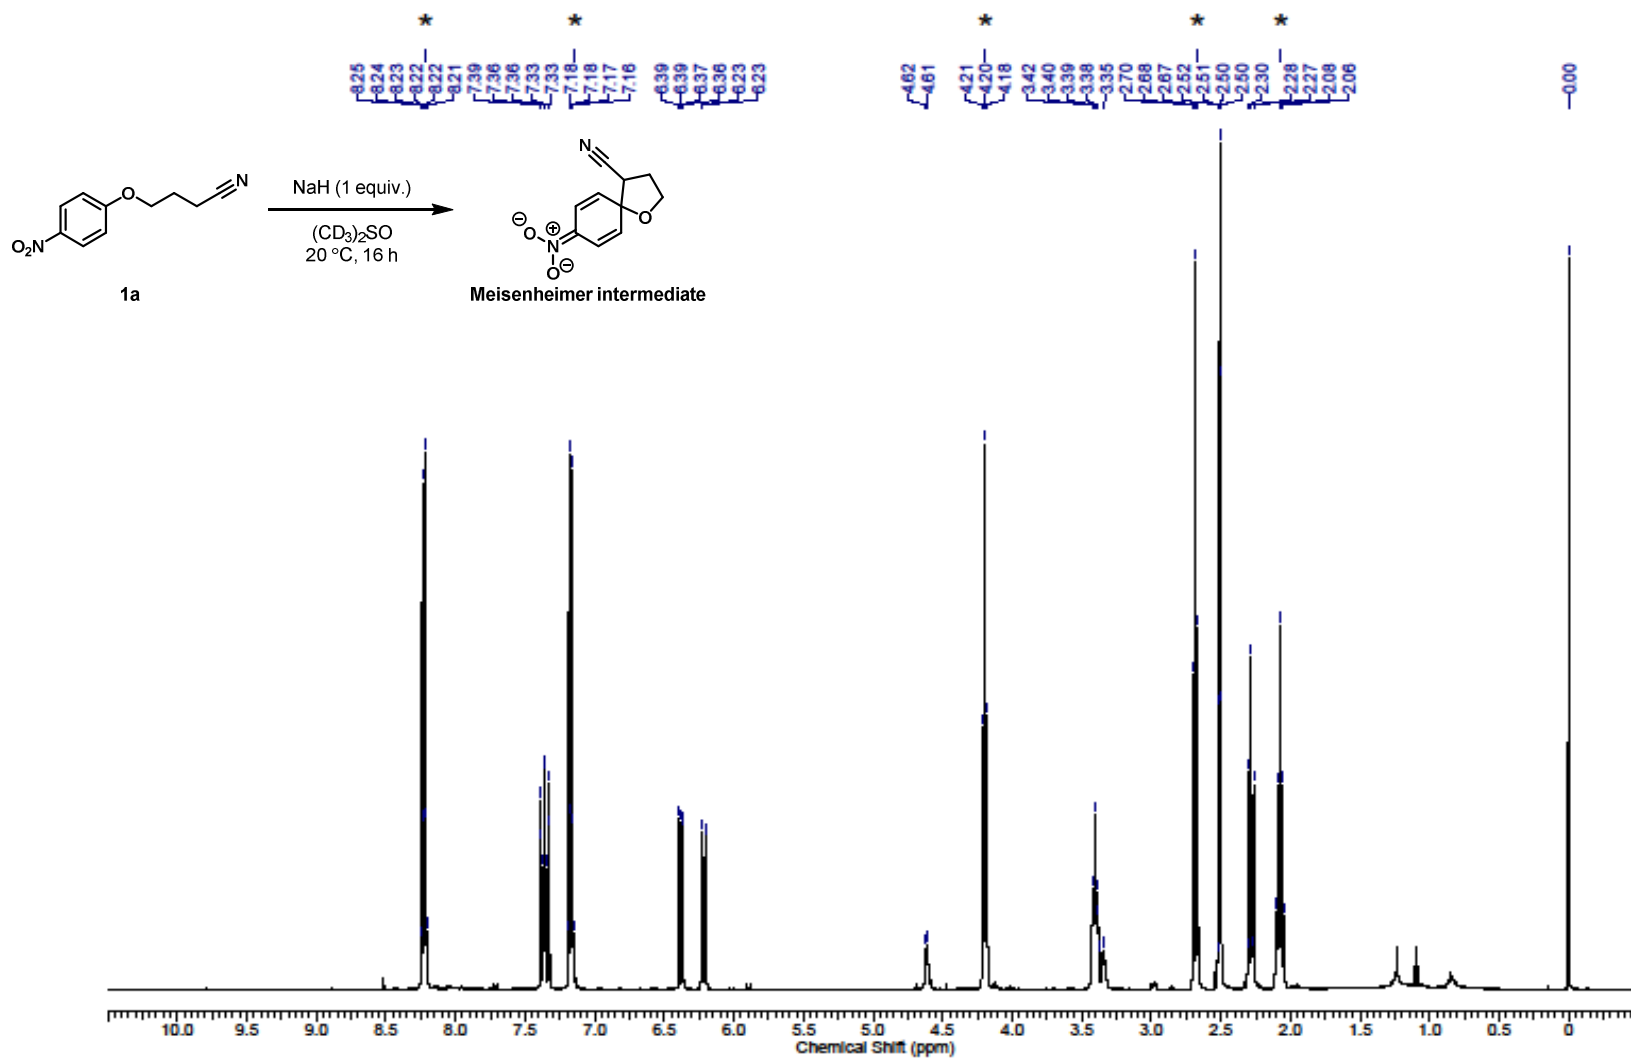



$^{13}\text{C}\{^1\text{H}\}$  NMR spectrum in  $(\text{CD}_3)_2\text{SO}$  with 0.05% v/v TMS (100 MHz)

In situ observation of Meisenheimer intermediate (NOTE: **1a** annotated with \*)

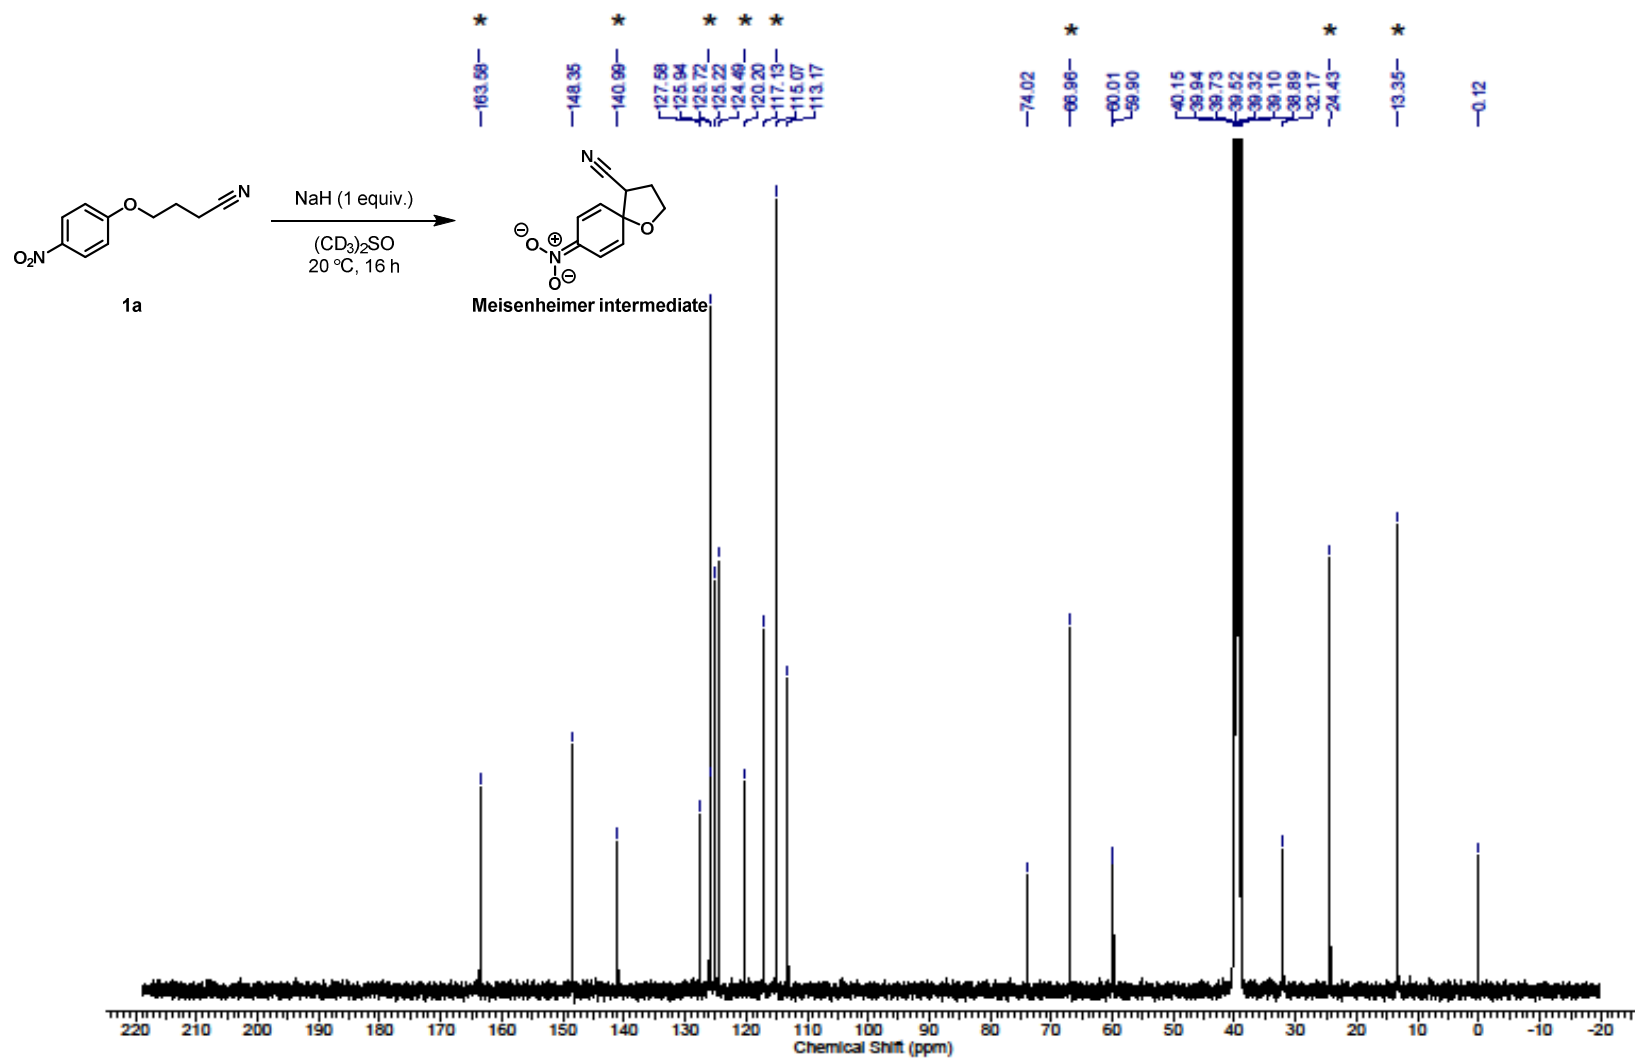

Supplement: c5ob00812c1.pdf [file c5ob00812c1.pdf]
